# Supplementary material for: Global transcription factors analyses reveal hierarchy and synergism of regulatory networks and master virulence regulators in Pseudomonas aeruginosa
Source: eLife. 2026 Apr 16;14:RP103346. doi: 10.7554/eLife.103346 (PMC13086498; doi:10.7554/eLife.103346)
Supplement: Supplementary file 2. [file elife-103346-supp2.xlsx]

## Sheet: Sheet1
Supplementary File2. Enriched GO terms of 172 ChIPed TFs.
ID	Description	pvalue	p.adjust	qvalue	geneID	Count	TF
GO:0044267	cellular protein metabolic process	3.24e-06	0.000253	0.000228	PA0008/PA2620/PA2740/PA2970/PA3162/PA4242/PA4248/PA4265/PA4266/PA4274/PA4744/PA5489	12	PA0034
GO:0006412	translation	5.22e-06	0.000253	0.000228	PA2970/PA3162/PA4242/PA4248/PA4265/PA4266/PA4274/PA4277/PA4432	9	PA0034
GO:0006313	transposition	0.00543	0.038787	0.03103	PA0979/PA1368	2	PA0152
GO:0006352	DNA-templated transcription	0.000996	0.014938	0.013103	PA0376/PA1776/PA3622/PA4462	4	PA4916
GO:0006352	DNA-templated transcription	0.002132	0.029361	0.026137	PA0376/PA0576/PA1455/PA1776/PA3622/PA4462	6	PA0279
GO:0006352	DNA-templated transcription	0.001024	0.023723	0.021405	PA0472/PA0576/PA1455/PA3622/PA3899/PA4462/PA4896	7	PA5218
GO:0006352	DNA-templated transcription	1.02e-06	0.00019	0.000176	PA0149/PA0472/PA0576/PA1300/PA1776/PA1912/PA2426/PA2468/PA3410/PA3899/PA4896	11	PA3699
GO:0003924	GTPase activity	0.000458	0.014804	0.013334	PA4265/PA4266/PA4277/PA4744	4	PA0034
GO:0003735	structural constituent of ribosome	0.000956	0.023187	0.020884	PA2970/PA3162/PA4242/PA4248/PA4274/PA4432	6	PA0034
GO:0005525	GTP binding	0.001443	0.027994	0.025214	PA4265/PA4266/PA4277/PA4744	4	PA0034
GO:0005840	ribosome	0.003477	0.048495	0.043679	PA3162/PA4242/PA4248/PA4274/PA4432	5	PA0034
GO:0005524	ATP binding	0.0035	0.048495	0.043679	PA0001/PA0003/PA0004/PA0008/PA0603/PA0666/PA1769/PA1802/PA2620/PA2740/PA3103/PA3365/PA4997/PA5125	14	PA0034
GO:0009243	O antigen biosynthetic process	1.01e-05	0.000505	0.000404	PA0938/PA3141/PA3151/PA3154/PA3160	5	PA0152
GO:0009103	lipopolysaccharide biosynthetic process	9.88e-05	0.00247	0.001976	PA0938/PA3141/PA3154/PA3160	4	PA0152
GO:0006412	translation	0.000184	0.003061	0.002448	PA4240/PA4248/PA4257/PA4267/PA4277	5	PA0152
GO:0003735	structural constituent of ribosome	0.001208	0.015097	0.012077	PA4240/PA4248/PA4257/PA4267	4	PA0152
GO:0009276	Gram-negative-bacterium-type cell wall	0.002661	0.026612	0.021289	PA0938/PA3141/PA3154/PA3160	4	PA0152
GO:0004803	transposase activity	0.00543	0.038787	0.03103	PA0979/PA1368	2	PA0152
GO:0009297	pilus assembly	0.00723	0.04519	0.036152	PA0994/PA4084	2	PA0152
GO:0042121	alginic acid biosynthetic process	1.15e-07	1.38e-05	1.33e-05	PA3540/PA3541/PA3544/PA3547/PA3548/PA3549/PA3550	7	PA0167
GO:0050896	response to stimulus	2.41e-06	0.000144	0.000139	PA2400/PA2570/PA3531/PA3540/PA3541/PA3544/PA3547/PA3548/PA3549/PA3550/PA3866/PA4566	12	PA0167
GO:0005615	extracellular space	7.99e-05	0.003196	0.003084	PA0844/PA0852/PA1249/PA1342/PA4175	5	PA0167
GO:0005840	ribosome	1.21e-06	0.000211	0.000194	PA2741/PA3162/PA3656/PA3742/PA3744/PA4241/PA4246/PA4248/PA4251/PA4253/PA4262/PA4271/PA4274/PA4432/PA4568	15	PA0207
GO:0003735	structural constituent of ribosome	6.09e-06	0.000474	0.000436	PA2741/PA3162/PA3656/PA3742/PA4241/PA4246/PA4248/PA4251/PA4253/PA4262/PA4267/PA4271/PA4274/PA4432/PA4568	15	PA0207
GO:0006412	translation	8.17e-06	0.000474	0.000436	PA2741/PA3162/PA3656/PA3742/PA4241/PA4246/PA4248/PA4251/PA4253/PA4262/PA4267/PA4271/PA4274/PA4277/PA4432/PA4568	16	PA0207
GO:0003723	RNA binding	0.000123	0.005346	0.004916	PA0715/PA2975/PA3048/PA3162/PA3817/PA4138/PA4241/PA4246/PA4568/PA4727/PA4937/PA4944/PA5118/PA5239	14	PA0207
GO:0044267	cellular protein metabolic process	0.000517	0.017991	0.016544	PA0009/PA0019/PA2620/PA2741/PA2743/PA3162/PA3656/PA3742/PA4138/PA4241/PA4246/PA4248/PA4251/PA4253/PA4262/PA4267/PA4271/PA4274/PA4568	19	PA0207
GO:0006412	translation	6.66e-06	0.001305	0.001268	PA0579/PA3162/PA3601/PA3656/PA3742/PA4240/PA4247/PA4248/PA4262/PA4265/PA4266/PA4267/PA4271/PA4272/PA4274/PA4277/PA4563/PA4741/PA4752/PA5315	20	PA0217
GO:0044267	cellular protein metabolic process	0.000416	0.030281	0.029435	PA0009/PA0019/PA0903/PA2619/PA2620/PA2740/PA2755/PA2851/PA3161/PA3162/PA3656/PA3742/PA4138/PA4240/PA4247/PA4248/PA4262/PA4265/PA4266/PA4267/PA4271/PA4272/PA4274/PA4741/PA4845	25	PA0217
GO:0005840	ribosome	0.000559	0.030281	0.029435	PA0579/PA3162/PA3601/PA3656/PA3742/PA4240/PA4247/PA4248/PA4262/PA4271/PA4274/PA4563/PA4741/PA5315	14	PA0217
GO:0003735	structural constituent of ribosome	0.000618	0.030281	0.029435	PA0579/PA3162/PA3601/PA3656/PA3742/PA4240/PA4247/PA4248/PA4262/PA4267/PA4271/PA4274/PA4563/PA4741/PA5315	15	PA0217
GO:0045226	extracellular polysaccharide biosynthetic process	0.00019	0.033111	0.032851	PA1107/PA2240/PA2242/PA3059/PA3060/PA3061/PA3062/PA3063	8	PA0218
GO:0006412	translation	6.02e-08	1.13e-05	1.06e-05	PA2741/PA3162/PA3601/PA3653/PA3656/PA3742/PA4237/PA4240/PA4248/PA4260/PA4263/PA4265/PA4266/PA4268/PA4274/PA4277/PA4432/PA4752/PA4934/PA5049/PA5315	21	PA0233
GO:0005840	ribosome	5.93e-07	5.58e-05	5.22e-05	PA2741/PA3162/PA3601/PA3656/PA3742/PA3744/PA4237/PA4240/PA4248/PA4260/PA4263/PA4268/PA4274/PA4432/PA4934/PA5049/PA5315	17	PA0233
GO:0003735	structural constituent of ribosome	1.72e-05	0.001077	0.001007	PA2741/PA3162/PA3601/PA3656/PA3742/PA4237/PA4240/PA4248/PA4260/PA4263/PA4268/PA4274/PA4432/PA4934/PA5049/PA5315	16	PA0233
GO:0044267	cellular protein metabolic process	0.000152	0.007148	0.006683	PA0009/PA2620/PA2741/PA3049/PA3162/PA3635/PA3653/PA3656/PA3724/PA3742/PA3824/PA4138/PA4237/PA4240/PA4248/PA4260/PA4263/PA4265/PA4266/PA4268/PA4274/PA4559/PA4672	23	PA0233
GO:0003924	GTPase activity	0.000639	0.024041	0.022479	PA0767/PA4265/PA4266/PA4277/PA4407/PA4566/PA5567	7	PA0233
GO:0005525	GTP binding	0.000867	0.02716	0.025396	PA0767/PA4265/PA4266/PA4277/PA4407/PA4566/PA4943/PA5567	8	PA0233
GO:0000976	transcription regulatory region sequence-specific DNA binding	0.001588	0.042659	0.039889	PA0424/PA1003/PA1544/PA1713/PA1898/PA2127/PA3006/PA3574/PA4596/PA4764	10	PA0233
GO:0006412	translation	1.47e-07	2.65e-05	2.57e-05	PA2742/PA2970/PA3601/PA4240/PA4245/PA4250/PA4259/PA4262/PA4263/PA4265/PA4266/PA4267/PA4272/PA4274/PA4277/PA4432/PA4568/PA5316	18	PA0243
GO:0009243	O antigen biosynthetic process	1.55e-05	0.000984	0.000955	PA0938/PA3141/PA3146/PA3148/PA3149/PA3151/PA3152/PA3153/PA3154/PA3159/PA5161	11	PA0243
GO:0003735	structural constituent of ribosome	1.64e-05	0.000984	0.000955	PA2742/PA2970/PA3601/PA4240/PA4245/PA4250/PA4259/PA4262/PA4263/PA4267/PA4274/PA4432/PA4568/PA5316	14	PA0243
GO:0005840	ribosome	0.000445	0.020029	0.019444	PA2742/PA3601/PA4240/PA4250/PA4259/PA4262/PA4263/PA4274/PA4432/PA4568/PA5316	11	PA0243
GO:0044267	cellular protein metabolic process	0.000758	0.027294	0.026496	PA2620/PA2740/PA2742/PA2970/PA3161/PA4138/PA4240/PA4245/PA4250/PA4259/PA4262/PA4263/PA4265/PA4266/PA4267/PA4272/PA4274/PA4568	18	PA0243
GO:0006412	translation	6.07e-08	9.83e-06	8.75e-06	PA3162/PA3656/PA4237/PA4240/PA4251/PA4254/PA4258/PA4259/PA4261/PA4265/PA4266/PA4272/PA4273/PA4277/PA4563/PA4752/PA5315	17	PA0279
GO:0003723	RNA binding	9.29e-06	0.000753	0.00067	PA0715/PA2619/PA2975/PA3048/PA3162/PA3817/PA4273/PA4544/PA4563/PA4727/PA4745/PA4937/PA5118/PA5239	14	PA0279
GO:0044267	cellular protein metabolic process	2.36e-05	0.001272	0.001132	PA0008/PA0009/PA2619/PA2620/PA2740/PA3161/PA3162/PA3656/PA4237/PA4240/PA4251/PA4254/PA4258/PA4259/PA4261/PA4265/PA4266/PA4272/PA4273	19	PA0279
GO:0003735	structural constituent of ribosome	5.92e-05	0.002396	0.002133	PA3162/PA3656/PA4237/PA4240/PA4251/PA4254/PA4258/PA4259/PA4261/PA4273/PA4563/PA5315	12	PA0279
GO:0005840	ribosome	9.17e-05	0.002971	0.002645	PA3162/PA3656/PA4237/PA4240/PA4251/PA4254/PA4258/PA4259/PA4261/PA4563/PA5315	11	PA0279
GO:0051301	cell division	0.000189	0.005102	0.004542	PA0973/PA3245/PA4414/PA4417/PA4418/PA5044	6	PA0279
GO:2000147	positive regulation of cell motility	0.000588	0.013616	0.01212	PA0928/PA1455/PA3385/PA5261/PA5550	5	PA0279
GO:0043093	FtsZ-dependent cytokinesis	0.001245	0.025219	0.02245	PA1800/PA3245/PA4407/PA4418/PA4481	5	PA0279
GO:1900233	positive regulation of single-species biofilm formation on inanimate substrate	0.001849	0.029361	0.026137	PA2586/PA3385/PA3622/PA4843	4	PA0279
GO:0005525	GTP binding	0.002132	0.029361	0.026137	PA4265/PA4266/PA4277/PA4407/PA4566/PA4943	6	PA0279
GO:0003677	DNA binding	0.002175	0.029361	0.026137	PA0001/PA0002/PA0376/PA0576/PA1430/PA1455/PA1544/PA1937/PA2586/PA2591/PA3133/PA3138/PA3140/PA3161/PA3168/PA3385/PA3477/PA3622/PA4269/PA4270/PA4462/PA5261/PA5301/PA5337/PA5348/PA5493/PA5506/PA5562	28	PA0279
GO:1900378	positive regulation of secondary metabolite biosynthetic process	0.002773	0.033179	0.029536	PA0928/PA2591/PA3477/PA5255	4	PA0279
GO:0003924	GTPase activity	0.003072	0.033179	0.029536	PA4265/PA4266/PA4277/PA4407/PA4566	5	PA0279
GO:0006099	tricarboxylic acid cycle	0.003072	0.033179	0.029536	PA1580/PA1584/PA1585/PA1787/PA2623	5	PA0279
GO:0016987	sigma factor activity	0.003303	0.033445	0.029772	PA0376/PA0576/PA1455/PA1776/PA3622/PA4462	6	PA0279
GO:0016070	RNA metabolic process	0.005024	0.045423	0.040435	PA2975/PA3161/PA4544/PA4745/PA4937/PA5334/PA5337	7	PA0279
GO:0004129	cytochrome-c oxidase activity	0.005047	0.045423	0.040435	PA1317/PA1554/PA1555.1/PA1556/PA1557	5	PA0279
GO:0006412	translation	5.95e-11	1.01e-08	9.71e-09	PA3162/PA3601/PA3656/PA3742/PA4237/PA4240/PA4244/PA4248/PA4253/PA4257/PA4259/PA4261/PA4262/PA4267/PA4273/PA4277/PA4568/PA4741/PA4752/PA5315	20	PA0306
GO:0003735	structural constituent of ribosome	3.22e-10	2.72e-08	2.63e-08	PA3162/PA3601/PA3656/PA3742/PA4237/PA4240/PA4244/PA4248/PA4253/PA4257/PA4259/PA4261/PA4262/PA4267/PA4273/PA4568/PA4741/PA5315	18	PA0306
GO:0005840	ribosome	2.25e-07	1.27e-05	1.22e-05	PA3162/PA3601/PA3656/PA3742/PA4237/PA4240/PA4248/PA4253/PA4259/PA4261/PA4262/PA4568/PA4741/PA5315	14	PA0306
GO:0044267	cellular protein metabolic process	6.81e-07	2.88e-05	2.78e-05	PA0019/PA2620/PA2740/PA3162/PA3656/PA3742/PA4138/PA4237/PA4240/PA4244/PA4248/PA4253/PA4257/PA4259/PA4261/PA4262/PA4267/PA4273/PA4568/PA4741/PA4744	21	PA0306
GO:0003723	RNA binding	0.000122	0.004139	0.003996	PA2975/PA3162/PA3817/PA4138/PA4257/PA4273/PA4568/PA4727/PA4741/PA4937/PA5118/PA5239	12	PA0306
GO:0006412	translation	2.58e-08	5.07e-06	4.95e-06	PA3162/PA3601/PA3653/PA3656/PA4237/PA4240/PA4244/PA4248/PA4250/PA4256/PA4259/PA4262/PA4265/PA4267/PA4271/PA4273/PA4277/PA4567/PA4752/PA4935/PA5315	21	PA0367
GO:0003735	structural constituent of ribosome	1.92e-06	0.000188	0.000184	PA3162/PA3601/PA3656/PA4237/PA4240/PA4244/PA4248/PA4250/PA4256/PA4259/PA4262/PA4267/PA4271/PA4273/PA4567/PA4935/PA5315	17	PA0367
GO:0005840	ribosome	4.26e-05	0.002784	0.002721	PA3162/PA3601/PA3656/PA4237/PA4240/PA4248/PA4250/PA4256/PA4259/PA4262/PA4271/PA4567/PA4935/PA5315	14	PA0367
GO:0044267	cellular protein metabolic process	0.000559	0.027413	0.026795	PA0019/PA2620/PA3162/PA3653/PA3656/PA3802/PA3824/PA4138/PA4237/PA4240/PA4244/PA4248/PA4250/PA4256/PA4259/PA4262/PA4265/PA4267/PA4271/PA4273/PA4567	21	PA0367
GO:0006412	translation	8.84e-13	1.58e-10	1.49e-10	PA0579/PA2741/PA3162/PA3742/PA3745/PA4237/PA4241/PA4242/PA4248/PA4249/PA4252/PA4256/PA4257/PA4260/PA4261/PA4266/PA4267/PA4273/PA4277/PA4433/PA4568/PA4671/PA4741/PA4935/PA5316	25	PA0475
GO:0003735	structural constituent of ribosome	2.02e-12	1.81e-10	1.7e-10	PA0579/PA2741/PA3162/PA3742/PA3745/PA4237/PA4241/PA4242/PA4248/PA4249/PA4252/PA4256/PA4257/PA4260/PA4261/PA4267/PA4273/PA4433/PA4568/PA4671/PA4741/PA4935/PA5316	23	PA0475
GO:0005840	ribosome	1.01e-10	6.03e-09	5.68e-09	PA0579/PA2741/PA3162/PA3742/PA3745/PA4237/PA4241/PA4242/PA4248/PA4249/PA4252/PA4256/PA4260/PA4261/PA4433/PA4568/PA4671/PA4741/PA4935/PA5316	20	PA0475
GO:0003723	RNA binding	1.3e-08	5.83e-07	5.49e-07	PA0715/PA2975/PA2976/PA3162/PA3817/PA4138/PA4241/PA4252/PA4257/PA4260/PA4273/PA4544/PA4568/PA4727/PA4741/PA4935/PA4937/PA4944/PA5118/PA5239	20	PA0475
GO:0044267	cellular protein metabolic process	5.13e-08	1.84e-06	1.73e-06	PA0008/PA0009/PA0019/PA2741/PA2743/PA3162/PA3655/PA3742/PA3745/PA3824/PA4138/PA4237/PA4241/PA4242/PA4248/PA4249/PA4252/PA4256/PA4257/PA4260/PA4261/PA4266/PA4267/PA4273/PA4568/PA4741/PA4744	27	PA0475
GO:0050896	response to stimulus	3.49e-05	0.005754	0.005323	PA0139/PA0595/PA2400/PA2570/PA3266/PA3477/PA3531/PA3540/PA3548/PA3549/PA3818/PA3866/PA4236/PA4566/PA4613	15	PA0527
GO:0006412	translation	2.85e-06	0.000515	0.000491	PA2741/PA3162/PA3656/PA3742/PA4241/PA4249/PA4256/PA4263/PA4264/PA4267/PA4268/PA4274/PA4277/PA4433/PA4563/PA4752	16	PA0701
GO:0003735	structural constituent of ribosome	1.18e-05	0.000901	0.000859	PA2741/PA3162/PA3656/PA3742/PA4241/PA4249/PA4256/PA4263/PA4264/PA4267/PA4268/PA4274/PA4433/PA4563	14	PA0701
GO:0005840	ribosome	1.49e-05	0.000901	0.000859	PA2741/PA3162/PA3656/PA3742/PA4241/PA4249/PA4256/PA4263/PA4264/PA4268/PA4274/PA4433/PA4563	13	PA0701
GO:0009243	O antigen biosynthetic process	2.85e-05	0.001853	0.00177	PA3149/PA3152/PA3153/PA3154/PA3160	5	PA0707
GO:0009276	Gram-negative-bacterium-type cell wall	0.000705	0.022904	0.021884	PA3150/PA3153/PA3154/PA3160/PA3540	5	PA0707
GO:0006412	translation	2.03e-09	3.52e-07	3.24e-07	PA0579/PA2742/PA3162/PA3653/PA3656/PA3742/PA3745/PA4237/PA4241/PA4248/PA4249/PA4250/PA4257/PA4264/PA4268/PA4277/PA4433/PA4568/PA4752	19	PA0815
GO:0003735	structural constituent of ribosome	7.11e-08	5.05e-06	4.64e-06	PA0579/PA2742/PA3162/PA3656/PA3742/PA3745/PA4237/PA4241/PA4248/PA4249/PA4250/PA4257/PA4264/PA4268/PA4433/PA4568	16	PA0815
GO:0005840	ribosome	8.7e-08	5.05e-06	4.64e-06	PA0579/PA2742/PA3162/PA3656/PA3742/PA3745/PA4237/PA4241/PA4248/PA4249/PA4250/PA4264/PA4268/PA4433/PA4568	15	PA0815
GO:0044267	cellular protein metabolic process	3.56e-05	0.001549	0.001424	PA0009/PA2620/PA2738/PA2742/PA3162/PA3653/PA3656/PA3742/PA3745/PA4138/PA4237/PA4241/PA4248/PA4249/PA4250/PA4257/PA4264/PA4268/PA4568	19	PA0815
GO:0003723	RNA binding	6.17e-05	0.002146	0.001973	PA0715/PA2975/PA3162/PA3817/PA4138/PA4241/PA4257/PA4568/PA4727/PA4937/PA4944/PA5118/PA5239	13	PA0815
GO:0016070	RNA metabolic process	0.001341	0.038889	0.03576	PA2738/PA2975/PA3743/PA4264/PA4275/PA4853/PA4937/PA5337	8	PA0815
GO:0006412	translation	1.03e-06	0.00018	0.000176	PA2741/PA3162/PA3653/PA3656/PA3742/PA4240/PA4242/PA4244/PA4248/PA4253/PA4263/PA4267/PA4274/PA4277/PA4432/PA4752	16	PA0816
GO:0003735	structural constituent of ribosome	2.54e-05	0.002227	0.00217	PA2741/PA3162/PA3656/PA3742/PA4240/PA4242/PA4244/PA4248/PA4253/PA4263/PA4267/PA4274/PA4432	13	PA0816
GO:0044267	cellular protein metabolic process	6.59e-05	0.003842	0.003744	PA0009/PA0019/PA2620/PA2741/PA3049/PA3162/PA3653/PA3656/PA3700/PA3742/PA4138/PA4240/PA4242/PA4244/PA4248/PA4253/PA4263/PA4267/PA4274	19	PA0816
GO:0005840	ribosome	0.000178	0.00778	0.007581	PA2741/PA3162/PA3656/PA3742/PA4240/PA4242/PA4248/PA4253/PA4263/PA4274/PA4432	11	PA0816
GO:0003924	GTPase activity	1.34e-05	0.002316	0.00217	PA0767/PA3746/PA4265/PA4277/PA4407/PA4566/PA4744/PA5567	8	PA0876
GO:0005525	GTP binding	0.000154	0.013362	0.012521	PA0767/PA3746/PA4265/PA4277/PA4407/PA4566/PA4744/PA5567	8	PA0876
GO:0005524	ATP binding	0.000399	0.023023	0.021573	PA0008/PA0428/PA0455/PA0666/PA1156/PA1393/PA1769/PA2359/PA2615/PA2620/PA2740/PA2840/PA3138/PA3168/PA3384/PA3514/PA3919/PA4037/PA4138/PA4385/PA4403/PA4414/PA4417/PA4456/PA4576/PA4581/PA4609/PA4726/PA4751/PA4931/PA4946/PA4997/PA5051/PA5231/PA5239/PA5436/PA5503	37	PA0876
GO:0005615	extracellular space	0.000758	0.032781	0.030717	PA0844/PA0888/PA1249/PA1493/PA4031/PA4175	6	PA0876
GO:0006412	translation	1.43e-06	0.000127	0.000114	PA3162/PA4237/PA4242/PA4248/PA4263/PA4265/PA4267/PA4277/PA4432	9	PA0877
GO:0044267	cellular protein metabolic process	2.95e-05	0.001311	0.001179	PA2620/PA2738/PA2740/PA3162/PA4237/PA4242/PA4248/PA4263/PA4265/PA4267	10	PA0877
GO:0003735	structural constituent of ribosome	4.99e-05	0.00148	0.00133	PA3162/PA4237/PA4242/PA4248/PA4263/PA4267/PA4432	7	PA0877
GO:0005840	ribosome	0.000222	0.00494	0.00444	PA3162/PA4237/PA4242/PA4248/PA4263/PA4432	6	PA0877
GO:0006412	translation	2.42e-05	0.002703	0.002517	PA3162/PA3653/PA3656/PA4242/PA4245/PA4249/PA4252/PA4259/PA4263/PA4266/PA4268/PA4272/PA4274/PA4277/PA4433/PA4567/PA4741/PA4935/PA5316	19	PA0893
GO:0043107	type IV pilus-dependent motility	2.6e-05	0.002703	0.002517	PA0396/PA1803/PA3805/PA4525/PA4551/PA4553/PA4761/PA5041/PA5043/PA5261/PA5531	11	PA0893
GO:0005840	ribosome	0.000145	0.007877	0.007335	PA3162/PA3656/PA3744/PA4242/PA4249/PA4252/PA4259/PA4263/PA4268/PA4274/PA4433/PA4567/PA4741/PA4935/PA5316	15	PA0893
GO:0044267	cellular protein metabolic process	0.000151	0.007877	0.007335	PA0008/PA0009/PA0019/PA2620/PA2740/PA2743/PA2744/PA2851/PA3162/PA3653/PA3656/PA3824/PA4138/PA4242/PA4245/PA4249/PA4252/PA4259/PA4263/PA4266/PA4268/PA4272/PA4274/PA4567/PA4741/PA4845	26	PA0893
GO:0044096	type IV pilus	0.00048	0.019966	0.018592	PA3115/PA4525/PA4551/PA4553/PA5041/PA5043	6	PA0893
GO:0003735	structural constituent of ribosome	0.000589	0.020405	0.019001	PA3162/PA3656/PA4242/PA4245/PA4249/PA4252/PA4259/PA4263/PA4268/PA4274/PA4433/PA4567/PA4741/PA4935/PA5316	15	PA0893
GO:0003723	RNA binding	0.000294	0.038492	0.03557	PA2975/PA3162/PA4138/PA4241/PA4937/PA4944/PA5118/PA5239	8	PA1109
GO:0006412	translation	1.15e-05	0.002083	0.002023	PA2741/PA3162/PA3600/PA3656/PA3742/PA4239/PA4240/PA4247/PA4255/PA4259/PA4262/PA4265/PA4267/PA4271/PA4277/PA5315	16	PA1157
GO:0003735	structural constituent of ribosome	3.99e-05	0.003612	0.003508	PA2741/PA3162/PA3600/PA3656/PA3742/PA4239/PA4240/PA4247/PA4255/PA4259/PA4262/PA4267/PA4271/PA5315	14	PA1157
GO:0005840	ribosome	0.000213	0.012859	0.012489	PA2741/PA3162/PA3600/PA3656/PA3742/PA4240/PA4247/PA4255/PA4259/PA4262/PA4271/PA5315	12	PA1157
GO:0006412	translation	3.93e-17	4.71e-15	4.05e-15	PA3162/PA4237/PA4240/PA4242/PA4247/PA4249/PA4251/PA4252/PA4256/PA4259/PA4260/PA4261/PA4262/PA4263/PA4265/PA4266/PA4267/PA4268/PA4272/PA4274/PA4568	21	PA1229
GO:0044267	cellular protein metabolic process	1.59e-15	9.54e-14	8.2e-14	PA0008/PA2620/PA2740/PA2743/PA3162/PA4237/PA4240/PA4242/PA4247/PA4249/PA4251/PA4252/PA4256/PA4259/PA4260/PA4261/PA4262/PA4263/PA4265/PA4266/PA4267/PA4268/PA4272/PA4274/PA4568	25	PA1229
GO:0003735	structural constituent of ribosome	1.22e-14	4.88e-13	4.2e-13	PA3162/PA4237/PA4240/PA4242/PA4247/PA4249/PA4251/PA4252/PA4256/PA4259/PA4260/PA4261/PA4262/PA4263/PA4267/PA4268/PA4274/PA4568	18	PA1229
GO:0005840	ribosome	2.31e-14	6.92e-13	5.95e-13	PA3162/PA4237/PA4240/PA4242/PA4247/PA4249/PA4251/PA4252/PA4256/PA4259/PA4260/PA4261/PA4262/PA4263/PA4268/PA4274/PA4568	17	PA1229
GO:0005737	cytoplasm	0.000177	0.004236	0.003642	PA0008/PA0178/PA0414/PA0589/PA1546/PA2740/PA3050/PA4410/PA4417/PA5038/PA5079	11	PA1229
GO:0006412	translation	5.8e-05	0.009458	0.009345	PA2741/PA3162/PA3653/PA3656/PA3742/PA4237/PA4248/PA4263/PA4267/PA4277/PA4432/PA5315	12	PA1261
GO:0003735	structural constituent of ribosome	0.000363	0.029559	0.029205	PA2741/PA3162/PA3656/PA3742/PA4237/PA4248/PA4263/PA4267/PA4432/PA5315	10	PA1261
GO:0005840	ribosome	0.000662	0.035975	0.035545	PA2741/PA3162/PA3656/PA3742/PA4237/PA4248/PA4263/PA4432/PA5315	9	PA1261
GO:0006412	translation	0.000139	0.026075	0.025111	PA2741/PA3162/PA3653/PA3656/PA3742/PA4241/PA4248/PA4251/PA4259/PA4266/PA4267/PA4277/PA4432/PA4568/PA4741/PA5316	16	PA1283
GO:0003723	RNA binding	0.000398	0.037378	0.035996	PA0715/PA2975/PA3048/PA3114/PA3162/PA3817/PA4138/PA4241/PA4544/PA4568/PA4727/PA4741/PA4937/PA5118/PA5239	15	PA1283
GO:0009243	O antigen biosynthetic process	3.07e-08	4.41e-06	4.2e-06	PA3141/PA3145/PA3148/PA3151/PA3152/PA3153/PA3154/PA3155/PA3156/PA3159/PA3160	11	PA1285
GO:0006412	translation	2.84e-06	0.000205	0.000195	PA2741/PA3162/PA4242/PA4244/PA4245/PA4252/PA4256/PA4258/PA4263/PA4266/PA4267/PA4568	12	PA1285
GO:0003735	structural constituent of ribosome	4.56e-06	0.000219	0.000208	PA2741/PA3162/PA4242/PA4244/PA4245/PA4252/PA4256/PA4258/PA4263/PA4267/PA4568	11	PA1285
GO:0044267	cellular protein metabolic process	1.74e-05	0.000626	0.000595	PA0009/PA2741/PA2744/PA3162/PA3655/PA4242/PA4244/PA4245/PA4252/PA4256/PA4258/PA4263/PA4266/PA4267/PA4568	15	PA1285
GO:0009276	Gram-negative-bacterium-type cell wall	0.000199	0.005719	0.005435	PA0936/PA3141/PA3145/PA3150/PA3153/PA3154/PA3160/PA3540/PA4522/PA4996	10	PA1285
GO:0005840	ribosome	0.000424	0.010187	0.00968	PA2741/PA3162/PA4242/PA4252/PA4256/PA4258/PA4263/PA4568	8	PA1285
GO:0000271	polysaccharide biosynthetic process	0.000531	0.01055	0.010025	PA3148/PA3155/PA3156/PA3159	4	PA1285
GO:0020037	heme binding	0.000586	0.01055	0.010025	PA1554/PA1557/PA1838/PA2906/PA3032/PA4429/PA4613/PA5300/PA5490	9	PA1285
GO:0003723	RNA binding	0.002097	0.033546	0.031879	PA0584/PA2975/PA3048/PA3162/PA4252/PA4568/PA5118/PA5239	8	PA1285
GO:0009243	O antigen biosynthetic process	4.58e-05	0.007415	0.007034	PA0938/PA3141/PA3149/PA3152/PA3153/PA3154/PA3155/PA3159/PA5161	9	PA1347
GO:0042121	alginic acid biosynthetic process	2.3e-05	0.003935	0.003827	PA3540/PA3541/PA3542/PA3545/PA3547/PA3548/PA3549	7	PA1403
GO:0050896	response to stimulus	0.000425	0.036311	0.035316	PA2400/PA2570/PA3266/PA3477/PA3531/PA3540/PA3541/PA3542/PA3545/PA3547/PA3548/PA3549/PA3866/PA4613	14	PA1403
GO:0006412	translation	2.86e-05	0.003961	0.00372	PA3162/PA4241/PA4242/PA4249/PA4251/PA4253/PA4263/PA4267/PA4277/PA4433	10	PA1484
GO:0003735	structural constituent of ribosome	5.7e-05	0.003961	0.00372	PA3162/PA4241/PA4242/PA4249/PA4251/PA4253/PA4263/PA4267/PA4433	9	PA1484
GO:0005840	ribosome	0.000152	0.007051	0.006621	PA3162/PA4241/PA4242/PA4249/PA4251/PA4253/PA4263/PA4433	8	PA1484
GO:0044267	cellular protein metabolic process	0.001003	0.034844	0.03272	PA2620/PA2743/PA3162/PA4138/PA4241/PA4242/PA4249/PA4251/PA4253/PA4263/PA4267	11	PA1484
GO:0006412	translation	1.91e-06	0.0003	0.000283	PA2741/PA3162/PA4237/PA4239/PA4241/PA4249/PA4250/PA4255/PA4263/PA4265/PA4267/PA4274/PA4277/PA4433	14	PA1504
GO:0003735	structural constituent of ribosome	1.3e-05	0.001022	0.000966	PA2741/PA3162/PA4237/PA4239/PA4241/PA4249/PA4250/PA4255/PA4263/PA4267/PA4274/PA4433	12	PA1504
GO:0044267	cellular protein metabolic process	4.04e-05	0.002112	0.001997	PA2620/PA2740/PA2741/PA2743/PA3049/PA3162/PA4138/PA4237/PA4239/PA4241/PA4249/PA4250/PA4255/PA4263/PA4265/PA4267/PA4274	17	PA1504
GO:0005840	ribosome	0.000128	0.005018	0.004743	PA2741/PA3162/PA4237/PA4241/PA4249/PA4250/PA4255/PA4263/PA4274/PA4433	10	PA1504
GO:0006412	translation	0.00035	0.024178	0.021394	PA2970/PA3162/PA4241/PA4268/PA4277	5	PA1619
GO:0044267	cellular protein metabolic process	0.000768	0.026486	0.023435	PA2620/PA2740/PA2970/PA3162/PA4241/PA4268	6	PA1619
GO:0003735	structural constituent of ribosome	0.002004	0.046085	0.040777	PA2970/PA3162/PA4241/PA4268	4	PA1619
GO:0044267	cellular protein metabolic process	2.18e-05	0.002499	0.002328	PA0903/PA2739/PA3656/PA3700/PA3724/PA3737/PA3742/PA3745/PA3903/PA4242/PA4245/PA4253/PA4259/PA4261/PA4262/PA4264/PA4265/PA4266/PA4271/PA4273	20	PA1653
GO:0006412	translation	2.87e-05	0.002499	0.002328	PA3656/PA3742/PA3745/PA4242/PA4245/PA4253/PA4259/PA4261/PA4262/PA4264/PA4265/PA4266/PA4271/PA4273	14	PA1653
GO:0003735	structural constituent of ribosome	0.000131	0.007574	0.007056	PA3656/PA3742/PA3745/PA4242/PA4245/PA4253/PA4259/PA4261/PA4262/PA4264/PA4271/PA4273	12	PA1653
GO:0005840	ribosome	0.000191	0.008295	0.007728	PA3656/PA3742/PA3744/PA3745/PA4242/PA4253/PA4259/PA4261/PA4262/PA4264/PA4271	11	PA1653
GO:0003924	GTPase activity	0.000615	0.021411	0.019948	PA0767/PA3746/PA3903/PA4265/PA4266/PA4566	6	PA1653
GO:0006412	translation	1.66e-05	0.002944	0.002749	PA3162/PA3600/PA3656/PA4244/PA4245/PA4249/PA4255/PA4256/PA4265/PA4267/PA4268/PA4274/PA4277/PA4433	14	PA1759
GO:0003735	structural constituent of ribosome	8.2e-05	0.00726	0.006779	PA3162/PA3600/PA3656/PA4244/PA4245/PA4249/PA4255/PA4256/PA4267/PA4268/PA4274/PA4433	12	PA1759
GO:0009243	O antigen biosynthetic process	1.99e-08	3.42e-06	3.2e-06	PA3141/PA3146/PA3148/PA3149/PA3151/PA3153/PA3154/PA3155/PA3156/PA3158/PA3159/PA3160/PA5161/PA5454	14	PA1836
GO:0006412	translation	2.58e-06	0.000222	0.000208	PA2741/PA3656/PA4240/PA4245/PA4247/PA4250/PA4263/PA4265/PA4266/PA4267/PA4271/PA4272/PA4277/PA4432/PA4433/PA5049	16	PA1836
GO:0003735	structural constituent of ribosome	0.000233	0.013331	0.012483	PA2741/PA3656/PA4240/PA4245/PA4247/PA4250/PA4263/PA4267/PA4271/PA4432/PA4433/PA5049	12	PA1836
GO:0000271	polysaccharide biosynthetic process	0.000454	0.016898	0.015823	PA3148/PA3155/PA3156/PA3158/PA3159	5	PA1836
GO:0044267	cellular protein metabolic process	0.000491	0.016898	0.015823	PA0355/PA2620/PA2741/PA3656/PA3724/PA4138/PA4240/PA4245/PA4247/PA4250/PA4263/PA4265/PA4266/PA4267/PA4271/PA4272/PA5018/PA5489	18	PA1836
GO:0005615	extracellular space	0.000601	0.017232	0.016136	PA0888/PA1249/PA1493/PA4031/PA4175/PA4687	6	PA1836
GO:0005840	ribosome	0.00134	0.032938	0.030842	PA2741/PA3656/PA4240/PA4247/PA4250/PA4263/PA4271/PA4432/PA4433/PA5049	10	PA1836
GO:0009243	O antigen biosynthetic process	0.000219	0.03752	0.035568	PA0938/PA3141/PA3145/PA3146/PA3155/PA3156/PA3158/PA3159/PA5000	9	PA1853
GO:0006412	translation	2.63e-05	0.003048	0.002831	PA2741/PA2742/PA3162/PA3742/PA4241/PA4248/PA4251/PA4264/PA4268/PA4274/PA4277/PA4432/PA4433/PA4752	14	PA1859
GO:0005840	ribosome	3.59e-05	0.003048	0.002831	PA2741/PA2742/PA3162/PA3742/PA4241/PA4248/PA4251/PA4264/PA4268/PA4274/PA4432/PA4433	12	PA1859
GO:0003735	structural constituent of ribosome	0.000121	0.006862	0.006373	PA2741/PA2742/PA3162/PA3742/PA4241/PA4248/PA4251/PA4264/PA4268/PA4274/PA4432/PA4433	12	PA1859
GO:0006412	translation	4.25e-11	2e-09	1.79e-09	PA4237/PA4252/PA4253/PA4255/PA4256/PA4258/PA4260/PA4261/PA4265/PA4266	10	PA1978
GO:0005840	ribosome	3.9e-09	9.17e-08	8.22e-08	PA4237/PA4252/PA4253/PA4255/PA4256/PA4258/PA4260/PA4261	8	PA1978
GO:0003735	structural constituent of ribosome	1.02e-08	1.59e-07	1.43e-07	PA4237/PA4252/PA4253/PA4255/PA4256/PA4258/PA4260/PA4261	8	PA1978
GO:0044267	cellular protein metabolic process	1.57e-08	1.84e-07	1.65e-07	PA4237/PA4252/PA4253/PA4255/PA4256/PA4258/PA4260/PA4261/PA4265/PA4266	10	PA1978
GO:1902600	proton transmembrane transport	0.005129	0.048215	0.043194	PA5518/PA5554	2	PA1978
GO:0045226	extracellular polysaccharide biosynthetic process	2.01e-05	0.003738	0.003681	PA1107/PA2239/PA2240/PA2242/PA3059/PA3060/PA3061/PA3062/PA3063/PA3064	10	PA2010
GO:0006412	translation	1.48e-11	2.74e-09	2.48e-09	PA0579/PA2741/PA3162/PA3601/PA3656/PA3742/PA4237/PA4239/PA4240/PA4244/PA4248/PA4251/PA4253/PA4259/PA4262/PA4266/PA4273/PA4274/PA4277/PA4432/PA4568/PA4752/PA4935/PA5315	24	PA2032
GO:0003735	structural constituent of ribosome	2.79e-10	2.58e-08	2.34e-08	PA0579/PA2741/PA3162/PA3601/PA3656/PA3742/PA4237/PA4239/PA4240/PA4244/PA4248/PA4251/PA4253/PA4259/PA4262/PA4273/PA4274/PA4432/PA4568/PA4935/PA5315	21	PA2032
GO:0005840	ribosome	1.14e-08	7.01e-07	6.34e-07	PA0579/PA2741/PA3162/PA3601/PA3656/PA3742/PA4237/PA4240/PA4248/PA4251/PA4253/PA4259/PA4262/PA4274/PA4432/PA4568/PA4935/PA5315	18	PA2032
GO:0044267	cellular protein metabolic process	1.46e-06	6.75e-05	6.1e-05	PA0009/PA1670/PA2620/PA2738/PA2741/PA2743/PA3049/PA3162/PA3656/PA3742/PA4138/PA4237/PA4239/PA4240/PA4244/PA4248/PA4251/PA4253/PA4259/PA4262/PA4266/PA4273/PA4274/PA4568/PA4768	25	PA2032
GO:0003723	RNA binding	1.57e-05	0.000582	0.000526	PA0715/PA2975/PA3162/PA3817/PA4138/PA4239/PA4273/PA4568/PA4727/PA4740/PA4745/PA4768/PA4935/PA4937/PA5118/PA5239	16	PA2032
GO:0009289	pilus	0.000548	0.016885	0.015276	PA0497/PA0498/PA2128/PA4086/PA5284	5	PA2032
GO:0009243	O antigen biosynthetic process	3.96e-08	3.16e-06	2.79e-06	PA3146/PA3148/PA3152/PA3153/PA3154/PA3155/PA3159/PA3160	8	PA2047
GO:0005840	ribosome	9.72e-05	0.003888	0.003428	PA3162/PA4237/PA4242/PA4249/PA4256/PA4432	6	PA2047
GO:0003735	structural constituent of ribosome	0.000187	0.004993	0.004402	PA3162/PA4237/PA4242/PA4249/PA4256/PA4432	6	PA2047
GO:0006412	translation	0.000398	0.007959	0.007016	PA3162/PA4237/PA4242/PA4249/PA4256/PA4432	6	PA2047
GO:0000271	polysaccharide biosynthetic process	0.000557	0.008908	0.007853	PA3148/PA3155/PA3159	3	PA2047
GO:0009243	O antigen biosynthetic process	1.67e-09	1.34e-07	1.18e-07	PA3146/PA3148/PA3149/PA3152/PA3153/PA3154/PA3155/PA3159	8	PA2054
GO:0000271	polysaccharide biosynthetic process	0.000178	0.007132	0.006288	PA3148/PA3155/PA3159	3	PA2054
GO:0009297	pilus assembly	0.000477	0.012725	0.011218	PA4084/PA4528/PA4550	3	PA2054
GO:0006412	translation	1.14e-11	1.98e-09	1.8e-09	PA3162/PA3653/PA3656/PA3742/PA4237/PA4240/PA4245/PA4247/PA4251/PA4256/PA4260/PA4262/PA4265/PA4266/PA4268/PA4274/PA4277/PA4433/PA4568/PA4741/PA4934/PA5049/PA5315	23	PA2056
GO:0005840	ribosome	2.26e-10	1.96e-08	1.78e-08	PA3162/PA3656/PA3742/PA3744/PA4237/PA4240/PA4247/PA4251/PA4256/PA4260/PA4262/PA4268/PA4274/PA4433/PA4568/PA4741/PA4934/PA5049/PA5315	19	PA2056
GO:0003735	structural constituent of ribosome	2.27e-09	1.31e-07	1.19e-07	PA3162/PA3656/PA3742/PA4237/PA4240/PA4245/PA4247/PA4251/PA4256/PA4260/PA4262/PA4268/PA4274/PA4433/PA4568/PA4741/PA4934/PA5049/PA5315	19	PA2056
GO:0044267	cellular protein metabolic process	4.23e-08	1.84e-06	1.67e-06	PA0008/PA0009/PA2619/PA2620/PA2740/PA3162/PA3653/PA3656/PA3742/PA3818/PA4237/PA4240/PA4245/PA4247/PA4251/PA4256/PA4260/PA4262/PA4265/PA4266/PA4268/PA4274/PA4560/PA4568/PA4741/PA4744	26	PA2056
GO:0043107	type IV pilus-dependent motility	0.000219	0.007611	0.006906	PA3805/PA4525/PA4550/PA4551/PA4555/PA4999/PA5042/PA5261	8	PA2056
GO:0009297	pilus assembly	0.000353	0.01023	0.009283	PA3805/PA4084/PA4528/PA4550/PA4551/PA4999	6	PA2056
GO:0044096	type IV pilus	0.000565	0.014047	0.012747	PA3115/PA4525/PA4550/PA4551/PA5042	5	PA2056
GO:0003677	DNA binding	0.000657	0.01429	0.012967	PA0001/PA0376/PA0472/PA0576/PA0652/PA1347/PA1430/PA1455/PA1544/PA1804/PA1937/PA2016/PA2586/PA2591/PA2732/PA2735/PA2737/PA3006/PA3011/PA3133/PA3140/PA3168/PA3477/PA4238/PA4269/PA4270/PA4296/PA4674/PA4931/PA5125/PA5261/PA5301/PA5348/PA5374	34	PA2056
GO:0005525	GTP binding	0.001024	0.018971	0.017215	PA4265/PA4266/PA4277/PA4566/PA4744/PA4943/PA5567	7	PA2056
GO:0003924	GTPase activity	0.00109	0.018971	0.017215	PA4265/PA4266/PA4277/PA4566/PA4744/PA5567	6	PA2056
GO:0043683	type IV pilus biogenesis	0.001398	0.022114	0.020068	PA3805/PA4528/PA4550/PA4551/PA5042	5	PA2056
GO:0044255	cellular lipid metabolic process	0.001702	0.024684	0.022399	PA2965/PA2969/PA3014/PA3299/PA3639/PA3645/PA4693/PA4847	8	PA2056
GO:0007155	cell adhesion	0.00205	0.027435	0.024896	PA0497/PA0498/PA1094/PA4525/PA5284	5	PA2056
GO:0003723	RNA binding	0.003712	0.043109	0.039119	PA2619/PA2975/PA3162/PA4260/PA4544/PA4568/PA4741/PA4745/PA4934/PA4937/PA5239	11	PA2056
GO:0009289	pilus	0.003716	0.043109	0.039119	PA0497/PA0498/PA4525/PA5284	4	PA2056
GO:0044267	cellular protein metabolic process	2.36e-15	2.79e-13	2.24e-13	PA0008/PA2620/PA2740/PA2743/PA2970/PA3049/PA3162/PA4237/PA4240/PA4242/PA4245/PA4247/PA4249/PA4251/PA4252/PA4255/PA4256/PA4258/PA4261/PA4263/PA4265/PA4266/PA4268/PA4274/PA4744	25	PA2096
GO:0006412	translation	1.58e-14	9.35e-13	7.5e-13	PA2970/PA3162/PA4237/PA4240/PA4242/PA4245/PA4247/PA4249/PA4251/PA4252/PA4255/PA4256/PA4258/PA4261/PA4263/PA4265/PA4266/PA4268/PA4274	19	PA2096
GO:0003735	structural constituent of ribosome	2.71e-13	1.07e-11	8.57e-12	PA2970/PA3162/PA4237/PA4240/PA4242/PA4245/PA4247/PA4249/PA4251/PA4252/PA4255/PA4256/PA4258/PA4261/PA4263/PA4268/PA4274	17	PA2096
GO:0005840	ribosome	8.87e-12	2.62e-10	2.1e-10	PA3162/PA4237/PA4240/PA4242/PA4247/PA4249/PA4251/PA4252/PA4255/PA4256/PA4258/PA4261/PA4263/PA4268/PA4274	15	PA2096
GO:0043107	type IV pilus-dependent motility	0.000938	0.022127	0.017765	PA1803/PA3385/PA5042/PA5043/PA5261	5	PA2096
GO:0003924	GTPase activity	0.002076	0.040822	0.032774	PA4265/PA4266/PA4407/PA4744	4	PA2096
GO:0006412	translation	4.49e-10	8.16e-08	7.46e-08	PA3162/PA3601/PA3656/PA4239/PA4244/PA4248/PA4250/PA4259/PA4263/PA4265/PA4266/PA4267/PA4272/PA4274/PA4277/PA4433/PA4568/PA4752/PA4935/PA5049/PA5315	21	PA2115
GO:0003735	structural constituent of ribosome	4.89e-07	4.45e-05	4.07e-05	PA3162/PA3601/PA3656/PA4239/PA4244/PA4248/PA4250/PA4259/PA4263/PA4267/PA4274/PA4433/PA4568/PA4935/PA5049/PA5315	16	PA2115
GO:0005840	ribosome	1.82e-05	0.001102	0.001007	PA3162/PA3601/PA3656/PA4248/PA4250/PA4259/PA4263/PA4274/PA4433/PA4568/PA4935/PA5049/PA5315	13	PA2115
GO:0009243	O antigen biosynthetic process	8.68e-05	0.003951	0.003611	PA0938/PA3141/PA3151/PA3152/PA3153/PA3154/PA3155/PA3159/PA5161/PA5454	10	PA2115
GO:0000976	transcription regulatory region sequence-specific DNA binding	0.000185	0.006751	0.006169	PA0424/PA1003/PA1544/PA1713/PA1898/PA2127/PA2667/PA3006/PA4296/PA4764	10	PA2115
GO:0044267	cellular protein metabolic process	0.000232	0.007033	0.006427	PA2620/PA2740/PA3049/PA3162/PA3656/PA4138/PA4239/PA4244/PA4248/PA4250/PA4259/PA4263/PA4265/PA4266/PA4267/PA4272/PA4274/PA4568/PA5489	19	PA2115
GO:0003723	RNA binding	0.000936	0.024336	0.022239	PA2975/PA3162/PA4138/PA4239/PA4568/PA4727/PA4740/PA4745/PA4935/PA4937/PA5118/PA5239	12	PA2115
GO:1902600	proton transmembrane transport	0.001269	0.028874	0.026386	PA3153/PA5021/PA5554/PA5556/PA5559	5	PA2115
GO:0005840	ribosome	6.97e-06	0.000516	0.000468	PA3162/PA3656/PA3742/PA4249/PA4251/PA4264/PA4268/PA4433/PA4568	9	PA2196
GO:0006412	translation	8.32e-06	0.000516	0.000468	PA3162/PA3656/PA3742/PA4249/PA4251/PA4264/PA4268/PA4277/PA4433/PA4568	10	PA2196
GO:0003735	structural constituent of ribosome	1.87e-05	0.000772	0.000702	PA3162/PA3656/PA3742/PA4249/PA4251/PA4264/PA4268/PA4433/PA4568	9	PA2196
GO:0044267	cellular protein metabolic process	0.001224	0.037941	0.034463	PA2743/PA3162/PA3656/PA3742/PA4138/PA4249/PA4251/PA4264/PA4268/PA4568	10	PA2196
GO:0003723	RNA binding	0.00168	0.041662	0.037843	PA0715/PA2975/PA3162/PA4138/PA4568/PA4727/PA4944	7	PA2196
GO:0009405	pathogenesis	0.002138	0.044186	0.040135	PA0652/PA0844/PA1249/PA1430/PA3385/PA4944	6	PA2196
GO:0009243	O antigen biosynthetic process	3.65e-05	0.004669	0.004608	PA3146/PA3151/PA3152/PA3154/PA3155/PA3156/PA3159/PA3160	8	PA2246
GO:0006412	translation	5.3e-08	8.96e-06	8.43e-06	PA3162/PA4240/PA4244/PA4248/PA4250/PA4256/PA4258/PA4265/PA4267/PA4272/PA4273/PA4277/PA4432/PA4563/PA4568/PA4741/PA4752/PA4934	18	PA2270
GO:0003723	RNA binding	1.37e-06	0.000116	0.000109	PA0715/PA2619/PA2975/PA3162/PA3817/PA4138/PA4273/PA4563/PA4568/PA4727/PA4741/PA4934/PA4937/PA4944/PA5118/PA5239	16	PA2270
GO:0003735	structural constituent of ribosome	7.63e-06	0.00043	0.000404	PA3162/PA4240/PA4244/PA4248/PA4250/PA4256/PA4258/PA4267/PA4273/PA4432/PA4563/PA4568/PA4741/PA4934	14	PA2270
GO:0000976	transcription regulatory region sequence-specific DNA binding	0.000117	0.004937	0.004643	PA0424/PA1003/PA1097/PA1544/PA1713/PA1754/PA1898/PA2127/PA3006/PA4764	10	PA2270
GO:0005840	ribosome	0.00025	0.008464	0.00796	PA3162/PA4240/PA4248/PA4250/PA4256/PA4258/PA4432/PA4563/PA4568/PA4741/PA4934	11	PA2270
GO:0044267	cellular protein metabolic process	0.000977	0.027506	0.02587	PA2619/PA2620/PA2743/PA3162/PA4138/PA4240/PA4244/PA4248/PA4250/PA4256/PA4258/PA4265/PA4267/PA4272/PA4273/PA4568/PA4741	17	PA2270
GO:0006412	translation	2.44e-10	3.64e-08	3.27e-08	PA3653/PA3656/PA4237/PA4240/PA4248/PA4251/PA4256/PA4258/PA4260/PA4262/PA4265/PA4266/PA4267/PA4268/PA4271/PA4274/PA4277/PA4432/PA4433	19	PA2276
GO:0003735	structural constituent of ribosome	9.35e-08	6.67e-06	5.99e-06	PA3656/PA4237/PA4240/PA4248/PA4251/PA4256/PA4258/PA4260/PA4262/PA4267/PA4268/PA4271/PA4274/PA4432/PA4433	15	PA2276
GO:0005840	ribosome	1.34e-07	6.67e-06	5.99e-06	PA3656/PA4237/PA4240/PA4248/PA4251/PA4256/PA4258/PA4260/PA4262/PA4268/PA4271/PA4274/PA4432/PA4433	14	PA2276
GO:0044096	type IV pilus	3.17e-07	1.01e-05	9.09e-06	PA3115/PA4525/PA4550/PA4551/PA5041/PA5043/PA5044	7	PA2276
GO:0044267	cellular protein metabolic process	3.4e-07	1.01e-05	9.09e-06	PA0008/PA2619/PA2620/PA2740/PA3653/PA3656/PA4237/PA4240/PA4248/PA4251/PA4256/PA4258/PA4260/PA4262/PA4265/PA4266/PA4267/PA4268/PA4271/PA4274/PA4744	21	PA2276
GO:0043683	type IV pilus biogenesis	2.76e-05	0.000623	0.000559	PA4528/PA4550/PA4551/PA5041/PA5043/PA5044	6	PA2276
GO:0043107	type IV pilus-dependent motility	2.93e-05	0.000623	0.000559	PA1803/PA4525/PA4550/PA4551/PA5041/PA5043/PA5044/PA5261	8	PA2276
GO:0005525	GTP binding	0.000182	0.003392	0.003044	PA4265/PA4266/PA4277/PA4566/PA4744/PA4943/PA5567	7	PA2276
GO:0003924	GTPase activity	0.000238	0.003943	0.003537	PA4265/PA4266/PA4277/PA4566/PA4744/PA5567	6	PA2276
GO:0003735	structural constituent of ribosome	0.00031	0.02512	0.021872	PA3601/PA4249/PA4257/PA4258/PA4263/PA5315	6	PA2281
GO:0006412	translation	0.000652	0.026424	0.023007	PA3601/PA4249/PA4257/PA4258/PA4263/PA5315	6	PA2281
GO:0005840	ribosome	0.001379	0.037228	0.032414	PA3601/PA4249/PA4258/PA4263/PA5315	5	PA2281
GO:0009243	O antigen biosynthetic process	0.000147	0.007782	0.007419	PA3152/PA3153/PA3154/PA3160	4	PA2312
GO:0006412	translation	5.66e-05	0.009509	0.009116	PA3162/PA3656/PA3742/PA3745/PA4241/PA4249/PA4267/PA4268/PA4277/PA4433/PA4563/PA4568/PA4741/PA4752	14	PA2488
GO:0003735	structural constituent of ribosome	0.000233	0.013665	0.0131	PA3162/PA3656/PA3742/PA3745/PA4241/PA4249/PA4267/PA4268/PA4433/PA4563/PA4568/PA4741	12	PA2488
GO:1900233	positive regulation of single-species biofilm formation on inanimate substrate	0.000262	0.013665	0.0131	PA2586/PA3385/PA3622/PA4296/PA4843	5	PA2488
GO:0005840	ribosome	0.000325	0.013665	0.0131	PA3162/PA3656/PA3742/PA3745/PA4241/PA4249/PA4268/PA4433/PA4563/PA4568/PA4741	11	PA2488
GO:0044267	cellular protein metabolic process	2.09e-05	0.001673	0.001479	PA0008/PA0009/PA2619/PA2620/PA2740/PA2743/PA2970/PA3162/PA4138/PA4237/PA4240/PA4248/PA4254/PA4257/PA4265/PA4267/PA4567	17	PA2523
GO:0007155	cell adhesion	2.49e-05	0.001673	0.001479	PA0497/PA0498/PA1094/PA2128/PA4086/PA4525	6	PA2523
GO:0006412	translation	3.35e-05	0.001673	0.001479	PA2970/PA3162/PA4237/PA4240/PA4248/PA4254/PA4257/PA4265/PA4267/PA4277/PA4432/PA4567	12	PA2523
GO:0009289	pilus	5.06e-05	0.001898	0.001679	PA0497/PA0498/PA2128/PA4086/PA4525	5	PA2523
GO:0003735	structural constituent of ribosome	0.000231	0.006927	0.006125	PA2970/PA3162/PA4237/PA4240/PA4248/PA4254/PA4257/PA4267/PA4432/PA4567	10	PA2523
GO:0003677	DNA binding	0.000471	0.011769	0.010406	PA0001/PA0002/PA0576/PA0979/PA1347/PA1368/PA1430/PA1544/PA1804/PA1937/PA2586/PA2591/PA2732/PA2735/PA3006/PA3011/PA3133/PA3477/PA3622/PA4080/PA4269/PA4296/PA4462/PA5261/PA5301/PA5348	26	PA2523
GO:0042121	alginic acid biosynthetic process	8.98e-08	9.97e-06	9.36e-06	PA3540/PA3541/PA3544/PA3546/PA3548/PA3549/PA3550	7	PA2547
GO:0050896	response to stimulus	1.09e-05	0.000605	0.000568	PA2400/PA3531/PA3540/PA3541/PA3544/PA3546/PA3548/PA3549/PA3550/PA3866/PA4613	11	PA2547
GO:0006412	translation	2.93e-06	0.000598	0.000549	PA3162/PA3653/PA3656/PA3742/PA3745/PA4240/PA4248/PA4259/PA4262/PA4265/PA4266/PA4268/PA4271/PA4274/PA4277/PA4432/PA4563/PA4568/PA4741/PA4752/PA4935/PA5315	22	PA2551
GO:0005840	ribosome	4.4e-05	0.004487	0.004121	PA3162/PA3656/PA3742/PA3745/PA4240/PA4248/PA4259/PA4262/PA4268/PA4271/PA4274/PA4432/PA4563/PA4568/PA4741/PA4935/PA5315	17	PA2551
GO:0044267	cellular protein metabolic process	7.65e-05	0.005204	0.00478	PA0009/PA0903/PA0956/PA2619/PA2620/PA2740/PA3161/PA3162/PA3482/PA3635/PA3653/PA3656/PA3700/PA3742/PA3745/PA4138/PA4240/PA4248/PA4259/PA4262/PA4265/PA4266/PA4268/PA4271/PA4274/PA4568/PA4741/PA4744/PA5489	29	PA2551
GO:0003735	structural constituent of ribosome	0.000225	0.011482	0.010546	PA3162/PA3656/PA3742/PA3745/PA4240/PA4248/PA4259/PA4262/PA4268/PA4271/PA4274/PA4432/PA4563/PA4568/PA4741/PA4935/PA5315	17	PA2551
GO:0043107	type IV pilus-dependent motility	0.000463	0.018879	0.01734	PA0396/PA1803/PA3805/PA4550/PA4554/PA4556/PA4761/PA5041/PA5044/PA5261	10	PA2551
GO:0044267	cellular protein metabolic process	0.000204	0.009355	0.008338	PA2620/PA2741/PA2743/PA3049/PA3162/PA3742/PA4138/PA4241/PA4249/PA4268/PA4568	11	PA2577
GO:0003723	RNA binding	0.000229	0.009355	0.008338	PA0715/PA0905/PA2975/PA3162/PA4138/PA4241/PA4568/PA4944	8	PA2577
GO:0006412	translation	0.000256	0.009355	0.008338	PA2741/PA3162/PA3742/PA4241/PA4249/PA4268/PA4277/PA4568	8	PA2577
GO:0005840	ribosome	0.000302	0.009355	0.008338	PA2741/PA3162/PA3742/PA4241/PA4249/PA4268/PA4568	7	PA2577
GO:0003735	structural constituent of ribosome	0.000623	0.015461	0.013781	PA2741/PA3162/PA3742/PA4241/PA4249/PA4268/PA4568	7	PA2577
GO:0005615	extracellular space	0.000934	0.019298	0.017201	PA0844/PA0888/PA1249/PA4175	4	PA2577
GO:0002047	phenazine biosynthetic process	0.001458	0.025832	0.023025	PA0051/PA1899/PA4209/PA4211	4	PA2577
GO:0000976	transcription regulatory region sequence-specific DNA binding	0.003316	0.049449	0.044076	PA1097/PA1713/PA1898/PA4296/PA4764	5	PA2577
GO:0009372	quorum sensing	0.003589	0.049449	0.044076	PA0905/PA1898/PA4944	3	PA2577
GO:0005840	ribosome	0.000528	0.041935	0.040386	PA2741/PA3162/PA3656/PA3742/PA4241/PA4249/PA4274/PA4433	8	PA2601
GO:0006412	translation	0.00066	0.041935	0.040386	PA2741/PA3162/PA3656/PA3742/PA4241/PA4249/PA4274/PA4277/PA4433	9	PA2601
GO:0003735	structural constituent of ribosome	0.001168	0.041935	0.040386	PA2741/PA3162/PA3656/PA3742/PA4241/PA4249/PA4274/PA4433	8	PA2601
GO:0050896	response to stimulus	0.00119	0.041935	0.040386	PA2570/PA3477/PA3531/PA3540/PA3541/PA3543/PA3548/PA3818/PA3866/PA4613	10	PA2601
GO:0033104	type VI protein secretion system complex	0.008205	0.024614	0.008637	PA2685	1	PA2686
GO:0033103	protein secretion by the type VI secretion system	0.025215	0.037823	0.013271	PA2685	1	PA2686
GO:0006412	translation	8.03e-11	1.54e-08	1.47e-08	PA0579/PA3162/PA3653/PA3656/PA3742/PA3745/PA4241/PA4245/PA4249/PA4251/PA4253/PA4257/PA4262/PA4265/PA4266/PA4267/PA4274/PA4277/PA4432/PA4433/PA4568/PA4671/PA4752/PA5316	24	PA2692
GO:0003735	structural constituent of ribosome	5.24e-08	5.03e-06	4.8e-06	PA0579/PA3162/PA3656/PA3742/PA3745/PA4241/PA4245/PA4249/PA4251/PA4253/PA4257/PA4262/PA4267/PA4274/PA4432/PA4433/PA4568/PA4671/PA5316	19	PA2692
GO:0005840	ribosome	1.46e-06	9.35e-05	8.92e-05	PA0579/PA3162/PA3656/PA3742/PA3745/PA4241/PA4249/PA4251/PA4253/PA4262/PA4274/PA4432/PA4433/PA4568/PA4671/PA5316	16	PA2692
GO:0044267	cellular protein metabolic process	1.99e-05	0.000956	0.000912	PA0009/PA0019/PA2620/PA2740/PA2743/PA3162/PA3653/PA3656/PA3742/PA3745/PA4138/PA4241/PA4245/PA4249/PA4251/PA4253/PA4257/PA4262/PA4265/PA4266/PA4267/PA4274/PA4568/PA5489	24	PA2692
GO:0055085	transmembrane transport	9.73e-07	0.000205	0.000204	PA0030/PA0129/PA0157/PA0204/PA0220/PA0241/PA0246/PA0313/PA0334/PA0352/PA0438/PA0458/PA0476/PA0694/PA0703/PA0783/PA0811/PA1147/PA1212/PA1232/PA1236/PA1238/PA1248/PA1257/PA1258/PA1418/PA1436/PA1496/PA1848/PA2059/PA2060/PA2092/PA2187/PA2351/PA2391/PA2520/PA2521/PA2526/PA2527/PA2678/PA2836/PA2837/PA2933/PA3313/PA3316/PA3382/PA3383/PA3404/PA3408/PA3443/PA3468/PA3492/PA3512/PA3521/PA3522/PA3595/PA3597/…	94	PA2718
GO:0015562	efflux transmembrane transporter activity	6.33e-05	0.00583	0.005788	PA1238/PA1248/PA2390/PA2391/PA2837/PA3404/PA3521/PA3522/PA4144/PA4208/PA4592/PA4597/PA4598	13	PA2718
GO:0022857	transmembrane transporter activity	8.29e-05	0.00583	0.005788	PA0030/PA0157/PA0220/PA0241/PA0246/PA0313/PA0334/PA0352/PA0438/PA0458/PA0476/PA0694/PA0703/PA0783/PA0786/PA0811/PA1147/PA1212/PA1232/PA1236/PA1238/PA1257/PA1258/PA1418/PA1436/PA1848/PA2057/PA2092/PA2391/PA2520/PA2521/PA2526/PA2527/PA2837/PA2933/PA3408/PA3521/PA3522/PA3595/PA3676/PA3709/PA3749/PA3892/PA3893/PA4072/PA4113/PA4144/PA4187/PA4193/PA4208/PA4343/PA4374/PA4597/PA4598/PA4707/PA4804/PA4860/…	61	PA2718
GO:0016829	lyase activity	0.000226	0.011928	0.011841	PA0223/PA0792/PA0854/PA1254/PA3131/PA3181/PA3377/PA3547/PA4188/PA5413	10	PA2718
GO:0006412	translation	1.26e-05	0.002221	0.002112	PA2741/PA3162/PA3653/PA3656/PA3742/PA3745/PA4241/PA4249/PA4263/PA4268/PA4277/PA4433/PA4568/PA4752/PA5316	15	PA2766
GO:0005840	ribosome	7.06e-05	0.006216	0.005912	PA2741/PA3162/PA3656/PA3742/PA3745/PA4241/PA4249/PA4263/PA4268/PA4433/PA4568/PA5316	12	PA2766
GO:0003735	structural constituent of ribosome	0.000233	0.013641	0.012972	PA2741/PA3162/PA3656/PA3742/PA3745/PA4241/PA4249/PA4263/PA4268/PA4433/PA4568/PA5316	12	PA2766
GO:0006412	translation	3.38e-09	6.01e-07	5.65e-07	PA3162/PA3656/PA3742/PA4237/PA4241/PA4245/PA4248/PA4250/PA4254/PA4256/PA4260/PA4263/PA4265/PA4267/PA4268/PA4271/PA4277/PA4433/PA4568/PA4741/PA4752	21	PA2917
GO:0044267	cellular protein metabolic process	1.5e-08	1.33e-06	1.25e-06	PA0009/PA2620/PA2740/PA2743/PA3049/PA3161/PA3162/PA3635/PA3656/PA3700/PA3742/PA3824/PA4138/PA4237/PA4241/PA4245/PA4248/PA4250/PA4254/PA4256/PA4260/PA4263/PA4265/PA4267/PA4268/PA4271/PA4568/PA4741	28	PA2917
GO:0003735	structural constituent of ribosome	6.44e-08	3.82e-06	3.59e-06	PA3162/PA3656/PA3742/PA4237/PA4241/PA4245/PA4248/PA4250/PA4254/PA4256/PA4260/PA4263/PA4267/PA4268/PA4271/PA4433/PA4568/PA4741	18	PA2917
GO:0005840	ribosome	3.69e-07	1.64e-05	1.54e-05	PA3162/PA3656/PA3742/PA4237/PA4241/PA4248/PA4250/PA4254/PA4256/PA4260/PA4263/PA4268/PA4271/PA4433/PA4568/PA4741	16	PA2917
GO:0003723	RNA binding	0.000201	0.007165	0.006737	PA2582/PA2975/PA3162/PA3817/PA4138/PA4241/PA4260/PA4568/PA4727/PA4741/PA4745/PA4937/PA5118/PA5239	14	PA2917
GO:0005615	extracellular space	0.001228	0.036439	0.034263	PA0844/PA0888/PA1249/PA1342/PA4031/PA4175	6	PA2917
GO:0006412	translation	3.35e-08	2.48e-06	2.36e-06	PA4241/PA4244/PA4246/PA4247/PA4249/PA4255/PA4258/PA4259/PA4277	9	PA2930
GO:0003735	structural constituent of ribosome	1.83e-07	6.75e-06	6.44e-06	PA4241/PA4244/PA4246/PA4247/PA4249/PA4255/PA4258/PA4259	8	PA2930
GO:0044267	cellular protein metabolic process	5.61e-07	1.38e-05	1.32e-05	PA0019/PA2740/PA4241/PA4244/PA4246/PA4247/PA4249/PA4255/PA4258/PA4259	10	PA2930
GO:0005840	ribosome	1.31e-06	2.43e-05	2.31e-05	PA4241/PA4246/PA4247/PA4249/PA4255/PA4258/PA4259	7	PA2930
GO:0006412	translation	5.92e-10	7.17e-08	6.48e-08	PA2741/PA3162/PA4237/PA4240/PA4242/PA4248/PA4260/PA4263/PA4265/PA4267/PA4271/PA4274/PA4277/PA4433/PA4567	15	PA2957
GO:0003735	structural constituent of ribosome	9.86e-09	4.28e-07	3.87e-07	PA2741/PA3162/PA4237/PA4240/PA4242/PA4248/PA4260/PA4263/PA4267/PA4271/PA4274/PA4433/PA4567	13	PA2957
GO:0044267	cellular protein metabolic process	1.06e-08	4.28e-07	3.87e-07	PA0008/PA0668/PA2620/PA2738/PA2741/PA3162/PA4237/PA4240/PA4242/PA4248/PA4260/PA4263/PA4265/PA4267/PA4271/PA4274/PA4567/PA4744	18	PA2957
GO:0005840	ribosome	2.45e-08	7.42e-07	6.71e-07	PA2741/PA3162/PA4237/PA4240/PA4242/PA4248/PA4260/PA4263/PA4271/PA4274/PA4433/PA4567	12	PA2957
GO:0003677	DNA binding	4.02e-05	0.000972	0.000879	PA0001/PA0002/PA0004/PA0472/PA0576/PA0966/PA1430/PA1544/PA2299/PA2586/PA2732/PA2735/PA2738/PA3006/PA3168/PA3477/PA4238/PA4270/PA4462/PA5261/PA5301/PA5348	22	PA2957
GO:0005525	GTP binding	0.000826	0.016663	0.015076	PA4265/PA4277/PA4744/PA4943/PA5567	5	PA2957
GO:0003924	GTPase activity	0.002199	0.038007	0.034386	PA4265/PA4277/PA4744/PA5567	4	PA2957
GO:0006412	translation	8.81e-08	1.52e-05	1.43e-05	PA2741/PA3162/PA3742/PA4241/PA4248/PA4250/PA4254/PA4257/PA4258/PA4260/PA4263/PA4265/PA4266/PA4267/PA4277/PA4433/PA4752	17	PA3027
GO:0003735	structural constituent of ribosome	1.51e-05	0.001298	0.001223	PA2741/PA3162/PA3742/PA4241/PA4248/PA4250/PA4254/PA4257/PA4258/PA4260/PA4263/PA4267/PA4433	13	PA3027
GO:0044267	cellular protein metabolic process	3.36e-05	0.001927	0.001816	PA2620/PA2741/PA2743/PA3162/PA3700/PA3742/PA3987/PA4138/PA4241/PA4248/PA4250/PA4254/PA4257/PA4258/PA4260/PA4263/PA4265/PA4266/PA4267	19	PA3027
GO:0005840	ribosome	0.000115	0.004952	0.004667	PA2741/PA3162/PA3742/PA4241/PA4248/PA4250/PA4254/PA4258/PA4260/PA4263/PA4433	11	PA3027
GO:0000976	transcription regulatory region sequence-specific DNA binding	0.000317	0.0109	0.010273	PA0424/PA1003/PA1097/PA1544/PA1898/PA2127/PA2931/PA3006/PA4764	9	PA3027
GO:0003723	RNA binding	0.000998	0.028624	0.026977	PA2975/PA3048/PA3162/PA3817/PA4138/PA4241/PA4257/PA4260/PA4727/PA4937/PA5239	11	PA3027
GO:0005840	ribosome	3.34e-05	0.000261	0.000125	PA4259/PA4261/PA4268	3	PA3045
GO:0003735	structural constituent of ribosome	4.74e-05	0.000261	0.000125	PA4259/PA4261/PA4268	3	PA3045
GO:0006412	translation	7.14e-05	0.000262	0.000125	PA4259/PA4261/PA4268	3	PA3045
GO:0044267	cellular protein metabolic process	0.000409	0.001125	0.000538	PA4259/PA4261/PA4268	3	PA3045
GO:0009055	electron transfer activity	0.003496	0.007691	0.00368	PA0518/PA4922	2	PA3045
GO:0005507	copper ion binding	0.017824	0.032676	0.015635	PA4922	1	PA3045
GO:0006412	translation	5.05e-10	9.18e-08	8.5e-08	PA2741/PA3162/PA3656/PA3742/PA4237/PA4241/PA4244/PA4247/PA4251/PA4253/PA4259/PA4263/PA4265/PA4266/PA4267/PA4274/PA4277/PA4432/PA4563/PA4568/PA4741/PA4752	22	PA3094
GO:0003735	structural constituent of ribosome	6.44e-08	5.86e-06	5.42e-06	PA2741/PA3162/PA3656/PA3742/PA4237/PA4241/PA4244/PA4247/PA4251/PA4253/PA4259/PA4263/PA4267/PA4274/PA4432/PA4563/PA4568/PA4741	18	PA3094
GO:0005840	ribosome	3.69e-07	2.24e-05	2.07e-05	PA2741/PA3162/PA3656/PA3742/PA4237/PA4241/PA4247/PA4251/PA4253/PA4259/PA4263/PA4274/PA4432/PA4563/PA4568/PA4741	16	PA3094
GO:0044267	cellular protein metabolic process	1.18e-05	0.000538	0.000497	PA0009/PA2620/PA2741/PA3161/PA3162/PA3482/PA3656/PA3742/PA4138/PA4237/PA4241/PA4244/PA4247/PA4251/PA4253/PA4259/PA4263/PA4265/PA4266/PA4267/PA4274/PA4568/PA4741	23	PA3094
GO:0009289	pilus	0.00074	0.038134	0.037413	PA0497/PA0498/PA4525	3	PA3124
GO:1900233	positive regulation of single-species biofilm formation on inanimate substrate	0.00074	0.038134	0.037413	PA3385/PA3622/PA4197	3	PA3124
GO:0006412	translation	1.78e-06	0.000333	0.000311	PA3162/PA3742/PA4240/PA4244/PA4248/PA4250/PA4256/PA4260/PA4263/PA4265/PA4266/PA4267/PA4271/PA4274/PA4277/PA4433/PA4752	17	PA3174
GO:0009243	O antigen biosynthetic process	3.99e-06	0.000373	0.000349	PA0938/PA3141/PA3148/PA3149/PA3151/PA3152/PA3155/PA3159/PA3160/PA5161/PA5454/PA5456	12	PA3174
GO:0044267	cellular protein metabolic process	6.26e-05	0.003902	0.003647	PA2619/PA2620/PA2740/PA2743/PA3162/PA3742/PA4240/PA4244/PA4248/PA4250/PA4256/PA4260/PA4263/PA4265/PA4266/PA4267/PA4271/PA4274/PA4559/PA4672/PA5489	21	PA3174
GO:0003735	structural constituent of ribosome	0.000135	0.006334	0.005919	PA3162/PA3742/PA4240/PA4244/PA4248/PA4250/PA4256/PA4260/PA4263/PA4267/PA4271/PA4274/PA4433	13	PA3174
GO:0000976	transcription regulatory region sequence-specific DNA binding	0.000319	0.01193	0.011147	PA0424/PA1003/PA1097/PA1713/PA1898/PA2127/PA2667/PA3006/PA4296/PA4764	10	PA3174
GO:0005840	ribosome	0.000713	0.022232	0.020774	PA3162/PA3742/PA4240/PA4248/PA4250/PA4256/PA4260/PA4263/PA4271/PA4274/PA4433	11	PA3174
GO:0006412	translation	3.65e-08	7.41e-06	7.03e-06	PA0579/PA3162/PA3601/PA3653/PA3656/PA3742/PA3745/PA4237/PA4241/PA4248/PA4251/PA4256/PA4257/PA4258/PA4263/PA4265/PA4267/PA4274/PA4277/PA4433/PA4563/PA4568/PA4752/PA5315	24	PA3215
GO:0003735	structural constituent of ribosome	1.24e-06	0.000125	0.000119	PA0579/PA3162/PA3601/PA3656/PA3742/PA3745/PA4237/PA4241/PA4248/PA4251/PA4256/PA4257/PA4258/PA4263/PA4267/PA4274/PA4433/PA4563/PA4568/PA5315	20	PA3215
GO:0005840	ribosome	3.59e-06	0.000243	0.000231	PA0579/PA3162/PA3601/PA3656/PA3742/PA3745/PA4237/PA4241/PA4248/PA4251/PA4256/PA4258/PA4263/PA4274/PA4433/PA4563/PA4568/PA5315	18	PA3215
GO:0044267	cellular protein metabolic process	0.000137	0.006959	0.006603	PA0009/PA0019/PA0903/PA2619/PA2620/PA2740/PA3162/PA3482/PA3653/PA3656/PA3742/PA3745/PA3824/PA3831/PA4138/PA4237/PA4241/PA4248/PA4251/PA4256/PA4257/PA4258/PA4263/PA4265/PA4267/PA4274/PA4568	27	PA3215
GO:0005840	ribosome	0.000261	0.020013	0.019177	PA3162/PA3656/PA3745/PA4241/PA4249/PA4264/PA4268/PA4433/PA4568	9	PA3220
GO:0003723	RNA binding	0.000362	0.020013	0.019177	PA2975/PA3162/PA4138/PA4241/PA4568/PA4727/PA4937/PA4944/PA5118/PA5239	10	PA3220
GO:0006412	translation	0.000414	0.020013	0.019177	PA3162/PA3656/PA3745/PA4241/PA4249/PA4264/PA4268/PA4277/PA4433/PA4568	10	PA3220
GO:0003735	structural constituent of ribosome	0.000641	0.023243	0.022272	PA3162/PA3656/PA3745/PA4241/PA4249/PA4264/PA4268/PA4433/PA4568	9	PA3220
GO:0000976	transcription regulatory region sequence-specific DNA binding	0.00126	0.036534	0.035009	PA0424/PA1003/PA1097/PA1544/PA1898/PA2127/PA4764	7	PA3220
GO:0006412	translation	1.92e-06	0.000336	0.000325	PA3162/PA3653/PA3656/PA4240/PA4248/PA4250/PA4251/PA4253/PA4256/PA4258/PA4263/PA4267/PA4277/PA4433/PA4568/PA4752	16	PA3260
GO:0003735	structural constituent of ribosome	4.16e-05	0.003309	0.003204	PA3162/PA3656/PA4240/PA4248/PA4250/PA4251/PA4253/PA4256/PA4258/PA4263/PA4267/PA4433/PA4568	13	PA3260
GO:0005840	ribosome	5.67e-05	0.003309	0.003204	PA3162/PA3656/PA4240/PA4248/PA4250/PA4251/PA4253/PA4256/PA4258/PA4263/PA4433/PA4568	12	PA3260
GO:0044267	cellular protein metabolic process	0.001063	0.046509	0.04504	PA0009/PA2620/PA2740/PA3162/PA3653/PA3656/PA4138/PA4240/PA4248/PA4250/PA4251/PA4253/PA4256/PA4258/PA4263/PA4267/PA4568	17	PA3260
GO:0006412	translation	5.52e-08	1.17e-05	1.13e-05	PA0579/PA3162/PA3653/PA3656/PA3742/PA3745/PA4237/PA4241/PA4244/PA4248/PA4251/PA4254/PA4257/PA4258/PA4262/PA4264/PA4267/PA4268/PA4272/PA4273/PA4277/PA4433/PA4568/PA4671/PA4741/PA4752/PA4932/PA5315	28	PA3420
GO:0003735	structural constituent of ribosome	7.61e-07	8.07e-05	7.81e-05	PA0579/PA3162/PA3656/PA3742/PA3745/PA4237/PA4241/PA4244/PA4248/PA4251/PA4254/PA4257/PA4258/PA4262/PA4264/PA4267/PA4268/PA4273/PA4433/PA4568/PA4671/PA4741/PA4932/PA5315	24	PA3420
GO:0044267	cellular protein metabolic process	1.28e-05	0.000903	0.000874	PA0008/PA0009/PA0019/PA1670/PA1996/PA2620/PA2740/PA2743/PA3162/PA3653/PA3656/PA3724/PA3742/PA3745/PA3824/PA4138/PA4237/PA4241/PA4244/PA4248/PA4251/PA4254/PA4257/PA4258/PA4262/PA4264/PA4267/PA4268/PA4272/PA4273/PA4559/PA4560/PA4568/PA4741/PA4744/PA5489	36	PA3420
GO:0005840	ribosome	2.17e-05	0.001152	0.001115	PA0579/PA3162/PA3656/PA3742/PA3745/PA4237/PA4241/PA4248/PA4251/PA4254/PA4258/PA4262/PA4264/PA4268/PA4433/PA4568/PA4671/PA4741/PA4932/PA5315	20	PA3420
GO:0003723	RNA binding	0.000327	0.013871	0.01343	PA0017/PA0733/PA2975/PA3048/PA3162/PA3817/PA4138/PA4241/PA4257/PA4273/PA4544/PA4565/PA4568/PA4727/PA4741/PA4807/PA4932/PA4937/PA4944/PA5118/PA5239	21	PA3420
GO:0006633	fatty acid biosynthetic process	9.17e-05	0.018816	0.017482	PA0493/PA0998/PA0999/PA1373/PA1610/PA2965/PA2968/PA2969/PA3013/PA3014/PA3286/PA3639/PA4353	13	PA3433
GO:0044267	cellular protein metabolic process	0.000177	0.018816	0.017482	PA0009/PA0903/PA0956/PA2612/PA2619/PA2620/PA2739/PA2741/PA3114/PA3162/PA3624/PA3653/PA3655/PA3656/PA3742/PA3802/PA3824/PA4138/PA4237/PA4239/PA4244/PA4248/PA4259/PA4263/PA4265/PA4266/PA4268/PA4271/PA4272/PA4274/PA4439/PA4559/PA4567/PA4678/PA4742/PA4744/PA5197	37	PA3433
GO:0006412	translation	2.97e-08	4.93e-06	4.78e-06	PA2741/PA3162/PA3653/PA3656/PA3742/PA4237/PA4241/PA4249/PA4253/PA4263/PA4265/PA4267/PA4268/PA4274/PA4277/PA4432/PA4568	17	PA3508
GO:0044267	cellular protein metabolic process	7.34e-07	6.09e-05	5.91e-05	PA0009/PA0019/PA2620/PA2741/PA2743/PA3049/PA3162/PA3653/PA3656/PA3742/PA4138/PA4237/PA4241/PA4249/PA4253/PA4263/PA4265/PA4267/PA4268/PA4274/PA4568	21	PA3508
GO:0003735	structural constituent of ribosome	1.13e-06	6.26e-05	6.08e-05	PA2741/PA3162/PA3656/PA3742/PA4237/PA4241/PA4249/PA4253/PA4263/PA4267/PA4268/PA4274/PA4432/PA4568	14	PA3508
GO:0005840	ribosome	1.66e-06	6.9e-05	6.69e-05	PA2741/PA3162/PA3656/PA3742/PA4237/PA4241/PA4249/PA4253/PA4263/PA4268/PA4274/PA4432/PA4568	13	PA3508
GO:0003723	RNA binding	0.000541	0.017951	0.017416	PA2975/PA3162/PA3817/PA4138/PA4241/PA4568/PA4727/PA4937/PA4944/PA5118/PA5239	11	PA3508
GO:0006412	translation	1.74e-09	3.16e-07	2.95e-07	PA0579/PA2741/PA3162/PA3656/PA3742/PA4237/PA4241/PA4245/PA4248/PA4253/PA4255/PA4256/PA4263/PA4265/PA4266/PA4267/PA4271/PA4274/PA4277/PA4433/PA4752	21	PA3565
GO:0003735	structural constituent of ribosome	2.29e-07	2.08e-05	1.94e-05	PA0579/PA2741/PA3162/PA3656/PA3742/PA4237/PA4241/PA4245/PA4248/PA4253/PA4255/PA4256/PA4263/PA4267/PA4271/PA4274/PA4433	17	PA3565
GO:0005840	ribosome	1.38e-06	8.38e-05	7.81e-05	PA0579/PA2741/PA3162/PA3656/PA3742/PA4237/PA4241/PA4248/PA4253/PA4255/PA4256/PA4263/PA4271/PA4274/PA4433	15	PA3565
GO:0044267	cellular protein metabolic process	6.91e-05	0.003144	0.002928	PA0008/PA2620/PA2741/PA3162/PA3656/PA3742/PA3987/PA4138/PA4237/PA4241/PA4245/PA4248/PA4253/PA4255/PA4256/PA4263/PA4265/PA4266/PA4267/PA4271/PA4274	21	PA3565
GO:0016491	oxidoreductase activity	0.001003	0.049166	0.047529	PA0743/PA0863/PA3418/PA3569/PA4124/PA4331/PA4397	7	PA3571
GO:0016987	sigma factor activity	2.71e-06	0.000252	0.000234	PA0149/PA0472/PA0576/PA1300/PA1776/PA1912/PA2426/PA2468/PA3410/PA3899/PA4896	11	PA3699
GO:0034756	regulation of iron ion transport	0.000101	0.006258	0.005808	PA0472/PA1300/PA2468/PA3410/PA3899/PA4896	6	PA3699
GO:0015891	siderophore transport	0.000235	0.010923	0.010138	PA0931/PA1322/PA1912/PA2398/PA3268/PA4156/PA4514/PA5531	8	PA3699
GO:0005829	cytosol	0.00082	0.030517	0.028324	PA0149/PA1300/PA2468/PA3410/PA3899/PA4896	6	PA3699
GO:0006412	translation	6.33e-06	0.000721	0.000654	PA3162/PA3656/PA3742/PA4241/PA4249/PA4253/PA4257/PA4263/PA4268/PA4277/PA4433/PA4568	12	PA3711
GO:0003735	structural constituent of ribosome	9.55e-06	0.000721	0.000654	PA3162/PA3656/PA3742/PA4241/PA4249/PA4253/PA4257/PA4263/PA4268/PA4433/PA4568	11	PA3711
GO:0005840	ribosome	2.05e-05	0.00103	0.000933	PA3162/PA3656/PA3742/PA4241/PA4249/PA4253/PA4263/PA4268/PA4433/PA4568	10	PA3711
GO:0003723	RNA binding	3.16e-05	0.001194	0.001082	PA2975/PA3162/PA3817/PA4138/PA4241/PA4257/PA4568/PA4727/PA4937/PA5118/PA5239	11	PA3711
GO:0000976	transcription regulatory region sequence-specific DNA binding	0.000113	0.0034	0.003081	PA0424/PA1003/PA1544/PA1713/PA1898/PA2667/PA4296/PA4764	8	PA3711
GO:1900233	positive regulation of single-species biofilm formation on inanimate substrate	0.000466	0.01173	0.01063	PA2586/PA3622/PA4296/PA4843	4	PA3711
GO:0044267	cellular protein metabolic process	0.000601	0.01297	0.011754	PA2620/PA2743/PA3162/PA3656/PA3742/PA4138/PA4241/PA4249/PA4253/PA4257/PA4263/PA4268/PA4568	13	PA3711
GO:0003677	DNA binding	0.001366	0.025785	0.023368	PA0001/PA0004/PA0576/PA0652/PA0728/PA0979/PA1154/PA1368/PA1430/PA1544/PA1898/PA2586/PA2591/PA2667/PA3477/PA3622/PA4032/PA4080/PA4269/PA4296/PA4462/PA5337	22	PA3711
GO:0003676	nucleic acid binding	0.002738	0.045934	0.041627	PA0428/PA0455/PA3162/PA3868/PA4241/PA4257/PA4937/PA5239	8	PA3711
GO:1900233	positive regulation of single-species biofilm formation on inanimate substrate	0.000144	0.019539	0.017392	PA2523/PA2586/PA3385/PA3622	4	PA3714
GO:1900377	negative regulation of secondary metabolite biosynthetic process	0.000323	0.021256	0.01892	PA1898/PA2523/PA2667/PA3622	4	PA3714
GO:0003723	RNA binding	0.000469	0.021256	0.01892	PA2975/PA3048/PA3162/PA4138/PA4241/PA4937/PA4944/PA5239	8	PA3714
GO:0000976	transcription regulatory region sequence-specific DNA binding	0.000832	0.028288	0.025179	PA1003/PA1713/PA1898/PA2667/PA3385/PA4764	6	PA3714
GO:0005615	extracellular space	0.001382	0.037583	0.033452	PA0844/PA0888/PA1249/PA4175	4	PA3714
GO:0006412	translation	4.28e-06	0.000466	0.000427	PA3162/PA3745/PA4237/PA4247/PA4248/PA4250/PA4256/PA4257/PA4260/PA4265/PA4268/PA4271	12	PA3830
GO:0003735	structural constituent of ribosome	6.66e-06	0.000466	0.000427	PA3162/PA3745/PA4237/PA4247/PA4248/PA4250/PA4256/PA4257/PA4260/PA4268/PA4271	11	PA3830
GO:0005840	ribosome	1.47e-05	0.000687	0.00063	PA3162/PA3745/PA4237/PA4247/PA4248/PA4250/PA4256/PA4260/PA4268/PA4271	10	PA3830
GO:0044267	cellular protein metabolic process	2.77e-05	0.000971	0.00089	PA2743/PA3161/PA3162/PA3745/PA4237/PA4247/PA4248/PA4250/PA4256/PA4257/PA4260/PA4265/PA4268/PA4271/PA4744	15	PA3830
GO:0009243	O antigen biosynthetic process	0.000341	0.009543	0.008754	PA3145/PA3146/PA3151/PA3152/PA3154/PA3159/PA3160	7	PA3830
GO:0006310	DNA recombination	0.00066	0.015405	0.014131	PA0728/PA3161/PA3263/PA3344/PA3867	5	PA3830
GO:0009276	Gram-negative-bacterium-type cell wall	0.001215	0.024308	0.022297	PA3145/PA3150/PA3154/PA3160/PA3337/PA3540/PA3636/PA3646/PA5276	9	PA3830
GO:0006412	translation	0.000214	0.043866	0.040094	PA0579/PA3162/PA3600/PA3653/PA3656/PA3742/PA3745/PA4240/PA4246/PA4265/PA4266/PA4268/PA4273/PA4277/PA4432/PA4563/PA4752/PA4934/PA5315	19	PA3845
GO:0004129	cytochrome-c oxidase activity	0.009946	0.026832	NA	PA1557	1	PA3932
GO:0071236	cellular response to antibiotic	0.010442	0.026832	NA	PA2621	1	PA3932
GO:0071978	bacterial-type flagellum-dependent swarming motility	0.013416	0.026832	NA	PA2621	1	PA3932
GO:0044010	single-species biofilm formation	0.027233	0.033125	NA	PA2621	1	PA3932
GO:0020037	heme binding	0.031654	0.033125	NA	PA1557	1	PA3932
GO:0006508	proteolysis	0.033125	0.033125	NA	PA2621	1	PA3932
GO:0000976	transcription regulatory region sequence-specific DNA binding	0.000178	0.020595	0.018502	PA0424/PA1003/PA1898/PA2667/PA3385/PA4296	6	PA3973
GO:0003677	DNA binding	4.04e-05	0.003757	0.00319	PA0001/PA0004/PA0376/PA0576/PA1368/PA1430/PA1544/PA1799/PA2586/PA2738/PA3006/PA3140/PA3477/PA5261/PA5348	15	PA4080
GO:0044267	cellular protein metabolic process	0.000111	0.005181	0.004398	PA2620/PA2738/PA2742/PA2743/PA2970/PA3162/PA4248/PA4263/PA4267	9	PA4080
GO:0003735	structural constituent of ribosome	0.00031	0.009614	0.008161	PA2742/PA2970/PA3162/PA4248/PA4263/PA4267	6	PA4080
GO:0006412	translation	0.000652	0.015169	0.012877	PA2742/PA2970/PA3162/PA4248/PA4263/PA4267	6	PA4080
GO:2000147	positive regulation of cell motility	0.001231	0.022896	0.019436	PA0928/PA5261/PA5550	3	PA4080
GO:0000160	phosphorelay signal transduction system	0.003288	0.04585	0.038922	PA0179/PA0928/PA1799/PA2586/PA2798/PA3349/PA5261	7	PA4080
GO:0016070	RNA metabolic process	0.003451	0.04585	0.038922	PA2738/PA2975/PA4275/PA4745	4	PA4080
GO:0042121	alginic acid biosynthetic process	5.78e-05	0.00786	0.007483	PA3540/PA3542/PA3546/PA3548/PA3549/PA3550	6	PA4094
GO:0009276	Gram-negative-bacterium-type cell wall	0.000302	0.020502	0.019518	PA3150/PA3160/PA3540/PA3542/PA3546/PA3548/PA3549/PA3550/PA4020/PA4218/PA4481	11	PA4094
GO:0006412	translation	3.21e-05	0.003889	0.003654	PA2742/PA3162/PA4240/PA4249/PA4250/PA4267/PA4268/PA4277/PA4433	9	PA4132
GO:0003735	structural constituent of ribosome	7.91e-05	0.004787	0.004498	PA2742/PA3162/PA4240/PA4249/PA4250/PA4267/PA4268/PA4433	8	PA4132
GO:0005840	ribosome	0.000254	0.00777	0.0073	PA2742/PA3162/PA4240/PA4249/PA4250/PA4268/PA4433	7	PA4132
GO:0009243	O antigen biosynthetic process	0.000257	0.00777	0.0073	PA3141/PA3146/PA3149/PA3152/PA3155/PA3159	6	PA4132
GO:0006412	translation	3.22e-08	6.19e-06	5.94e-06	PA0579/PA3162/PA3601/PA3653/PA3656/PA3742/PA3745/PA4237/PA4240/PA4248/PA4253/PA4257/PA4259/PA4263/PA4267/PA4271/PA4274/PA4277/PA4432/PA4563/PA4568/PA4752/PA5316	23	PA4145
GO:0003735	structural constituent of ribosome	2.82e-07	2.7e-05	2.59e-05	PA0579/PA3162/PA3601/PA3656/PA3742/PA3745/PA4237/PA4240/PA4248/PA4253/PA4257/PA4259/PA4263/PA4267/PA4271/PA4274/PA4432/PA4563/PA4568/PA5316	20	PA4145
GO:0005840	ribosome	9.46e-07	6.05e-05	5.81e-05	PA0579/PA3162/PA3601/PA3656/PA3742/PA3745/PA4237/PA4240/PA4248/PA4253/PA4259/PA4263/PA4271/PA4274/PA4432/PA4563/PA4568/PA5316	18	PA4145
GO:0000976	transcription regulatory region sequence-specific DNA binding	0.000157	0.017734	0.016189	PA1003/PA1097/PA1713/PA1898/PA2127/PA4296	6	PA4147
GO:0005615	extracellular space	0.000432	0.024402	0.022276	PA0844/PA0888/PA1249/PA4175	4	PA4147
GO:0006412	translation	1.63e-07	3.01e-05	2.87e-05	PA0579/PA3162/PA3601/PA3656/PA3745/PA4237/PA4241/PA4242/PA4249/PA4251/PA4257/PA4263/PA4264/PA4266/PA4267/PA4277/PA4563/PA4567/PA4568/PA4752	20	PA4157
GO:0003735	structural constituent of ribosome	2.16e-06	0.000199	0.00019	PA0579/PA3162/PA3601/PA3656/PA3745/PA4237/PA4241/PA4242/PA4249/PA4251/PA4257/PA4263/PA4264/PA4267/PA4563/PA4567/PA4568	17	PA4157
GO:0005840	ribosome	9.93e-06	0.000609	0.000582	PA0579/PA3162/PA3601/PA3656/PA3745/PA4237/PA4241/PA4242/PA4249/PA4251/PA4263/PA4264/PA4563/PA4567/PA4568	15	PA4157
GO:0003723	RNA binding	0.000203	0.008649	0.008263	PA2619/PA2975/PA3162/PA3817/PA4138/PA4241/PA4257/PA4563/PA4568/PA4727/PA4745/PA4937/PA4944/PA5118/PA5239	15	PA4157
GO:0044267	cellular protein metabolic process	0.000235	0.008649	0.008263	PA0903/PA2619/PA2620/PA2738/PA3049/PA3162/PA3656/PA3745/PA3824/PA4138/PA4237/PA4241/PA4242/PA4249/PA4251/PA4257/PA4263/PA4264/PA4266/PA4267/PA4567/PA4568	22	PA4157
GO:0016597	amino acid binding	0.001477	0.045304	0.043283	PA0602/PA4195/PA4307/PA4309/PA5076	5	PA4157
GO:0006412	translation	0.000101	0.008307	0.007465	PA2741/PA2970/PA4244/PA4265/PA4266/PA4268/PA4277	7	PA4185
GO:0009243	O antigen biosynthetic process	0.000324	0.013265	0.011919	PA3141/PA3151/PA3154/PA3159/PA3160	5	PA4185
GO:0003677	DNA binding	0.000788	0.021546	0.019361	PA0004/PA0576/PA0728/PA0979/PA1372/PA1430/PA1804/PA2299/PA2737/PA2738/PA3477/PA4269/PA4674	13	PA4185
GO:0044267	cellular protein metabolic process	1.16e-08	8.19e-07	7.37e-07	PA0019/PA0355/PA2742/PA2743/PA3724/PA4246/PA4249/PA4250/PA4251/PA4253/PA4256/PA4258/PA4260/PA4263/PA4267/PA4271/PA4559	17	PA4196
GO:0006412	translation	1.4e-08	8.19e-07	7.37e-07	PA2742/PA4246/PA4249/PA4250/PA4251/PA4253/PA4256/PA4258/PA4260/PA4263/PA4267/PA4271/PA4277	13	PA4196
GO:0003735	structural constituent of ribosome	2.69e-08	1.05e-06	9.43e-07	PA2742/PA4246/PA4249/PA4250/PA4251/PA4253/PA4256/PA4258/PA4260/PA4263/PA4267/PA4271	12	PA4196
GO:0005840	ribosome	7.73e-08	2.26e-06	2.04e-06	PA2742/PA4246/PA4249/PA4250/PA4251/PA4253/PA4256/PA4258/PA4260/PA4263/PA4271	11	PA4196
GO:1900233	positive regulation of single-species biofilm formation on inanimate substrate	3.99e-06	8.59e-05	7.73e-05	PA2523/PA3385/PA3622/PA4197/PA4296	5	PA4196
GO:0009243	O antigen biosynthetic process	4.4e-06	8.59e-05	7.73e-05	PA3141/PA3145/PA3149/PA3151/PA3154/PA3159/PA3160/PA5161	8	PA4196
GO:0009103	lipopolysaccharide biosynthetic process	0.000135	0.002254	0.002028	PA3141/PA3145/PA3150/PA3154/PA3160/PA3644	6	PA4196
GO:0009276	Gram-negative-bacterium-type cell wall	0.000628	0.009185	0.008264	PA3141/PA3145/PA3150/PA3154/PA3160/PA3644/PA3646/PA5161	8	PA4196
GO:0003723	RNA binding	0.001767	0.022975	0.020671	PA0715/PA3048/PA4246/PA4260/PA4727/PA4745/PA4937	7	PA4196
GO:0009243	O antigen biosynthetic process	7.03e-05	0.006885	0.006508	PA3141/PA3148/PA3149/PA3151/PA3152/PA3154	6	PA4296
GO:0000976	transcription regulatory region sequence-specific DNA binding	0.000192	0.030353	0.029929	PA1003/PA1097/PA1713/PA1898/PA3385/PA4296/PA4596/PA4764	8	PA4341
GO:0006412	translation	0.000121	0.024033	0.022103	PA0579/PA2741/PA3162/PA3653/PA3656/PA3745/PA4241/PA4248/PA4253/PA4263/PA4267/PA4268/PA4277/PA4433/PA4563/PA4568/PA4752/PA5316	18	PA4381
GO:0006412	translation	2.55e-08	4.11e-06	3.76e-06	PA3162/PA3653/PA3656/PA4240/PA4244/PA4254/PA4259/PA4265/PA4266/PA4268/PA4272/PA4273/PA4277/PA4433/PA4568/PA4671/PA4752/PA4934	18	PA4493
GO:0044267	cellular protein metabolic process	4.72e-06	0.00038	0.000348	PA0008/PA0956/PA2619/PA2620/PA2740/PA3161/PA3162/PA3653/PA3656/PA3818/PA4138/PA4240/PA4244/PA4254/PA4259/PA4265/PA4266/PA4268/PA4272/PA4273/PA4568	21	PA4493
GO:0003735	structural constituent of ribosome	0.000112	0.006021	0.005511	PA3162/PA3656/PA4240/PA4244/PA4254/PA4259/PA4268/PA4273/PA4433/PA4568/PA4671/PA4934	12	PA4493
GO:0003677	DNA binding	0.000313	0.012588	0.011523	PA0001/PA0004/PA0376/PA0472/PA0576/PA0652/PA0728/PA0979/PA1347/PA1372/PA1430/PA1544/PA1799/PA1804/PA1937/PA2586/PA2732/PA2957/PA3006/PA3133/PA3138/PA3140/PA3161/PA3477/PA4080/PA4234/PA4269/PA4270/PA4462/PA5261/PA5301/PA5348	32	PA4493
GO:0005840	ribosome	0.000741	0.023856	0.021836	PA3162/PA3656/PA4240/PA4254/PA4259/PA4268/PA4433/PA4568/PA4671/PA4934	10	PA4493
GO:0009243	O antigen biosynthetic process	0.001154	0.030964	0.028342	PA3141/PA3145/PA3146/PA3151/PA3158/PA5000/PA5447/PA5454	8	PA4493
GO:0003723	RNA binding	0.001394	0.032061	0.029346	PA2582/PA2619/PA2975/PA3162/PA4138/PA4273/PA4568/PA4745/PA4934/PA4937/PA5239	11	PA4493
GO:0006412	translation	7.55e-11	1.34e-08	1.28e-08	PA0579/PA2970/PA3162/PA3653/PA3656/PA3742/PA3745/PA4241/PA4248/PA4249/PA4250/PA4253/PA4255/PA4259/PA4263/PA4264/PA4267/PA4274/PA4277/PA4432/PA4433/PA4563/PA4568/PA4752	24	PA4784
GO:0003735	structural constituent of ribosome	1.16e-09	1.03e-07	9.79e-08	PA0579/PA2970/PA3162/PA3656/PA3742/PA3745/PA4241/PA4248/PA4249/PA4250/PA4253/PA4255/PA4259/PA4263/PA4264/PA4267/PA4274/PA4432/PA4433/PA4563/PA4568	21	PA4784
GO:0005840	ribosome	5.43e-09	3.22e-07	3.07e-07	PA0579/PA3162/PA3656/PA3742/PA3745/PA4241/PA4248/PA4249/PA4250/PA4253/PA4255/PA4259/PA4263/PA4264/PA4274/PA4432/PA4433/PA4563/PA4568	19	PA4784
GO:0044267	cellular protein metabolic process	5.88e-06	0.000262	0.000249	PA0009/PA0019/PA2620/PA2740/PA2970/PA3114/PA3162/PA3653/PA3656/PA3742/PA3745/PA3824/PA4138/PA4241/PA4248/PA4249/PA4250/PA4253/PA4255/PA4259/PA4263/PA4264/PA4267/PA4274/PA4568	25	PA4784
GO:0006928	movement of cell or subcellular component	0.008954	0.035816	0.018851	PA3361	1	PA4806
GO:0044267	cellular protein metabolic process	1.67e-08	7.81e-07	6.85e-07	PA0008/PA2620/PA2740/PA2970/PA3162/PA4241/PA4242/PA4254/PA4257/PA4262/PA4265/PA4266/PA4271/PA4274	14	PA4916
GO:0006412	translation	1.74e-08	7.81e-07	6.85e-07	PA2970/PA3162/PA4241/PA4242/PA4254/PA4257/PA4262/PA4265/PA4266/PA4271/PA4274	11	PA4916
GO:0003735	structural constituent of ribosome	6.86e-07	2.06e-05	1.8e-05	PA2970/PA3162/PA4241/PA4242/PA4254/PA4257/PA4262/PA4271/PA4274	9	PA4916
GO:0005840	ribosome	3.28e-05	0.000737	0.000647	PA3162/PA4241/PA4242/PA4254/PA4262/PA4271/PA4274	7	PA4916
GO:1900233	positive regulation of single-species biofilm formation on inanimate substrate	0.00074	0.013328	0.011692	PA2586/PA3622/PA4843	3	PA4916
GO:0016987	sigma factor activity	0.001361	0.017498	0.015349	PA0376/PA1776/PA3622/PA4462	4	PA4916
GO:0009243	O antigen biosynthetic process	2.8e-08	3.11e-06	2.83e-06	PA3141/PA3148/PA3149/PA3151/PA3152/PA3153/PA3159/PA3160/PA5000	9	PA5032
GO:0003723	RNA binding	7.18e-05	0.011338	0.009896	PA0715/PA2619/PA2975/PA3048/PA3162/PA3817/PA4138/PA4241/PA4257/PA4937/PA5118/PA5239	12	PA5116
GO:0000976	transcription regulatory region sequence-specific DNA binding	0.000658	0.049074	0.042829	PA1003/PA1544/PA1898/PA2127/PA2667/PA3006/PA3385/PA4296	8	PA5116
GO:1900233	positive regulation of single-species biofilm formation on inanimate substrate	0.001237	0.049074	0.042829	PA2586/PA3385/PA3622/PA4296	4	PA5116
GO:0006412	translation	0.00149	0.049074	0.042829	PA2970/PA3162/PA3742/PA4241/PA4249/PA4257/PA4263/PA4267/PA4274/PA4277	10	PA5116
GO:0003677	DNA binding	0.001951	0.049074	0.042829	PA0376/PA0576/PA0979/PA1154/PA1368/PA1430/PA1544/PA1799/PA1898/PA2586/PA2667/PA2735/PA3006/PA3133/PA3138/PA3140/PA3161/PA3263/PA3385/PA3622/PA4080/PA4269/PA4296/PA4462/PA5301/PA5337	26	PA5116
GO:0003735	structural constituent of ribosome	0.002055	0.049074	0.042829	PA2970/PA3162/PA3742/PA4241/PA4249/PA4257/PA4263/PA4267/PA4274	9	PA5116
GO:0044267	cellular protein metabolic process	0.002228	0.049074	0.042829	PA2619/PA2620/PA2740/PA2970/PA3161/PA3162/PA3742/PA4138/PA4241/PA4249/PA4257/PA4263/PA4267/PA4274	14	PA5116
GO:0002047	phenazine biosynthetic process	0.002485	0.049074	0.042829	PA0051/PA1899/PA1900/PA4209/PA4211	5	PA5116
GO:0005840	ribosome	4.24e-06	0.000401	0.000362	PA3162/PA3656/PA3742/PA3744/PA4240/PA4252/PA4256/PA4259/PA4262/PA4274/PA4432/PA4563/PA4568/PA4741	14	PA5218
GO:0006412	translation	4.78e-06	0.000401	0.000362	PA3162/PA3653/PA3656/PA3742/PA4240/PA4252/PA4256/PA4259/PA4262/PA4267/PA4274/PA4277/PA4432/PA4563/PA4568/PA4741	16	PA5218
GO:0003735	structural constituent of ribosome	1.85e-05	0.001036	0.000935	PA3162/PA3656/PA3742/PA4240/PA4252/PA4256/PA4259/PA4262/PA4267/PA4274/PA4432/PA4563/PA4568/PA4741	14	PA5218
GO:0020037	heme binding	2.72e-05	0.00114	0.001029	PA0007/PA1554/PA1556/PA1557/PA1838/PA2482/PA3032/PA3408/PA3747/PA4371/PA4571/PA4613/PA4709/PA5248/PA5491	15	PA5218
GO:0015891	siderophore transport	0.000571	0.019184	0.017309	PA0151/PA0931/PA1322/PA3268/PA4156/PA4675/PA5531	7	PA5218
GO:0044267	cellular protein metabolic process	0.000859	0.023723	0.021405	PA0009/PA2740/PA2743/PA3162/PA3653/PA3656/PA3742/PA3824/PA4240/PA4252/PA4256/PA4259/PA4262/PA4267/PA4274/PA4559/PA4568/PA4741	18	PA5218
GO:0003723	RNA binding	0.00113	0.023723	0.021405	PA2975/PA3048/PA3162/PA4252/PA4563/PA4568/PA4727/PA4741/PA4937/PA4944/PA5118/PA5239	12	PA5218
GO:0016987	sigma factor activity	0.001721	0.032119	0.02898	PA0472/PA0576/PA1455/PA3622/PA3899/PA4462/PA4896	7	PA5218
GO:0038023	signaling receptor activity	0.002184	0.036696	0.033109	PA0151/PA0931/PA1302/PA1322/PA3268/PA3408/PA4675	7	PA5218
GO:0009279	cell outer membrane	0.002739	0.041829	0.037741	PA0151/PA0931/PA0973/PA1322/PA3268/PA3648/PA4675	7	PA5218
GO:0006091	generation of precursor metabolites and energy	0.003228	0.045196	0.040778	PA0609/PA1320/PA1787/PA2623/PA2637/PA2999/PA3032/PA3171/PA3397/PA3621/PA3930/PA4971/PA5015/PA5304	14	PA5218
GO:0006412	translation	0.000132	0.023962	0.022993	PA3162/PA3653/PA3656/PA3742/PA3745/PA4241/PA4249/PA4264/PA4268/PA4277/PA4433/PA4568/PA4752/PA5316	14	PA5255
GO:1900233	positive regulation of single-species biofilm formation on inanimate substrate	4.12e-05	0.006184	0.005902	PA2523/PA2586/PA3622/PA4296/PA4843	5	PA5283
GO:0009243	O antigen biosynthetic process	2.02e-08	1.47e-06	1.21e-06	PA3148/PA3149/PA3151/PA3152/PA3153/PA3154/PA3160/PA5161	8	PA5342
GO:0009243	O antigen biosynthetic process	0.000101	0.013015	0.0125	PA3148/PA3149/PA3152/PA3153/PA3154/PA3159/PA3160	7	PA5382
GO:1900233	positive regulation of single-species biofilm formation on inanimate substrate	0.00019	0.013015	0.0125	PA2586/PA3622/PA4101/PA4843	4	PA5382
GO:0006412	translation	1.35e-08	2.32e-06	2.15e-06	PA0579/PA4239/PA4240/PA4245/PA4248/PA4250/PA4259/PA4263/PA4265/PA4266/PA4267/PA4271/PA4272/PA4274/PA4277/PA4568/PA4741/PA4752/PA5316	19	PA5389
GO:0009243	O antigen biosynthetic process	1.51e-06	0.000129	0.00012	PA0938/PA3141/PA3148/PA3149/PA3151/PA3152/PA3155/PA3159/PA3160/PA5000/PA5161/PA5454	12	PA5389
GO:0044267	cellular protein metabolic process	4.43e-06	0.000252	0.000235	PA0355/PA0903/PA2620/PA2740/PA2743/PA4138/PA4239/PA4240/PA4245/PA4248/PA4250/PA4259/PA4263/PA4265/PA4266/PA4267/PA4271/PA4272/PA4274/PA4568/PA4741/PA5489	22	PA5389
GO:0003735	structural constituent of ribosome	1.08e-05	0.000462	0.000429	PA0579/PA4239/PA4240/PA4245/PA4248/PA4250/PA4259/PA4263/PA4267/PA4271/PA4274/PA4568/PA4741/PA5316	14	PA5389
GO:0003924	GTPase activity	0.000101	0.003467	0.003223	PA3746/PA4265/PA4266/PA4277/PA4407/PA4566/PA5567	7	PA5389
GO:0005840	ribosome	0.000325	0.009273	0.008619	PA0579/PA4240/PA4248/PA4250/PA4259/PA4263/PA4271/PA4274/PA4568/PA4741/PA5316	11	PA5389
GO:0005525	GTP binding	0.000774	0.018909	0.017576	PA3746/PA4265/PA4266/PA4277/PA4407/PA4566/PA5567	7	PA5389
GO:0006412	translation	1.64e-11	2.56e-09	2.5e-09	PA2970/PA3162/PA3601/PA3742/PA4241/PA4248/PA4250/PA4253/PA4255/PA4260/PA4263/PA4265/PA4267/PA4271/PA4272/PA4274/PA4277/PA4433/PA4741/PA5316	20	PA5428
GO:0003735	structural constituent of ribosome	9.46e-10	7.38e-08	7.22e-08	PA2970/PA3162/PA3601/PA3742/PA4241/PA4248/PA4250/PA4253/PA4255/PA4260/PA4263/PA4267/PA4271/PA4274/PA4433/PA4741/PA5316	17	PA5428
GO:0005840	ribosome	1.12e-08	5.82e-07	5.7e-07	PA3162/PA3601/PA3742/PA4241/PA4248/PA4250/PA4253/PA4255/PA4260/PA4263/PA4271/PA4274/PA4433/PA4741/PA5316	15	PA5428
GO:0044267	cellular protein metabolic process	2.09e-07	8.15e-06	7.98e-06	PA0019/PA2620/PA2740/PA2743/PA2970/PA3162/PA3742/PA4138/PA4241/PA4248/PA4250/PA4253/PA4255/PA4260/PA4263/PA4265/PA4267/PA4271/PA4272/PA4274/PA4741	21	PA5428
GO:0003723	RNA binding	1.23e-05	0.000384	0.000376	PA2975/PA3048/PA3162/PA3817/PA4138/PA4241/PA4260/PA4727/PA4741/PA4937/PA4944/PA5118/PA5239	13	PA5428
GO:0009243	O antigen biosynthetic process	1.72e-05	0.000669	0.000614	PA3148/PA3149/PA3151/PA3152	4	PA5550
GO:0000105	histidine biosynthetic process	0.001607	0.031335	0.028756	PA3151/PA3152	2	PA5550
