# Supplementary material for: Global transcription factors analyses reveal hierarchy and synergism of regulatory networks and master virulence regulators in Pseudomonas aeruginosa
Source: eLife. 2026 Apr 16;14:RP103346. doi: 10.7554/eLife.103346 (PMC13086498; doi:10.7554/eLife.103346)
Supplement: Supplementary file 5. [file elife-103346-supp5.xlsx]

## Sheet: Supplementary File 5
Supplementary File5. PWM pairwise similarity scores.
TF1	TF2	Similarity_Score
PA0056_TYSRCSHGSDCCDBS	PA0034_CWKGNSSWSCWMGYSSTHGA	0.700779
PA0155_GSTTTCGA	PA0034_CWKGNSSWSCWMGYSSTHGA	0.41138
PA0163_WYGTCGVYGANCWSS	PA0034_CWKGNSSWSCWMGYSSTHGA	0.564718
PA0167_ARSAKSADCAGGWHG	PA0034_CWKGNSSWSCWMGYSSTHGA	0.484143
PA0207_ARAAAAAAWYTTTGA	PA0034_CWKGNSSWSCWMGYSSTHGA	0.319991
PA0217_TMAWHWATAWRAAYAADHAA	PA0034_CWKGNSSWSCWMGYSSTHGA	0.255172
PA0218_CTGCTCGSCGH	PA0034_CWKGNSSWSCWMGYSSTHGA	0.638031
PA0233_YCCTGSTGSTGATCS	PA0034_CWKGNSSWSCWMGYSSTHGA	0.514524
PA0243_MCSVACCAGKTCGWYCABS	PA0034_CWKGNSSWSCWMGYSSTHGA	0.492448
PA0279_GCTCTACCAACTGAGCTAY	PA0034_CWKGNSSWSCWMGYSSTHGA	0.454124
PA0306_WTTGAAAATMAATA	PA0034_CWKGNSSWSCWMGYSSTHGA	0.252531
PA0367_TGAAYRSCDTTYNS	PA0034_CWKGNSSWSCWMGYSSTHGA	0.585839
PA0403_TATAATSNSCGSYTTTHTTB	PA0034_CWKGNSSWSCWMGYSSTHGA	0.321515
PA0448_WGSTGCTS	PA0034_CWKGNSSWSCWMGYSSTHGA	0.534713
PA0475_SCTCGNCGDYSWYSTBGTCG	PA0034_CWKGNSSWSCWMGYSSTHGA	0.697255
PA0527_WDWWWAWYYTYTAMWWRMAW	PA0034_CWKGNSSWSCWMGYSSTHGA	0.132691
PA0533_CTGSTSGVCVWSGBC	PA0034_CWKGNSSWSCWMGYSSTHGA	0.713187
PA0601_CCAGCRCCWGS	PA0034_CWKGNSSWSCWMGYSSTHGA	0.659886
PA0701_AATAVAAAATAAWWA	PA0034_CWKGNSSWSCWMGYSSTHGA	0.252893
PA0756_MTSGBCCWGKKCCWGCAGGW	PA0034_CWKGNSSWSCWMGYSSTHGA	0.775072
PA0797_TGSYGSCGSTGVWSG	PA0034_CWKGNSSWSCWMGYSSTHGA	0.684888
PA0815_SNCSWYCAGCASSDCGRTSW	PA0034_CWKGNSSWSCWMGYSSTHGA	0.489114
PA0816_MTWRWTATTTTTWWTBWATT	PA0034_CWKGNSSWSCWMGYSSTHGA	0.176202
PA0831_TGGCCGRVHWSGACC	PA0034_CWKGNSSWSCWMGYSSTHGA	0.521847
PA0873_WAANWWTDMAHAAAAMAAWT	PA0034_CWKGNSSWSCWMGYSSTHGA	0.133066
PA0876_RWAWNAAWAAATWMWWAAWA	PA0034_CWKGNSSWSCWMGYSSTHGA	0.0358359
PA0893_GCGACATC	PA0034_CWKGNSSWSCWMGYSSTHGA	0.519652
PA0942_WSCGSRTCGACASCR	PA0034_CWKGNSSWSCWMGYSSTHGA	0.537682
PA1015_CSBGAATGSCRTTCA	PA0034_CWKGNSSWSCWMGYSSTHGA	0.464061
PA1136_AWTAAAAAWAAWTAWTHAWW	PA0034_CWKGNSSWSCWMGYSSTHGA	0.0170129
PA1157_WATDTTTTTTATWKATWTTT	PA0034_CWKGNSSWSCWMGYSSTHGA	0.111477
PA1182_SHSSHGSTGMTCGVC	PA0034_CWKGNSSWSCWMGYSSTHGA	0.617683
PA1184_WTWTTTTTWATTHATWKTTW	PA0034_CWKGNSSWSCWMGYSSTHGA	0.1664
PA1229_SWYGDYCWYGBCGRT	PA0034_CWKGNSSWSCWMGYSSTHGA	0.713975
PA1261_AAWAVAAWWTAAAAA	PA0034_CWKGNSSWSCWMGYSSTHGA	0.185521
PA1283_WWWWWTGWATAAAAAHWWTW	PA0034_CWKGNSSWSCWMGYSSTHGA	0.0496277
PA1309_TYGKCSWKGKYSWYSASSDY	PA0034_CWKGNSSWSCWMGYSSTHGA	0.632499
PA1347_CRNCRVCWTCRHCR	PA0034_CWKGNSSWSCWMGYSSTHGA	0.542877
PA1403_AHCWACRRCRWCAMC	PA0034_CWKGNSSWSCWMGYSSTHGA	0.600231
PA1504_SCAGGAHGVCCAGGA	PA0034_CWKGNSSWSCWMGYSSTHGA	0.551444
PA1653_RAVHWSGTCAASCTG	PA0034_CWKGNSSWSCWMGYSSTHGA	0.578123
PA1759_AATARAWAWDAAWAA	PA0034_CWKGNSSWSCWMGYSSTHGA	0.246477
PA1836_SWSGTMGAYSWBSDY	PA0034_CWKGNSSWSCWMGYSSTHGA	0.730831
PA1853_SSANSRCCWSGVYGA	PA0034_CWKGNSSWSCWMGYSSTHGA	0.74579
PA1859_TTTTTRTTWTTWATT	PA0034_CWKGNSSWSCWMGYSSTHGA	0.269863
PA1978_TTGNYGWYCWBGHCG	PA0034_CWKGNSSWSCWMGYSSTHGA	0.54121
PA1998_TGCTCGVC	PA0034_CWKGNSSWSCWMGYSSTHGA	0.791631
PA2010_CTSCTCGSCGNSSNS	PA0034_CWKGNSSWSCWMGYSSTHGA	0.584418
PA2032_SWSGATCWGGYCGANCAGSH	PA0034_CWKGNSSWSCWMGYSSTHGA	0.725112
PA2047_YGAKCAHCRSCAGSR	PA0034_CWKGNSSWSCWMGYSSTHGA	0.65404
PA2056_YCRWSSWGDWCRMCS	PA0034_CWKGNSSWSCWMGYSSTHGA	0.882163
PA2096_MWGGHCRACDHCMWS	PA0034_CWKGNSSWSCWMGYSSTHGA	0.604132
PA2123_GRCCKCGTYGATSRCCAYST	PA0034_CWKGNSSWSCWMGYSSTHGA	0.604475
PA2246_WSCBSSASYTCGMCSAS	PA0034_CWKGNSSWSCWMGYSSTHGA	0.661956
PA2270_WAWYCWAWWHWTYHKYAAAW	PA0034_CWKGNSSWSCWMGYSSTHGA	0.21177
PA2276_WCSTBCTYGADSTYSWYS	PA0034_CWKGNSSWSCWMGYSSTHGA	0.815542
PA2281_TTGDCCWTGTMGADG	PA0034_CWKGNSSWSCWMGYSSTHGA	0.612202
PA2299_CWGGTMGWHCAKGTC	PA0034_CWKGNSSWSCWMGYSSTHGA	0.755382
PA2417_DCGSCGARCAG	PA0034_CWKGNSSWSCWMGYSSTHGA	0.652745
PA2447_WSGNCRMSSWSNYC	PA0034_CWKGNSSWSCWMGYSSTHGA	0.666755
PA2449_HTTMWTWWWTDTTHBTTRTT	PA0034_CWKGNSSWSCWMGYSSTHGA	0.128171
PA2488_WWWAACWTTKAWTWVAAWAT	PA0034_CWKGNSSWSCWMGYSSTHGA	0.164749
PA2547_TCNNCDVCMHSRHCDDCGSC	PA0034_CWKGNSSWSCWMGYSSTHGA	0.623571
PA2551_GAHGRTCRSCA	PA0034_CWKGNSSWSCWMGYSSTHGA	0.543138
PA2556_VTGAKCRNCYHGGACAAS	PA0034_CWKGNSSWSCWMGYSSTHGA	0.522345
PA2601_HCSAGCAGGNYCWGG	PA0034_CWKGNSSWSCWMGYSSTHGA	0.612871
PA2692_WAAAWATDAWTWAARAAWWT	PA0034_CWKGNSSWSCWMGYSSTHGA	0.129273
PA2696_WGRTCWTCGVC	PA0034_CWKGNSSWSCWMGYSSTHGA	0.675537
PA2704_TGGCCDBSBCGATCC	PA0034_CWKGNSSWSCWMGYSSTHGA	0.610063
PA2718_WWWADATNYHAWWWAWDMAT	PA0034_CWKGNSSWSCWMGYSSTHGA	0.088251
PA2766_ATDNATTWWDARMATWTWWW	PA0034_CWKGNSSWSCWMGYSSTHGA	0.148493
PA2848_CTGHTSDDCRHCVHS	PA0034_CWKGNSSWSCWMGYSSTHGA	0.695094
PA2917_TSRASGAMVWGBYSRWGSMG	PA0034_CWKGNSSWSCWMGYSSTHGA	0.674057
PA2930_WATAGGRMAATTCCYAWWKW	PA0034_CWKGNSSWSCWMGYSSTHGA	0.209026
PA2957_TCVASCAGTTC	PA0034_CWKGNSSWSCWMGYSSTHGA	0.733242
PA3027_AATDAAAAANAATAA	PA0034_CWKGNSSWSCWMGYSSTHGA	0.148263
PA3045_STTGKYGSCGDTGABGTWGT	PA0034_CWKGNSSWSCWMGYSSTHGA	0.511169
PA3094_BSBSCTGBTCGAYCTSSWYG	PA0034_CWKGNSSWSCWMGYSSTHGA	0.644709
PA3122_NGGAATRS	PA0034_CWKGNSSWSCWMGYSSTHGA	0.33649
PA3124_CSATGMYNHSYTGGAATDC	PA0034_CWKGNSSWSCWMGYSSTHGA	0.466491
PA3174_TTGMMCNRSRKCGAC	PA0034_CWKGNSSWSCWMGYSSTHGA	0.481708
PA3215_WWWAAATAHTWKWWAAWHA	PA0034_CWKGNSSWSCWMGYSSTHGA	0.142191
PA3220_TTTWTADTCMTWTBBWTATA	PA0034_CWKGNSSWSCWMGYSSTHGA	0.139878
PA3260_TTWTTAWTWTYTDTT	PA0034_CWKGNSSWSCWMGYSSTHGA	0.158408
PA3420_TGGCCDBSNYGRWCCY	PA0034_CWKGNSSWSCWMGYSSTHGA	0.550714
PA3433_WYGMBSWTGNCGWTG	PA0034_CWKGNSSWSCWMGYSSTHGA	0.557993
PA3508_TTMAAAAWAAWAAWY	PA0034_CWKGNSSWSCWMGYSSTHGA	0.156561
PA3565_TTTTTATTTTHWMTW	PA0034_CWKGNSSWSCWMGYSSTHGA	0.264897
PA3587_KCRNSNYGYTCATS	PA0034_CWKGNSSWSCWMGYSSTHGA	0.580073
PA3604_TYSNSGDYGWYSTBG	PA0034_CWKGNSSWSCWMGYSSTHGA	0.620056
PA3699_DNAWYGAGAAH	PA0034_CWKGNSSWSCWMGYSSTHGA	0.252728
PA3776_TCGSCCWG	PA0034_CWKGNSSWSCWMGYSSTHGA	0.837662
PA3830_TBSWYGBCGRYCWKS	PA0034_CWKGNSSWSCWMGYSSTHGA	0.679314
PA3845_WWWAAHDDWTWTTTDYWWWW	PA0034_CWKGNSSWSCWMGYSSTHGA	0.130649
PA3927_CAWCGWSAWSRCSMTSDMCG	PA0034_CWKGNSSWSCWMGYSSTHGA	0.535031
PA3965_WHCGAAAS	PA0034_CWKGNSSWSCWMGYSSTHGA	0.31803
PA3973_CVWCGSCGASCWGRYCBDCR	PA0034_CWKGNSSWSCWMGYSSTHGA	0.648463
PA4070_AWDRMAWAWDAAAAA	PA0034_CWKGNSSWSCWMGYSSTHGA	0.245302
PA4094_CSAGCAGCAGS	PA0034_CWKGNSSWSCWMGYSSTHGA	0.534121
PA4145_TKAWTYAAAAABAWTWWTT	PA0034_CWKGNSSWSCWMGYSSTHGA	0.197238
PA4157_YSDBGNYSAKCAGSWYGA	PA0034_CWKGNSSWSCWMGYSSTHGA	0.651319
PA4165_YSKYSTYGVYCAKSWHGBGS	PA0034_CWKGNSSWSCWMGYSSTHGA	0.629606
PA0034_CWKGNSSWSCWMGYSSTHGA	PA0056_TYSRCSHGSDCCDBS	0.700779
PA0155_GSTTTCGA	PA0056_TYSRCSHGSDCCDBS	0.266361
PA0163_WYGTCGVYGANCWSS	PA0056_TYSRCSHGSDCCDBS	0.562218
PA0167_ARSAKSADCAGGWHG	PA0056_TYSRCSHGSDCCDBS	0.551111
PA0207_ARAAAAAAWYTTTGA	PA0056_TYSRCSHGSDCCDBS	0.258243
PA0217_TMAWHWATAWRAAYAADHAA	PA0056_TYSRCSHGSDCCDBS	0.0546787
PA0218_CTGCTCGSCGH	PA0056_TYSRCSHGSDCCDBS	0.634084
PA0233_YCCTGSTGSTGATCS	PA0056_TYSRCSHGSDCCDBS	0.624483
PA0243_MCSVACCAGKTCGWYCABS	PA0056_TYSRCSHGSDCCDBS	0.706787
PA0279_GCTCTACCAACTGAGCTAY	PA0056_TYSRCSHGSDCCDBS	0.418895
PA0306_WTTGAAAATMAATA	PA0056_TYSRCSHGSDCCDBS	0.222245
PA0367_TGAAYRSCDTTYNS	PA0056_TYSRCSHGSDCCDBS	0.333195
PA0403_TATAATSNSCGSYTTTHTTB	PA0056_TYSRCSHGSDCCDBS	0.311667
PA0448_WGSTGCTS	PA0056_TYSRCSHGSDCCDBS	0.618723
PA0475_SCTCGNCGDYSWYSTBGTCG	PA0056_TYSRCSHGSDCCDBS	0.64096
PA0527_WDWWWAWYYTYTAMWWRMAW	PA0056_TYSRCSHGSDCCDBS	0.111137
PA0533_CTGSTSGVCVWSGBC	PA0056_TYSRCSHGSDCCDBS	0.624921
PA0601_CCAGCRCCWGS	PA0056_TYSRCSHGSDCCDBS	0.809178
PA0701_AATAVAAAATAAWWA	PA0056_TYSRCSHGSDCCDBS	0.276095
PA0756_MTSGBCCWGKKCCWGCAGGW	PA0056_TYSRCSHGSDCCDBS	0.605118
PA0797_TGSYGSCGSTGVWSG	PA0056_TYSRCSHGSDCCDBS	0.716665
PA0815_SNCSWYCAGCASSDCGRTSW	PA0056_TYSRCSHGSDCCDBS	0.639053
PA0816_MTWRWTATTTTTWWTBWATT	PA0056_TYSRCSHGSDCCDBS	0.132783
PA0831_TGGCCGRVHWSGACC	PA0056_TYSRCSHGSDCCDBS	0.789302
PA0873_WAANWWTDMAHAAAAMAAWT	PA0056_TYSRCSHGSDCCDBS	0.104614
PA0876_RWAWNAAWAAATWMWWAAWA	PA0056_TYSRCSHGSDCCDBS	0.150196
PA0893_GCGACATC	PA0056_TYSRCSHGSDCCDBS	0.445905
PA0942_WSCGSRTCGACASCR	PA0056_TYSRCSHGSDCCDBS	0.821829
PA1015_CSBGAATGSCRTTCA	PA0056_TYSRCSHGSDCCDBS	0.489278
PA1136_AWTAAAAAWAAWTAWTHAWW	PA0056_TYSRCSHGSDCCDBS	0.0829911
PA1157_WATDTTTTTTATWKATWTTT	PA0056_TYSRCSHGSDCCDBS	0.0695445
PA1182_SHSSHGSTGMTCGVC	PA0056_TYSRCSHGSDCCDBS	0.609916
PA1184_WTWTTTTTWATTHATWKTTW	PA0056_TYSRCSHGSDCCDBS	0.0434793
PA1229_SWYGDYCWYGBCGRT	PA0056_TYSRCSHGSDCCDBS	0.638085
PA1261_AAWAVAAWWTAAAAA	PA0056_TYSRCSHGSDCCDBS	0.229941
PA1283_WWWWWTGWATAAAAAHWWTW	PA0056_TYSRCSHGSDCCDBS	0.0467336
PA1309_TYGKCSWKGKYSWYSASSDY	PA0056_TYSRCSHGSDCCDBS	0.714263
PA1347_CRNCRVCWTCRHCR	PA0056_TYSRCSHGSDCCDBS	0.597825
PA1403_AHCWACRRCRWCAMC	PA0056_TYSRCSHGSDCCDBS	0.48815
PA1504_SCAGGAHGVCCAGGA	PA0056_TYSRCSHGSDCCDBS	0.784882
PA1653_RAVHWSGTCAASCTG	PA0056_TYSRCSHGSDCCDBS	0.701615
PA1759_AATARAWAWDAAWAA	PA0056_TYSRCSHGSDCCDBS	0.249467
PA1836_SWSGTMGAYSWBSDY	PA0056_TYSRCSHGSDCCDBS	0.695094
PA1853_SSANSRCCWSGVYGA	PA0056_TYSRCSHGSDCCDBS	0.773902
PA1859_TTTTTRTTWTTWATT	PA0056_TYSRCSHGSDCCDBS	0.190531
PA1978_TTGNYGWYCWBGHCG	PA0056_TYSRCSHGSDCCDBS	0.604118
PA1998_TGCTCGVC	PA0056_TYSRCSHGSDCCDBS	0.431231
PA2010_CTSCTCGSCGNSSNS	PA0056_TYSRCSHGSDCCDBS	0.561995
PA2032_SWSGATCWGGYCGANCAGSH	PA0056_TYSRCSHGSDCCDBS	0.614544
PA2047_YGAKCAHCRSCAGSR	PA0056_TYSRCSHGSDCCDBS	0.741378
PA2056_YCRWSSWGDWCRMCS	PA0056_TYSRCSHGSDCCDBS	0.602506
PA2096_MWGGHCRACDHCMWS	PA0056_TYSRCSHGSDCCDBS	0.793321
PA2123_GRCCKCGTYGATSRCCAYST	PA0056_TYSRCSHGSDCCDBS	0.601059
PA2246_WSCBSSASYTCGMCSAS	PA0056_TYSRCSHGSDCCDBS	0.69661
PA2270_WAWYCWAWWHWTYHKYAAAW	PA0056_TYSRCSHGSDCCDBS	0.269336
PA2276_WCSTBCTYGADSTYSWYS	PA0056_TYSRCSHGSDCCDBS	0.789169
PA2281_TTGDCCWTGTMGADG	PA0056_TYSRCSHGSDCCDBS	0.592705
PA2299_CWGGTMGWHCAKGTC	PA0056_TYSRCSHGSDCCDBS	0.712786
PA2417_DCGSCGARCAG	PA0056_TYSRCSHGSDCCDBS	0.592072
PA2447_WSGNCRMSSWSNYC	PA0056_TYSRCSHGSDCCDBS	0.662629
PA2449_HTTMWTWWWTDTTHBTTRTT	PA0056_TYSRCSHGSDCCDBS	0.0418089
PA2488_WWWAACWTTKAWTWVAAWAT	PA0056_TYSRCSHGSDCCDBS	0.129905
PA2547_TCNNCDVCMHSRHCDDCGSC	PA0056_TYSRCSHGSDCCDBS	0.60336
PA2551_GAHGRTCRSCA	PA0056_TYSRCSHGSDCCDBS	0.584008
PA2556_VTGAKCRNCYHGGACAAS	PA0056_TYSRCSHGSDCCDBS	0.580047
PA2601_HCSAGCAGGNYCWGG	PA0056_TYSRCSHGSDCCDBS	0.798861
PA2692_WAAAWATDAWTWAARAAWWT	PA0056_TYSRCSHGSDCCDBS	0.10362
PA2696_WGRTCWTCGVC	PA0056_TYSRCSHGSDCCDBS	0.509669
PA2704_TGGCCDBSBCGATCC	PA0056_TYSRCSHGSDCCDBS	0.676669
PA2718_WWWADATNYHAWWWAWDMAT	PA0056_TYSRCSHGSDCCDBS	0.0465235
PA2766_ATDNATTWWDARMATWTWWW	PA0056_TYSRCSHGSDCCDBS	0.14597
PA2848_CTGHTSDDCRHCVHS	PA0056_TYSRCSHGSDCCDBS	0.678275
PA2917_TSRASGAMVWGBYSRWGSMG	PA0056_TYSRCSHGSDCCDBS	0.683929
PA2930_WATAGGRMAATTCCYAWWKW	PA0056_TYSRCSHGSDCCDBS	0.237521
PA2957_TCVASCAGTTC	PA0056_TYSRCSHGSDCCDBS	0.695553
PA3027_AATDAAAAANAATAA	PA0056_TYSRCSHGSDCCDBS	0.173661
PA3045_STTGKYGSCGDTGABGTWGT	PA0056_TYSRCSHGSDCCDBS	0.462499
PA3094_BSBSCTGBTCGAYCTSSWYG	PA0056_TYSRCSHGSDCCDBS	0.674115
PA3122_NGGAATRS	PA0056_TYSRCSHGSDCCDBS	0.418077
PA3124_CSATGMYNHSYTGGAATDC	PA0056_TYSRCSHGSDCCDBS	0.529144
PA3174_TTGMMCNRSRKCGAC	PA0056_TYSRCSHGSDCCDBS	0.450644
PA3215_WWWAAATAHTWKWWAAWHA	PA0056_TYSRCSHGSDCCDBS	0.00501873
PA3220_TTTWTADTCMTWTBBWTATA	PA0056_TYSRCSHGSDCCDBS	0.204507
PA3260_TTWTTAWTWTYTDTT	PA0056_TYSRCSHGSDCCDBS	0.137605
PA3420_TGGCCDBSNYGRWCCY	PA0056_TYSRCSHGSDCCDBS	0.676379
PA3433_WYGMBSWTGNCGWTG	PA0056_TYSRCSHGSDCCDBS	0.581804
PA3508_TTMAAAAWAAWAAWY	PA0056_TYSRCSHGSDCCDBS	0.0768161
PA3565_TTTTTATTTTHWMTW	PA0056_TYSRCSHGSDCCDBS	0.108556
PA3587_KCRNSNYGYTCATS	PA0056_TYSRCSHGSDCCDBS	0.516003
PA3604_TYSNSGDYGWYSTBG	PA0056_TYSRCSHGSDCCDBS	0.69604
PA3699_DNAWYGAGAAH	PA0056_TYSRCSHGSDCCDBS	0.500838
PA3776_TCGSCCWG	PA0056_TYSRCSHGSDCCDBS	0.718047
PA3830_TBSWYGBCGRYCWKS	PA0056_TYSRCSHGSDCCDBS	0.785794
PA3845_WWWAAHDDWTWTTTDYWWWW	PA0056_TYSRCSHGSDCCDBS	0.0714318
PA3927_CAWCGWSAWSRCSMTSDMCG	PA0056_TYSRCSHGSDCCDBS	0.622957
PA3965_WHCGAAAS	PA0056_TYSRCSHGSDCCDBS	0.25824
PA3973_CVWCGSCGASCWGRYCBDCR	PA0056_TYSRCSHGSDCCDBS	0.679848
PA4070_AWDRMAWAWDAAAAA	PA0056_TYSRCSHGSDCCDBS	0.109427
PA4094_CSAGCAGCAGS	PA0056_TYSRCSHGSDCCDBS	0.642773
PA4145_TKAWTYAAAAABAWTWWTT	PA0056_TYSRCSHGSDCCDBS	0.18962
PA4157_YSDBGNYSAKCAGSWYGA	PA0056_TYSRCSHGSDCCDBS	0.558567
PA4165_YSKYSTYGVYCAKSWHGBGS	PA0056_TYSRCSHGSDCCDBS	0.677957
PA0034_CWKGNSSWSCWMGYSSTHGA	PA0155_GSTTTCGA	0.41138
PA0056_TYSRCSHGSDCCDBS	PA0155_GSTTTCGA	0.266361
PA0163_WYGTCGVYGANCWSS	PA0155_GSTTTCGA	0.414612
PA0167_ARSAKSADCAGGWHG	PA0155_GSTTTCGA	0.322814
PA0207_ARAAAAAAWYTTTGA	PA0155_GSTTTCGA	0.395649
PA0217_TMAWHWATAWRAAYAADHAA	PA0155_GSTTTCGA	0.387412
PA0218_CTGCTCGSCGH	PA0155_GSTTTCGA	0.221399
PA0233_YCCTGSTGSTGATCS	PA0155_GSTTTCGA	0.424295
PA0243_MCSVACCAGKTCGWYCABS	PA0155_GSTTTCGA	0.494912
PA0279_GCTCTACCAACTGAGCTAY	PA0155_GSTTTCGA	0.306567
PA0306_WTTGAAAATMAATA	PA0155_GSTTTCGA	0.515741
PA0367_TGAAYRSCDTTYNS	PA0155_GSTTTCGA	0.466817
PA0403_TATAATSNSCGSYTTTHTTB	PA0155_GSTTTCGA	0.409891
PA0448_WGSTGCTS	PA0155_GSTTTCGA	0.25963
PA0475_SCTCGNCGDYSWYSTBGTCG	PA0155_GSTTTCGA	0.486549
PA0527_WDWWWAWYYTYTAMWWRMAW	PA0155_GSTTTCGA	0.406092
PA0533_CTGSTSGVCVWSGBC	PA0155_GSTTTCGA	0.229964
PA0601_CCAGCRCCWGS	PA0155_GSTTTCGA	0.352872
PA0701_AATAVAAAATAAWWA	PA0155_GSTTTCGA	0.44695
PA0756_MTSGBCCWGKKCCWGCAGGW	PA0155_GSTTTCGA	0.193871
PA0797_TGSYGSCGSTGVWSG	PA0155_GSTTTCGA	0.297625
PA0815_SNCSWYCAGCASSDCGRTSW	PA0155_GSTTTCGA	0.40157
PA0816_MTWRWTATTTTTWWTBWATT	PA0155_GSTTTCGA	0.32365
PA0831_TGGCCGRVHWSGACC	PA0155_GSTTTCGA	0.533982
PA0873_WAANWWTDMAHAAAAMAAWT	PA0155_GSTTTCGA	0.271157
PA0876_RWAWNAAWAAATWMWWAAWA	PA0155_GSTTTCGA	0.326597
PA0893_GCGACATC	PA0155_GSTTTCGA	0.454056
PA0942_WSCGSRTCGACASCR	PA0155_GSTTTCGA	0.797895
PA1015_CSBGAATGSCRTTCA	PA0155_GSTTTCGA	0.488927
PA1136_AWTAAAAAWAAWTAWTHAWW	PA0155_GSTTTCGA	0.327246
PA1157_WATDTTTTTTATWKATWTTT	PA0155_GSTTTCGA	0.191563
PA1182_SHSSHGSTGMTCGVC	PA0155_GSTTTCGA	0.218043
PA1184_WTWTTTTTWATTHATWKTTW	PA0155_GSTTTCGA	0.230956
PA1229_SWYGDYCWYGBCGRT	PA0155_GSTTTCGA	0.283105
PA1261_AAWAVAAWWTAAAAA	PA0155_GSTTTCGA	0.535039
PA1283_WWWWWTGWATAAAAAHWWTW	PA0155_GSTTTCGA	0.295309
PA1309_TYGKCSWKGKYSWYSASSDY	PA0155_GSTTTCGA	0.373211
PA1347_CRNCRVCWTCRHCR	PA0155_GSTTTCGA	0.438016
PA1403_AHCWACRRCRWCAMC	PA0155_GSTTTCGA	0.366048
PA1504_SCAGGAHGVCCAGGA	PA0155_GSTTTCGA	0.388652
PA1653_RAVHWSGTCAASCTG	PA0155_GSTTTCGA	0.387194
PA1759_AATARAWAWDAAWAA	PA0155_GSTTTCGA	0.371937
PA1836_SWSGTMGAYSWBSDY	PA0155_GSTTTCGA	0.356433
PA1853_SSANSRCCWSGVYGA	PA0155_GSTTTCGA	0.275001
PA1859_TTTTTRTTWTTWATT	PA0155_GSTTTCGA	0.541206
PA1978_TTGNYGWYCWBGHCG	PA0155_GSTTTCGA	0.344675
PA1998_TGCTCGVC	PA0155_GSTTTCGA	0.193744
PA2010_CTSCTCGSCGNSSNS	PA0155_GSTTTCGA	0.327593
PA2032_SWSGATCWGGYCGANCAGSH	PA0155_GSTTTCGA	0.321993
PA2047_YGAKCAHCRSCAGSR	PA0155_GSTTTCGA	0.38294
PA2056_YCRWSSWGDWCRMCS	PA0155_GSTTTCGA	0.332532
PA2096_MWGGHCRACDHCMWS	PA0155_GSTTTCGA	0.46504
PA2123_GRCCKCGTYGATSRCCAYST	PA0155_GSTTTCGA	0.368715
PA2246_WSCBSSASYTCGMCSAS	PA0155_GSTTTCGA	0.467811
PA2270_WAWYCWAWWHWTYHKYAAAW	PA0155_GSTTTCGA	0.579561
PA2276_WCSTBCTYGADSTYSWYS	PA0155_GSTTTCGA	0.521051
PA2281_TTGDCCWTGTMGADG	PA0155_GSTTTCGA	0.613815
PA2299_CWGGTMGWHCAKGTC	PA0155_GSTTTCGA	0.382884
PA2417_DCGSCGARCAG	PA0155_GSTTTCGA	0.174243
PA2447_WSGNCRMSSWSNYC	PA0155_GSTTTCGA	0.319699
PA2449_HTTMWTWWWTDTTHBTTRTT	PA0155_GSTTTCGA	0.368707
PA2488_WWWAACWTTKAWTWVAAWAT	PA0155_GSTTTCGA	0.370056
PA2547_TCNNCDVCMHSRHCDDCGSC	PA0155_GSTTTCGA	0.534793
PA2551_GAHGRTCRSCA	PA0155_GSTTTCGA	0.43667
PA2556_VTGAKCRNCYHGGACAAS	PA0155_GSTTTCGA	0.43275
PA2601_HCSAGCAGGNYCWGG	PA0155_GSTTTCGA	0.280977
PA2692_WAAAWATDAWTWAARAAWWT	PA0155_GSTTTCGA	0.208795
PA2696_WGRTCWTCGVC	PA0155_GSTTTCGA	0.35834
PA2704_TGGCCDBSBCGATCC	PA0155_GSTTTCGA	0.465139
PA2718_WWWADATNYHAWWWAWDMAT	PA0155_GSTTTCGA	0.347977
PA2766_ATDNATTWWDARMATWTWWW	PA0155_GSTTTCGA	0.311099
PA2848_CTGHTSDDCRHCVHS	PA0155_GSTTTCGA	0.334482
PA2917_TSRASGAMVWGBYSRWGSMG	PA0155_GSTTTCGA	0.369735
PA2930_WATAGGRMAATTCCYAWWKW	PA0155_GSTTTCGA	0.30813
PA2957_TCVASCAGTTC	PA0155_GSTTTCGA	0.407671
PA3027_AATDAAAAANAATAA	PA0155_GSTTTCGA	0.34247
PA3045_STTGKYGSCGDTGABGTWGT	PA0155_GSTTTCGA	0.434386
PA3094_BSBSCTGBTCGAYCTSSWYG	PA0155_GSTTTCGA	0.439753
PA3122_NGGAATRS	PA0155_GSTTTCGA	0.330874
PA3124_CSATGMYNHSYTGGAATDC	PA0155_GSTTTCGA	0.397236
PA3174_TTGMMCNRSRKCGAC	PA0155_GSTTTCGA	0.230413
PA3215_WWWAAATAHTWKWWAAWHA	PA0155_GSTTTCGA	0.304574
PA3220_TTTWTADTCMTWTBBWTATA	PA0155_GSTTTCGA	0.457423
PA3260_TTWTTAWTWTYTDTT	PA0155_GSTTTCGA	0.484161
PA3420_TGGCCDBSNYGRWCCY	PA0155_GSTTTCGA	0.493285
PA3433_WYGMBSWTGNCGWTG	PA0155_GSTTTCGA	0.563807
PA3508_TTMAAAAWAAWAAWY	PA0155_GSTTTCGA	0.39802
PA3565_TTTTTATTTTHWMTW	PA0155_GSTTTCGA	0.54457
PA3587_KCRNSNYGYTCATS	PA0155_GSTTTCGA	0.539123
PA3604_TYSNSGDYGWYSTBG	PA0155_GSTTTCGA	0.390769
PA3699_DNAWYGAGAAH	PA0155_GSTTTCGA	0.391828
PA3776_TCGSCCWG	PA0155_GSTTTCGA	0.171116
PA3830_TBSWYGBCGRYCWKS	PA0155_GSTTTCGA	0.392339
PA3845_WWWAAHDDWTWTTTDYWWWW	PA0155_GSTTTCGA	0.250736
PA3927_CAWCGWSAWSRCSMTSDMCG	PA0155_GSTTTCGA	0.542652
PA3965_WHCGAAAS	PA0155_GSTTTCGA	0.985012
PA3973_CVWCGSCGASCWGRYCBDCR	PA0155_GSTTTCGA	0.422011
PA4070_AWDRMAWAWDAAAAA	PA0155_GSTTTCGA	0.502396
PA4094_CSAGCAGCAGS	PA0155_GSTTTCGA	0.231703
PA4145_TKAWTYAAAAABAWTWWTT	PA0155_GSTTTCGA	0.445083
PA4157_YSDBGNYSAKCAGSWYGA	PA0155_GSTTTCGA	0.363934
PA4165_YSKYSTYGVYCAKSWHGBGS	PA0155_GSTTTCGA	0.502599
PA0034_CWKGNSSWSCWMGYSSTHGA	PA0163_WYGTCGVYGANCWSS	0.564718
PA0056_TYSRCSHGSDCCDBS	PA0163_WYGTCGVYGANCWSS	0.562218
PA0155_GSTTTCGA	PA0163_WYGTCGVYGANCWSS	0.414612
PA0167_ARSAKSADCAGGWHG	PA0163_WYGTCGVYGANCWSS	0.552072
PA0207_ARAAAAAAWYTTTGA	PA0163_WYGTCGVYGANCWSS	0.498934
PA0217_TMAWHWATAWRAAYAADHAA	PA0163_WYGTCGVYGANCWSS	0.249007
PA0218_CTGCTCGSCGH	PA0163_WYGTCGVYGANCWSS	0.774436
PA0233_YCCTGSTGSTGATCS	PA0163_WYGTCGVYGANCWSS	0.740753
PA0243_MCSVACCAGKTCGWYCABS	PA0163_WYGTCGVYGANCWSS	0.463258
PA0279_GCTCTACCAACTGAGCTAY	PA0163_WYGTCGVYGANCWSS	0.466401
PA0306_WTTGAAAATMAATA	PA0163_WYGTCGVYGANCWSS	0.23411
PA0367_TGAAYRSCDTTYNS	PA0163_WYGTCGVYGANCWSS	0.514443
PA0403_TATAATSNSCGSYTTTHTTB	PA0163_WYGTCGVYGANCWSS	0.407869
PA0448_WGSTGCTS	PA0163_WYGTCGVYGANCWSS	0.704183
PA0475_SCTCGNCGDYSWYSTBGTCG	PA0163_WYGTCGVYGANCWSS	0.867951
PA0527_WDWWWAWYYTYTAMWWRMAW	PA0163_WYGTCGVYGANCWSS	0.128206
PA0533_CTGSTSGVCVWSGBC	PA0163_WYGTCGVYGANCWSS	0.542574
PA0601_CCAGCRCCWGS	PA0163_WYGTCGVYGANCWSS	0.52364
PA0701_AATAVAAAATAAWWA	PA0163_WYGTCGVYGANCWSS	0.20695
PA0756_MTSGBCCWGKKCCWGCAGGW	PA0163_WYGTCGVYGANCWSS	0.541893
PA0797_TGSYGSCGSTGVWSG	PA0163_WYGTCGVYGANCWSS	0.602895
PA0815_SNCSWYCAGCASSDCGRTSW	PA0163_WYGTCGVYGANCWSS	0.585787
PA0816_MTWRWTATTTTTWWTBWATT	PA0163_WYGTCGVYGANCWSS	0.189506
PA0831_TGGCCGRVHWSGACC	PA0163_WYGTCGVYGANCWSS	0.633582
PA0873_WAANWWTDMAHAAAAMAAWT	PA0163_WYGTCGVYGANCWSS	0.0957648
PA0876_RWAWNAAWAAATWMWWAAWA	PA0163_WYGTCGVYGANCWSS	0.0729568
PA0893_GCGACATC	PA0163_WYGTCGVYGANCWSS	0.855109
PA0942_WSCGSRTCGACASCR	PA0163_WYGTCGVYGANCWSS	0.522779
PA1015_CSBGAATGSCRTTCA	PA0163_WYGTCGVYGANCWSS	0.46328
PA1136_AWTAAAAAWAAWTAWTHAWW	PA0163_WYGTCGVYGANCWSS	0.0971363
PA1157_WATDTTTTTTATWKATWTTT	PA0163_WYGTCGVYGANCWSS	0.224832
PA1182_SHSSHGSTGMTCGVC	PA0163_WYGTCGVYGANCWSS	0.754259
PA1184_WTWTTTTTWATTHATWKTTW	PA0163_WYGTCGVYGANCWSS	0.14983
PA1229_SWYGDYCWYGBCGRT	PA0163_WYGTCGVYGANCWSS	0.667032
PA1261_AAWAVAAWWTAAAAA	PA0163_WYGTCGVYGANCWSS	0.154371
PA1283_WWWWWTGWATAAAAAHWWTW	PA0163_WYGTCGVYGANCWSS	0.0950548
PA1309_TYGKCSWKGKYSWYSASSDY	PA0163_WYGTCGVYGANCWSS	0.523797
PA1347_CRNCRVCWTCRHCR	PA0163_WYGTCGVYGANCWSS	0.824444
PA1403_AHCWACRRCRWCAMC	PA0163_WYGTCGVYGANCWSS	0.506961
PA1504_SCAGGAHGVCCAGGA	PA0163_WYGTCGVYGANCWSS	0.430682
PA1653_RAVHWSGTCAASCTG	PA0163_WYGTCGVYGANCWSS	0.589714
PA1759_AATARAWAWDAAWAA	PA0163_WYGTCGVYGANCWSS	0.186828
PA1836_SWSGTMGAYSWBSDY	PA0163_WYGTCGVYGANCWSS	0.603595
PA1853_SSANSRCCWSGVYGA	PA0163_WYGTCGVYGANCWSS	0.518374
PA1859_TTTTTRTTWTTWATT	PA0163_WYGTCGVYGANCWSS	0.154879
PA1978_TTGNYGWYCWBGHCG	PA0163_WYGTCGVYGANCWSS	0.62879
PA1998_TGCTCGVC	PA0163_WYGTCGVYGANCWSS	0.72875
PA2010_CTSCTCGSCGNSSNS	PA0163_WYGTCGVYGANCWSS	0.689021
PA2032_SWSGATCWGGYCGANCAGSH	PA0163_WYGTCGVYGANCWSS	0.624175
PA2047_YGAKCAHCRSCAGSR	PA0163_WYGTCGVYGANCWSS	0.720313
PA2056_YCRWSSWGDWCRMCS	PA0163_WYGTCGVYGANCWSS	0.578472
PA2096_MWGGHCRACDHCMWS	PA0163_WYGTCGVYGANCWSS	0.604364
PA2123_GRCCKCGTYGATSRCCAYST	PA0163_WYGTCGVYGANCWSS	0.498135
PA2246_WSCBSSASYTCGMCSAS	PA0163_WYGTCGVYGANCWSS	0.698601
PA2270_WAWYCWAWWHWTYHKYAAAW	PA0163_WYGTCGVYGANCWSS	0.169148
PA2276_WCSTBCTYGADSTYSWYS	PA0163_WYGTCGVYGANCWSS	0.654502
PA2281_TTGDCCWTGTMGADG	PA0163_WYGTCGVYGANCWSS	0.622403
PA2299_CWGGTMGWHCAKGTC	PA0163_WYGTCGVYGANCWSS	0.475214
PA2417_DCGSCGARCAG	PA0163_WYGTCGVYGANCWSS	0.789722
PA2447_WSGNCRMSSWSNYC	PA0163_WYGTCGVYGANCWSS	0.818931
PA2449_HTTMWTWWWTDTTHBTTRTT	PA0163_WYGTCGVYGANCWSS	0.099594
PA2488_WWWAACWTTKAWTWVAAWAT	PA0163_WYGTCGVYGANCWSS	0.112824
PA2547_TCNNCDVCMHSRHCDDCGSC	PA0163_WYGTCGVYGANCWSS	0.679883
PA2551_GAHGRTCRSCA	PA0163_WYGTCGVYGANCWSS	0.588155
PA2556_VTGAKCRNCYHGGACAAS	PA0163_WYGTCGVYGANCWSS	0.559355
PA2601_HCSAGCAGGNYCWGG	PA0163_WYGTCGVYGANCWSS	0.569333
PA2692_WAAAWATDAWTWAARAAWWT	PA0163_WYGTCGVYGANCWSS	0.085429
PA2696_WGRTCWTCGVC	PA0163_WYGTCGVYGANCWSS	0.636205
PA2704_TGGCCDBSBCGATCC	PA0163_WYGTCGVYGANCWSS	0.442835
PA2718_WWWADATNYHAWWWAWDMAT	PA0163_WYGTCGVYGANCWSS	0.0292893
PA2766_ATDNATTWWDARMATWTWWW	PA0163_WYGTCGVYGANCWSS	0.138759
PA2848_CTGHTSDDCRHCVHS	PA0163_WYGTCGVYGANCWSS	0.702125
PA2917_TSRASGAMVWGBYSRWGSMG	PA0163_WYGTCGVYGANCWSS	0.683254
PA2930_WATAGGRMAATTCCYAWWKW	PA0163_WYGTCGVYGANCWSS	0.201055
PA2957_TCVASCAGTTC	PA0163_WYGTCGVYGANCWSS	0.754723
PA3027_AATDAAAAANAATAA	PA0163_WYGTCGVYGANCWSS	0.144542
PA3045_STTGKYGSCGDTGABGTWGT	PA0163_WYGTCGVYGANCWSS	0.548434
PA3094_BSBSCTGBTCGAYCTSSWYG	PA0163_WYGTCGVYGANCWSS	0.626984
PA3122_NGGAATRS	PA0163_WYGTCGVYGANCWSS	0.293268
PA3124_CSATGMYNHSYTGGAATDC	PA0163_WYGTCGVYGANCWSS	0.426033
PA3174_TTGMMCNRSRKCGAC	PA0163_WYGTCGVYGANCWSS	0.570073
PA3215_WWWAAATAHTWKWWAAWHA	PA0163_WYGTCGVYGANCWSS	0.0525129
PA3220_TTTWTADTCMTWTBBWTATA	PA0163_WYGTCGVYGANCWSS	0.102859
PA3260_TTWTTAWTWTYTDTT	PA0163_WYGTCGVYGANCWSS	0.123664
PA3420_TGGCCDBSNYGRWCCY	PA0163_WYGTCGVYGANCWSS	0.420861
PA3433_WYGMBSWTGNCGWTG	PA0163_WYGTCGVYGANCWSS	0.689999
PA3508_TTMAAAAWAAWAAWY	PA0163_WYGTCGVYGANCWSS	0.209626
PA3565_TTTTTATTTTHWMTW	PA0163_WYGTCGVYGANCWSS	0.10934
PA3587_KCRNSNYGYTCATS	PA0163_WYGTCGVYGANCWSS	0.468582
PA3604_TYSNSGDYGWYSTBG	PA0163_WYGTCGVYGANCWSS	0.676066
PA3699_DNAWYGAGAAH	PA0163_WYGTCGVYGANCWSS	0.282905
PA3776_TCGSCCWG	PA0163_WYGTCGVYGANCWSS	0.725619
PA3830_TBSWYGBCGRYCWKS	PA0163_WYGTCGVYGANCWSS	0.723542
PA3845_WWWAAHDDWTWTTTDYWWWW	PA0163_WYGTCGVYGANCWSS	0.109947
PA3927_CAWCGWSAWSRCSMTSDMCG	PA0163_WYGTCGVYGANCWSS	0.59318
PA3965_WHCGAAAS	PA0163_WYGTCGVYGANCWSS	0.290365
PA3973_CVWCGSCGASCWGRYCBDCR	PA0163_WYGTCGVYGANCWSS	0.628918
PA4070_AWDRMAWAWDAAAAA	PA0163_WYGTCGVYGANCWSS	0.197706
PA4094_CSAGCAGCAGS	PA0163_WYGTCGVYGANCWSS	0.609601
PA4145_TKAWTYAAAAABAWTWWTT	PA0163_WYGTCGVYGANCWSS	0.238269
PA4157_YSDBGNYSAKCAGSWYGA	PA0163_WYGTCGVYGANCWSS	0.743999
PA4165_YSKYSTYGVYCAKSWHGBGS	PA0163_WYGTCGVYGANCWSS	0.690536
PA0034_CWKGNSSWSCWMGYSSTHGA	PA0167_ARSAKSADCAGGWHG	0.484143
PA0056_TYSRCSHGSDCCDBS	PA0167_ARSAKSADCAGGWHG	0.551111
PA0155_GSTTTCGA	PA0167_ARSAKSADCAGGWHG	0.322814
PA0163_WYGTCGVYGANCWSS	PA0167_ARSAKSADCAGGWHG	0.552072
PA0207_ARAAAAAAWYTTTGA	PA0167_ARSAKSADCAGGWHG	0.24287
PA0217_TMAWHWATAWRAAYAADHAA	PA0167_ARSAKSADCAGGWHG	0.31085
PA0218_CTGCTCGSCGH	PA0167_ARSAKSADCAGGWHG	0.472324
PA0233_YCCTGSTGSTGATCS	PA0167_ARSAKSADCAGGWHG	0.788566
PA0243_MCSVACCAGKTCGWYCABS	PA0167_ARSAKSADCAGGWHG	0.410772
PA0279_GCTCTACCAACTGAGCTAY	PA0167_ARSAKSADCAGGWHG	0.337416
PA0306_WTTGAAAATMAATA	PA0167_ARSAKSADCAGGWHG	0.252147
PA0367_TGAAYRSCDTTYNS	PA0167_ARSAKSADCAGGWHG	0.502845
PA0403_TATAATSNSCGSYTTTHTTB	PA0167_ARSAKSADCAGGWHG	0.248866
PA0448_WGSTGCTS	PA0167_ARSAKSADCAGGWHG	0.699555
PA0475_SCTCGNCGDYSWYSTBGTCG	PA0167_ARSAKSADCAGGWHG	0.449173
PA0527_WDWWWAWYYTYTAMWWRMAW	PA0167_ARSAKSADCAGGWHG	0.215009
PA0533_CTGSTSGVCVWSGBC	PA0167_ARSAKSADCAGGWHG	0.473929
PA0601_CCAGCRCCWGS	PA0167_ARSAKSADCAGGWHG	0.593291
PA0701_AATAVAAAATAAWWA	PA0167_ARSAKSADCAGGWHG	0.313744
PA0756_MTSGBCCWGKKCCWGCAGGW	PA0167_ARSAKSADCAGGWHG	0.648024
PA0797_TGSYGSCGSTGVWSG	PA0167_ARSAKSADCAGGWHG	0.557938
PA0815_SNCSWYCAGCASSDCGRTSW	PA0167_ARSAKSADCAGGWHG	0.597601
PA0816_MTWRWTATTTTTWWTBWATT	PA0167_ARSAKSADCAGGWHG	0.264416
PA0831_TGGCCGRVHWSGACC	PA0167_ARSAKSADCAGGWHG	0.401848
PA0873_WAANWWTDMAHAAAAMAAWT	PA0167_ARSAKSADCAGGWHG	0.170868
PA0876_RWAWNAAWAAATWMWWAAWA	PA0167_ARSAKSADCAGGWHG	0.138871
PA0893_GCGACATC	PA0167_ARSAKSADCAGGWHG	0.482579
PA0942_WSCGSRTCGACASCR	PA0167_ARSAKSADCAGGWHG	0.449621
PA1015_CSBGAATGSCRTTCA	PA0167_ARSAKSADCAGGWHG	0.389913
PA1136_AWTAAAAAWAAWTAWTHAWW	PA0167_ARSAKSADCAGGWHG	0.147846
PA1157_WATDTTTTTTATWKATWTTT	PA0167_ARSAKSADCAGGWHG	0.155048
PA1182_SHSSHGSTGMTCGVC	PA0167_ARSAKSADCAGGWHG	0.611215
PA1184_WTWTTTTTWATTHATWKTTW	PA0167_ARSAKSADCAGGWHG	0.20609
PA1229_SWYGDYCWYGBCGRT	PA0167_ARSAKSADCAGGWHG	0.447839
PA1261_AAWAVAAWWTAAAAA	PA0167_ARSAKSADCAGGWHG	0.323498
PA1283_WWWWWTGWATAAAAAHWWTW	PA0167_ARSAKSADCAGGWHG	0.247525
PA1309_TYGKCSWKGKYSWYSASSDY	PA0167_ARSAKSADCAGGWHG	0.431025
PA1347_CRNCRVCWTCRHCR	PA0167_ARSAKSADCAGGWHG	0.543719
PA1403_AHCWACRRCRWCAMC	PA0167_ARSAKSADCAGGWHG	0.517198
PA1504_SCAGGAHGVCCAGGA	PA0167_ARSAKSADCAGGWHG	0.663025
PA1653_RAVHWSGTCAASCTG	PA0167_ARSAKSADCAGGWHG	0.843437
PA1759_AATARAWAWDAAWAA	PA0167_ARSAKSADCAGGWHG	0.280846
PA1836_SWSGTMGAYSWBSDY	PA0167_ARSAKSADCAGGWHG	0.751178
PA1853_SSANSRCCWSGVYGA	PA0167_ARSAKSADCAGGWHG	0.616848
PA1859_TTTTTRTTWTTWATT	PA0167_ARSAKSADCAGGWHG	0.237927
PA1978_TTGNYGWYCWBGHCG	PA0167_ARSAKSADCAGGWHG	0.433239
PA1998_TGCTCGVC	PA0167_ARSAKSADCAGGWHG	0.350929
PA2010_CTSCTCGSCGNSSNS	PA0167_ARSAKSADCAGGWHG	0.597051
PA2032_SWSGATCWGGYCGANCAGSH	PA0167_ARSAKSADCAGGWHG	0.765213
PA2047_YGAKCAHCRSCAGSR	PA0167_ARSAKSADCAGGWHG	0.749769
PA2056_YCRWSSWGDWCRMCS	PA0167_ARSAKSADCAGGWHG	0.764112
PA2096_MWGGHCRACDHCMWS	PA0167_ARSAKSADCAGGWHG	0.818425
PA2123_GRCCKCGTYGATSRCCAYST	PA0167_ARSAKSADCAGGWHG	0.527621
PA2246_WSCBSSASYTCGMCSAS	PA0167_ARSAKSADCAGGWHG	0.519875
PA2270_WAWYCWAWWHWTYHKYAAAW	PA0167_ARSAKSADCAGGWHG	0.27073
PA2276_WCSTBCTYGADSTYSWYS	PA0167_ARSAKSADCAGGWHG	0.726522
PA2281_TTGDCCWTGTMGADG	PA0167_ARSAKSADCAGGWHG	0.343902
PA2299_CWGGTMGWHCAKGTC	PA0167_ARSAKSADCAGGWHG	0.777675
PA2417_DCGSCGARCAG	PA0167_ARSAKSADCAGGWHG	0.500459
PA2447_WSGNCRMSSWSNYC	PA0167_ARSAKSADCAGGWHG	0.774809
PA2449_HTTMWTWWWTDTTHBTTRTT	PA0167_ARSAKSADCAGGWHG	0.261639
PA2488_WWWAACWTTKAWTWVAAWAT	PA0167_ARSAKSADCAGGWHG	0.301382
PA2547_TCNNCDVCMHSRHCDDCGSC	PA0167_ARSAKSADCAGGWHG	0.460814
PA2551_GAHGRTCRSCA	PA0167_ARSAKSADCAGGWHG	0.478923
PA2556_VTGAKCRNCYHGGACAAS	PA0167_ARSAKSADCAGGWHG	0.455301
PA2601_HCSAGCAGGNYCWGG	PA0167_ARSAKSADCAGGWHG	0.700672
PA2692_WAAAWATDAWTWAARAAWWT	PA0167_ARSAKSADCAGGWHG	0.207161
PA2696_WGRTCWTCGVC	PA0167_ARSAKSADCAGGWHG	0.37875
PA2704_TGGCCDBSBCGATCC	PA0167_ARSAKSADCAGGWHG	0.483117
PA2718_WWWADATNYHAWWWAWDMAT	PA0167_ARSAKSADCAGGWHG	0.241553
PA2766_ATDNATTWWDARMATWTWWW	PA0167_ARSAKSADCAGGWHG	0.285831
PA2848_CTGHTSDDCRHCVHS	PA0167_ARSAKSADCAGGWHG	0.691522
PA2917_TSRASGAMVWGBYSRWGSMG	PA0167_ARSAKSADCAGGWHG	0.556155
PA2930_WATAGGRMAATTCCYAWWKW	PA0167_ARSAKSADCAGGWHG	0.326981
PA2957_TCVASCAGTTC	PA0167_ARSAKSADCAGGWHG	0.516023
PA3027_AATDAAAAANAATAA	PA0167_ARSAKSADCAGGWHG	0.273212
PA3045_STTGKYGSCGDTGABGTWGT	PA0167_ARSAKSADCAGGWHG	0.409566
PA3094_BSBSCTGBTCGAYCTSSWYG	PA0167_ARSAKSADCAGGWHG	0.570099
PA3122_NGGAATRS	PA0167_ARSAKSADCAGGWHG	0.504899
PA3124_CSATGMYNHSYTGGAATDC	PA0167_ARSAKSADCAGGWHG	0.538269
PA3174_TTGMMCNRSRKCGAC	PA0167_ARSAKSADCAGGWHG	0.593904
PA3215_WWWAAATAHTWKWWAAWHA	PA0167_ARSAKSADCAGGWHG	0.211222
PA3220_TTTWTADTCMTWTBBWTATA	PA0167_ARSAKSADCAGGWHG	0.26259
PA3260_TTWTTAWTWTYTDTT	PA0167_ARSAKSADCAGGWHG	0.244518
PA3420_TGGCCDBSNYGRWCCY	PA0167_ARSAKSADCAGGWHG	0.638405
PA3433_WYGMBSWTGNCGWTG	PA0167_ARSAKSADCAGGWHG	0.546595
PA3508_TTMAAAAWAAWAAWY	PA0167_ARSAKSADCAGGWHG	0.308401
PA3565_TTTTTATTTTHWMTW	PA0167_ARSAKSADCAGGWHG	0.278139
PA3587_KCRNSNYGYTCATS	PA0167_ARSAKSADCAGGWHG	0.732536
PA3604_TYSNSGDYGWYSTBG	PA0167_ARSAKSADCAGGWHG	0.540452
PA3699_DNAWYGAGAAH	PA0167_ARSAKSADCAGGWHG	0.288242
PA3776_TCGSCCWG	PA0167_ARSAKSADCAGGWHG	0.456643
PA3830_TBSWYGBCGRYCWKS	PA0167_ARSAKSADCAGGWHG	0.59047
PA3845_WWWAAHDDWTWTTTDYWWWW	PA0167_ARSAKSADCAGGWHG	0.257697
PA3927_CAWCGWSAWSRCSMTSDMCG	PA0167_ARSAKSADCAGGWHG	0.534385
PA3965_WHCGAAAS	PA0167_ARSAKSADCAGGWHG	0.361185
PA3973_CVWCGSCGASCWGRYCBDCR	PA0167_ARSAKSADCAGGWHG	0.329962
PA4070_AWDRMAWAWDAAAAA	PA0167_ARSAKSADCAGGWHG	0.245071
PA4094_CSAGCAGCAGS	PA0167_ARSAKSADCAGGWHG	0.840479
PA4145_TKAWTYAAAAABAWTWWTT	PA0167_ARSAKSADCAGGWHG	0.278732
PA4157_YSDBGNYSAKCAGSWYGA	PA0167_ARSAKSADCAGGWHG	0.658484
PA4165_YSKYSTYGVYCAKSWHGBGS	PA0167_ARSAKSADCAGGWHG	0.410067
PA0034_CWKGNSSWSCWMGYSSTHGA	PA0207_ARAAAAAAWYTTTGA	0.319991
PA0056_TYSRCSHGSDCCDBS	PA0207_ARAAAAAAWYTTTGA	0.258243
PA0155_GSTTTCGA	PA0207_ARAAAAAAWYTTTGA	0.395649
PA0163_WYGTCGVYGANCWSS	PA0207_ARAAAAAAWYTTTGA	0.498934
PA0167_ARSAKSADCAGGWHG	PA0207_ARAAAAAAWYTTTGA	0.24287
PA0217_TMAWHWATAWRAAYAADHAA	PA0207_ARAAAAAAWYTTTGA	0.693797
PA0218_CTGCTCGSCGH	PA0207_ARAAAAAAWYTTTGA	0.243267
PA0233_YCCTGSTGSTGATCS	PA0207_ARAAAAAAWYTTTGA	0.267081
PA0243_MCSVACCAGKTCGWYCABS	PA0207_ARAAAAAAWYTTTGA	0.183071
PA0279_GCTCTACCAACTGAGCTAY	PA0207_ARAAAAAAWYTTTGA	0.312192
PA0306_WTTGAAAATMAATA	PA0207_ARAAAAAAWYTTTGA	0.712126
PA0367_TGAAYRSCDTTYNS	PA0207_ARAAAAAAWYTTTGA	0.291588
PA0403_TATAATSNSCGSYTTTHTTB	PA0207_ARAAAAAAWYTTTGA	0.42065
PA0448_WGSTGCTS	PA0207_ARAAAAAAWYTTTGA	0.413309
PA0475_SCTCGNCGDYSWYSTBGTCG	PA0207_ARAAAAAAWYTTTGA	0.177428
PA0527_WDWWWAWYYTYTAMWWRMAW	PA0207_ARAAAAAAWYTTTGA	0.784905
PA0533_CTGSTSGVCVWSGBC	PA0207_ARAAAAAAWYTTTGA	0.0959046
PA0601_CCAGCRCCWGS	PA0207_ARAAAAAAWYTTTGA	0.0686145
PA0701_AATAVAAAATAAWWA	PA0207_ARAAAAAAWYTTTGA	0.688575
PA0756_MTSGBCCWGKKCCWGCAGGW	PA0207_ARAAAAAAWYTTTGA	0.261568
PA0797_TGSYGSCGSTGVWSG	PA0207_ARAAAAAAWYTTTGA	0.232417
PA0815_SNCSWYCAGCASSDCGRTSW	PA0207_ARAAAAAAWYTTTGA	0.174748
PA0816_MTWRWTATTTTTWWTBWATT	PA0207_ARAAAAAAWYTTTGA	0.640998
PA0831_TGGCCGRVHWSGACC	PA0207_ARAAAAAAWYTTTGA	0.240654
PA0873_WAANWWTDMAHAAAAMAAWT	PA0207_ARAAAAAAWYTTTGA	0.813685
PA0876_RWAWNAAWAAATWMWWAAWA	PA0207_ARAAAAAAWYTTTGA	0.712012
PA0893_GCGACATC	PA0207_ARAAAAAAWYTTTGA	0.272439
PA0942_WSCGSRTCGACASCR	PA0207_ARAAAAAAWYTTTGA	0.197648
PA1015_CSBGAATGSCRTTCA	PA0207_ARAAAAAAWYTTTGA	0.195318
PA1136_AWTAAAAAWAAWTAWTHAWW	PA0207_ARAAAAAAWYTTTGA	0.613566
PA1157_WATDTTTTTTATWKATWTTT	PA0207_ARAAAAAAWYTTTGA	0.827029
PA1182_SHSSHGSTGMTCGVC	PA0207_ARAAAAAAWYTTTGA	0.0301337
PA1184_WTWTTTTTWATTHATWKTTW	PA0207_ARAAAAAAWYTTTGA	0.824994
PA1229_SWYGDYCWYGBCGRT	PA0207_ARAAAAAAWYTTTGA	0.247204
PA1261_AAWAVAAWWTAAAAA	PA0207_ARAAAAAAWYTTTGA	0.781394
PA1283_WWWWWTGWATAAAAAHWWTW	PA0207_ARAAAAAAWYTTTGA	0.825194
PA1309_TYGKCSWKGKYSWYSASSDY	PA0207_ARAAAAAAWYTTTGA	0.335366
PA1347_CRNCRVCWTCRHCR	PA0207_ARAAAAAAWYTTTGA	0.345071
PA1403_AHCWACRRCRWCAMC	PA0207_ARAAAAAAWYTTTGA	0.393109
PA1504_SCAGGAHGVCCAGGA	PA0207_ARAAAAAAWYTTTGA	0.244132
PA1653_RAVHWSGTCAASCTG	PA0207_ARAAAAAAWYTTTGA	0.303205
PA1759_AATARAWAWDAAWAA	PA0207_ARAAAAAAWYTTTGA	0.797749
PA1836_SWSGTMGAYSWBSDY	PA0207_ARAAAAAAWYTTTGA	0.273141
PA1853_SSANSRCCWSGVYGA	PA0207_ARAAAAAAWYTTTGA	0.0952352
PA1859_TTTTTRTTWTTWATT	PA0207_ARAAAAAAWYTTTGA	0.765418
PA1978_TTGNYGWYCWBGHCG	PA0207_ARAAAAAAWYTTTGA	0.441233
PA1998_TGCTCGVC	PA0207_ARAAAAAAWYTTTGA	0.30839
PA2010_CTSCTCGSCGNSSNS	PA0207_ARAAAAAAWYTTTGA	0.22418
PA2032_SWSGATCWGGYCGANCAGSH	PA0207_ARAAAAAAWYTTTGA	0.354103
PA2047_YGAKCAHCRSCAGSR	PA0207_ARAAAAAAWYTTTGA	0.186155
PA2056_YCRWSSWGDWCRMCS	PA0207_ARAAAAAAWYTTTGA	0.392175
PA2096_MWGGHCRACDHCMWS	PA0207_ARAAAAAAWYTTTGA	0.256179
PA2123_GRCCKCGTYGATSRCCAYST	PA0207_ARAAAAAAWYTTTGA	0.274248
PA2246_WSCBSSASYTCGMCSAS	PA0207_ARAAAAAAWYTTTGA	0.244379
PA2270_WAWYCWAWWHWTYHKYAAAW	PA0207_ARAAAAAAWYTTTGA	0.535273
PA2276_WCSTBCTYGADSTYSWYS	PA0207_ARAAAAAAWYTTTGA	0.313187
PA2281_TTGDCCWTGTMGADG	PA0207_ARAAAAAAWYTTTGA	0.592801
PA2299_CWGGTMGWHCAKGTC	PA0207_ARAAAAAAWYTTTGA	0.408896
PA2417_DCGSCGARCAG	PA0207_ARAAAAAAWYTTTGA	0.251438
PA2447_WSGNCRMSSWSNYC	PA0207_ARAAAAAAWYTTTGA	0.221161
PA2449_HTTMWTWWWTDTTHBTTRTT	PA0207_ARAAAAAAWYTTTGA	0.691189
PA2488_WWWAACWTTKAWTWVAAWAT	PA0207_ARAAAAAAWYTTTGA	0.68853
PA2547_TCNNCDVCMHSRHCDDCGSC	PA0207_ARAAAAAAWYTTTGA	0.207143
PA2551_GAHGRTCRSCA	PA0207_ARAAAAAAWYTTTGA	0.382304
PA2556_VTGAKCRNCYHGGACAAS	PA0207_ARAAAAAAWYTTTGA	0.326012
PA2601_HCSAGCAGGNYCWGG	PA0207_ARAAAAAAWYTTTGA	0.133407
PA2692_WAAAWATDAWTWAARAAWWT	PA0207_ARAAAAAAWYTTTGA	0.756118
PA2696_WGRTCWTCGVC	PA0207_ARAAAAAAWYTTTGA	0.497521
PA2704_TGGCCDBSBCGATCC	PA0207_ARAAAAAAWYTTTGA	0.184044
PA2718_WWWADATNYHAWWWAWDMAT	PA0207_ARAAAAAAWYTTTGA	0.596543
PA2766_ATDNATTWWDARMATWTWWW	PA0207_ARAAAAAAWYTTTGA	0.704172
PA2848_CTGHTSDDCRHCVHS	PA0207_ARAAAAAAWYTTTGA	0.25669
PA2917_TSRASGAMVWGBYSRWGSMG	PA0207_ARAAAAAAWYTTTGA	0.402262
PA2930_WATAGGRMAATTCCYAWWKW	PA0207_ARAAAAAAWYTTTGA	0.627489
PA2957_TCVASCAGTTC	PA0207_ARAAAAAAWYTTTGA	0.312863
PA3027_AATDAAAAANAATAA	PA0207_ARAAAAAAWYTTTGA	0.696552
PA3045_STTGKYGSCGDTGABGTWGT	PA0207_ARAAAAAAWYTTTGA	0.328383
PA3094_BSBSCTGBTCGAYCTSSWYG	PA0207_ARAAAAAAWYTTTGA	0.271793
PA3122_NGGAATRS	PA0207_ARAAAAAAWYTTTGA	0.33741
PA3124_CSATGMYNHSYTGGAATDC	PA0207_ARAAAAAAWYTTTGA	0.315219
PA3174_TTGMMCNRSRKCGAC	PA0207_ARAAAAAAWYTTTGA	0.289337
PA3215_WWWAAATAHTWKWWAAWHA	PA0207_ARAAAAAAWYTTTGA	0.67954
PA3220_TTTWTADTCMTWTBBWTATA	PA0207_ARAAAAAAWYTTTGA	0.640826
PA3260_TTWTTAWTWTYTDTT	PA0207_ARAAAAAAWYTTTGA	0.731625
PA3420_TGGCCDBSNYGRWCCY	PA0207_ARAAAAAAWYTTTGA	0.142004
PA3433_WYGMBSWTGNCGWTG	PA0207_ARAAAAAAWYTTTGA	0.507163
PA3508_TTMAAAAWAAWAAWY	PA0207_ARAAAAAAWYTTTGA	0.669548
PA3565_TTTTTATTTTHWMTW	PA0207_ARAAAAAAWYTTTGA	0.755566
PA3587_KCRNSNYGYTCATS	PA0207_ARAAAAAAWYTTTGA	0.234802
PA3604_TYSNSGDYGWYSTBG	PA0207_ARAAAAAAWYTTTGA	0.396571
PA3699_DNAWYGAGAAH	PA0207_ARAAAAAAWYTTTGA	0.598067
PA3776_TCGSCCWG	PA0207_ARAAAAAAWYTTTGA	0.0781069
PA3830_TBSWYGBCGRYCWKS	PA0207_ARAAAAAAWYTTTGA	0.325067
PA3845_WWWAAHDDWTWTTTDYWWWW	PA0207_ARAAAAAAWYTTTGA	0.676211
PA3927_CAWCGWSAWSRCSMTSDMCG	PA0207_ARAAAAAAWYTTTGA	0.164375
PA3965_WHCGAAAS	PA0207_ARAAAAAAWYTTTGA	0.515636
PA3973_CVWCGSCGASCWGRYCBDCR	PA0207_ARAAAAAAWYTTTGA	0.164089
PA4070_AWDRMAWAWDAAAAA	PA0207_ARAAAAAAWYTTTGA	0.700747
PA4094_CSAGCAGCAGS	PA0207_ARAAAAAAWYTTTGA	0.310755
PA4145_TKAWTYAAAAABAWTWWTT	PA0207_ARAAAAAAWYTTTGA	0.647679
PA4157_YSDBGNYSAKCAGSWYGA	PA0207_ARAAAAAAWYTTTGA	0.373306
PA4165_YSKYSTYGVYCAKSWHGBGS	PA0207_ARAAAAAAWYTTTGA	0.229096
PA0034_CWKGNSSWSCWMGYSSTHGA	PA0217_TMAWHWATAWRAAYAADHAA	0.255172
PA0056_TYSRCSHGSDCCDBS	PA0217_TMAWHWATAWRAAYAADHAA	0.0546787
PA0155_GSTTTCGA	PA0217_TMAWHWATAWRAAYAADHAA	0.387412
PA0163_WYGTCGVYGANCWSS	PA0217_TMAWHWATAWRAAYAADHAA	0.249007
PA0167_ARSAKSADCAGGWHG	PA0217_TMAWHWATAWRAAYAADHAA	0.31085
PA0207_ARAAAAAAWYTTTGA	PA0217_TMAWHWATAWRAAYAADHAA	0.693797
PA0218_CTGCTCGSCGH	PA0217_TMAWHWATAWRAAYAADHAA	0.11303
PA0233_YCCTGSTGSTGATCS	PA0217_TMAWHWATAWRAAYAADHAA	0.245488
PA0243_MCSVACCAGKTCGWYCABS	PA0217_TMAWHWATAWRAAYAADHAA	0.246335
PA0279_GCTCTACCAACTGAGCTAY	PA0217_TMAWHWATAWRAAYAADHAA	0.377221
PA0306_WTTGAAAATMAATA	PA0217_TMAWHWATAWRAAYAADHAA	0.832624
PA0367_TGAAYRSCDTTYNS	PA0217_TMAWHWATAWRAAYAADHAA	0.297059
PA0403_TATAATSNSCGSYTTTHTTB	PA0217_TMAWHWATAWRAAYAADHAA	0.593046
PA0448_WGSTGCTS	PA0217_TMAWHWATAWRAAYAADHAA	0.236846
PA0475_SCTCGNCGDYSWYSTBGTCG	PA0217_TMAWHWATAWRAAYAADHAA	0.189331
PA0527_WDWWWAWYYTYTAMWWRMAW	PA0217_TMAWHWATAWRAAYAADHAA	0.626098
PA0533_CTGSTSGVCVWSGBC	PA0217_TMAWHWATAWRAAYAADHAA	0.0414986
PA0601_CCAGCRCCWGS	PA0217_TMAWHWATAWRAAYAADHAA	0.0599165
PA0701_AATAVAAAATAAWWA	PA0217_TMAWHWATAWRAAYAADHAA	0.879579
PA0756_MTSGBCCWGKKCCWGCAGGW	PA0217_TMAWHWATAWRAAYAADHAA	0.216985
PA0797_TGSYGSCGSTGVWSG	PA0217_TMAWHWATAWRAAYAADHAA	0.109704
PA0815_SNCSWYCAGCASSDCGRTSW	PA0217_TMAWHWATAWRAAYAADHAA	0.137297
PA0816_MTWRWTATTTTTWWTBWATT	PA0217_TMAWHWATAWRAAYAADHAA	0.688901
PA0831_TGGCCGRVHWSGACC	PA0217_TMAWHWATAWRAAYAADHAA	0.0708274
PA0873_WAANWWTDMAHAAAAMAAWT	PA0217_TMAWHWATAWRAAYAADHAA	0.733367
PA0876_RWAWNAAWAAATWMWWAAWA	PA0217_TMAWHWATAWRAAYAADHAA	0.763607
PA0893_GCGACATC	PA0217_TMAWHWATAWRAAYAADHAA	0.146213
PA0942_WSCGSRTCGACASCR	PA0217_TMAWHWATAWRAAYAADHAA	0.297817
PA1015_CSBGAATGSCRTTCA	PA0217_TMAWHWATAWRAAYAADHAA	0.302323
PA1136_AWTAAAAAWAAWTAWTHAWW	PA0217_TMAWHWATAWRAAYAADHAA	0.773945
PA1157_WATDTTTTTTATWKATWTTT	PA0217_TMAWHWATAWRAAYAADHAA	0.798804
PA1182_SHSSHGSTGMTCGVC	PA0217_TMAWHWATAWRAAYAADHAA	0.0256336
PA1184_WTWTTTTTWATTHATWKTTW	PA0217_TMAWHWATAWRAAYAADHAA	0.844514
PA1229_SWYGDYCWYGBCGRT	PA0217_TMAWHWATAWRAAYAADHAA	0.329334
PA1261_AAWAVAAWWTAAAAA	PA0217_TMAWHWATAWRAAYAADHAA	0.848649
PA1283_WWWWWTGWATAAAAAHWWTW	PA0217_TMAWHWATAWRAAYAADHAA	0.795964
PA1309_TYGKCSWKGKYSWYSASSDY	PA0217_TMAWHWATAWRAAYAADHAA	0.335094
PA1347_CRNCRVCWTCRHCR	PA0217_TMAWHWATAWRAAYAADHAA	0.267954
PA1403_AHCWACRRCRWCAMC	PA0217_TMAWHWATAWRAAYAADHAA	0.43201
PA1504_SCAGGAHGVCCAGGA	PA0217_TMAWHWATAWRAAYAADHAA	0.143885
PA1653_RAVHWSGTCAASCTG	PA0217_TMAWHWATAWRAAYAADHAA	0.317989
PA1759_AATARAWAWDAAWAA	PA0217_TMAWHWATAWRAAYAADHAA	0.863784
PA1836_SWSGTMGAYSWBSDY	PA0217_TMAWHWATAWRAAYAADHAA	0.20551
PA1853_SSANSRCCWSGVYGA	PA0217_TMAWHWATAWRAAYAADHAA	0.0276136
PA1859_TTTTTRTTWTTWATT	PA0217_TMAWHWATAWRAAYAADHAA	0.880359
PA1978_TTGNYGWYCWBGHCG	PA0217_TMAWHWATAWRAAYAADHAA	0.468204
PA1998_TGCTCGVC	PA0217_TMAWHWATAWRAAYAADHAA	0.131134
PA2010_CTSCTCGSCGNSSNS	PA0217_TMAWHWATAWRAAYAADHAA	0.0750138
PA2032_SWSGATCWGGYCGANCAGSH	PA0217_TMAWHWATAWRAAYAADHAA	0.122554
PA2047_YGAKCAHCRSCAGSR	PA0217_TMAWHWATAWRAAYAADHAA	0.281841
PA2056_YCRWSSWGDWCRMCS	PA0217_TMAWHWATAWRAAYAADHAA	0.316112
PA2096_MWGGHCRACDHCMWS	PA0217_TMAWHWATAWRAAYAADHAA	0.399133
PA2123_GRCCKCGTYGATSRCCAYST	PA0217_TMAWHWATAWRAAYAADHAA	0.184658
PA2246_WSCBSSASYTCGMCSAS	PA0217_TMAWHWATAWRAAYAADHAA	0.0821421
PA2270_WAWYCWAWWHWTYHKYAAAW	PA0217_TMAWHWATAWRAAYAADHAA	0.647532
PA2276_WCSTBCTYGADSTYSWYS	PA0217_TMAWHWATAWRAAYAADHAA	0.264418
PA2281_TTGDCCWTGTMGADG	PA0217_TMAWHWATAWRAAYAADHAA	0.249861
PA2299_CWGGTMGWHCAKGTC	PA0217_TMAWHWATAWRAAYAADHAA	0.280207
PA2417_DCGSCGARCAG	PA0217_TMAWHWATAWRAAYAADHAA	0.0965277
PA2447_WSGNCRMSSWSNYC	PA0217_TMAWHWATAWRAAYAADHAA	0.106342
PA2449_HTTMWTWWWTDTTHBTTRTT	PA0217_TMAWHWATAWRAAYAADHAA	0.810756
PA2488_WWWAACWTTKAWTWVAAWAT	PA0217_TMAWHWATAWRAAYAADHAA	0.765729
PA2547_TCNNCDVCMHSRHCDDCGSC	PA0217_TMAWHWATAWRAAYAADHAA	0.0841057
PA2551_GAHGRTCRSCA	PA0217_TMAWHWATAWRAAYAADHAA	0.330005
PA2556_VTGAKCRNCYHGGACAAS	PA0217_TMAWHWATAWRAAYAADHAA	0.370172
PA2601_HCSAGCAGGNYCWGG	PA0217_TMAWHWATAWRAAYAADHAA	0.185007
PA2692_WAAAWATDAWTWAARAAWWT	PA0217_TMAWHWATAWRAAYAADHAA	0.813674
PA2696_WGRTCWTCGVC	PA0217_TMAWHWATAWRAAYAADHAA	0.317943
PA2704_TGGCCDBSBCGATCC	PA0217_TMAWHWATAWRAAYAADHAA	0.122263
PA2718_WWWADATNYHAWWWAWDMAT	PA0217_TMAWHWATAWRAAYAADHAA	0.635985
PA2766_ATDNATTWWDARMATWTWWW	PA0217_TMAWHWATAWRAAYAADHAA	0.667932
PA2848_CTGHTSDDCRHCVHS	PA0217_TMAWHWATAWRAAYAADHAA	0.31611
PA2917_TSRASGAMVWGBYSRWGSMG	PA0217_TMAWHWATAWRAAYAADHAA	0.132949
PA2930_WATAGGRMAATTCCYAWWKW	PA0217_TMAWHWATAWRAAYAADHAA	0.545772
PA2957_TCVASCAGTTC	PA0217_TMAWHWATAWRAAYAADHAA	0.142492
PA3027_AATDAAAAANAATAA	PA0217_TMAWHWATAWRAAYAADHAA	0.80918
PA3045_STTGKYGSCGDTGABGTWGT	PA0217_TMAWHWATAWRAAYAADHAA	0.296558
PA3094_BSBSCTGBTCGAYCTSSWYG	PA0217_TMAWHWATAWRAAYAADHAA	0.1513
PA3122_NGGAATRS	PA0217_TMAWHWATAWRAAYAADHAA	0.477303
PA3124_CSATGMYNHSYTGGAATDC	PA0217_TMAWHWATAWRAAYAADHAA	0.286098
PA3174_TTGMMCNRSRKCGAC	PA0217_TMAWHWATAWRAAYAADHAA	0.2004
PA3215_WWWAAATAHTWKWWAAWHA	PA0217_TMAWHWATAWRAAYAADHAA	0.772687
PA3220_TTTWTADTCMTWTBBWTATA	PA0217_TMAWHWATAWRAAYAADHAA	0.650134
PA3260_TTWTTAWTWTYTDTT	PA0217_TMAWHWATAWRAAYAADHAA	0.87641
PA3420_TGGCCDBSNYGRWCCY	PA0217_TMAWHWATAWRAAYAADHAA	0.10878
PA3433_WYGMBSWTGNCGWTG	PA0217_TMAWHWATAWRAAYAADHAA	0.326821
PA3508_TTMAAAAWAAWAAWY	PA0217_TMAWHWATAWRAAYAADHAA	0.756944
PA3565_TTTTTATTTTHWMTW	PA0217_TMAWHWATAWRAAYAADHAA	0.832382
PA3587_KCRNSNYGYTCATS	PA0217_TMAWHWATAWRAAYAADHAA	0.364925
PA3604_TYSNSGDYGWYSTBG	PA0217_TMAWHWATAWRAAYAADHAA	0.239431
PA3699_DNAWYGAGAAH	PA0217_TMAWHWATAWRAAYAADHAA	0.606026
PA3776_TCGSCCWG	PA0217_TMAWHWATAWRAAYAADHAA	0.0598224
PA3830_TBSWYGBCGRYCWKS	PA0217_TMAWHWATAWRAAYAADHAA	0.245698
PA3845_WWWAAHDDWTWTTTDYWWWW	PA0217_TMAWHWATAWRAAYAADHAA	0.786292
PA3927_CAWCGWSAWSRCSMTSDMCG	PA0217_TMAWHWATAWRAAYAADHAA	0.258
PA3965_WHCGAAAS	PA0217_TMAWHWATAWRAAYAADHAA	0.393257
PA3973_CVWCGSCGASCWGRYCBDCR	PA0217_TMAWHWATAWRAAYAADHAA	0.0802574
PA4070_AWDRMAWAWDAAAAA	PA0217_TMAWHWATAWRAAYAADHAA	0.804057
PA4094_CSAGCAGCAGS	PA0217_TMAWHWATAWRAAYAADHAA	0.156403
PA4145_TKAWTYAAAAABAWTWWTT	PA0217_TMAWHWATAWRAAYAADHAA	0.826774
PA4157_YSDBGNYSAKCAGSWYGA	PA0217_TMAWHWATAWRAAYAADHAA	0.216865
PA4165_YSKYSTYGVYCAKSWHGBGS	PA0217_TMAWHWATAWRAAYAADHAA	0.24094
PA0034_CWKGNSSWSCWMGYSSTHGA	PA0218_CTGCTCGSCGH	0.638031
PA0056_TYSRCSHGSDCCDBS	PA0218_CTGCTCGSCGH	0.634084
PA0155_GSTTTCGA	PA0218_CTGCTCGSCGH	0.221399
PA0163_WYGTCGVYGANCWSS	PA0218_CTGCTCGSCGH	0.774436
PA0167_ARSAKSADCAGGWHG	PA0218_CTGCTCGSCGH	0.472324
PA0207_ARAAAAAAWYTTTGA	PA0218_CTGCTCGSCGH	0.243267
PA0217_TMAWHWATAWRAAYAADHAA	PA0218_CTGCTCGSCGH	0.11303
PA0233_YCCTGSTGSTGATCS	PA0218_CTGCTCGSCGH	0.801887
PA0243_MCSVACCAGKTCGWYCABS	PA0218_CTGCTCGSCGH	0.546007
PA0279_GCTCTACCAACTGAGCTAY	PA0218_CTGCTCGSCGH	0.583745
PA0306_WTTGAAAATMAATA	PA0218_CTGCTCGSCGH	0.117437
PA0367_TGAAYRSCDTTYNS	PA0218_CTGCTCGSCGH	0.503418
PA0403_TATAATSNSCGSYTTTHTTB	PA0218_CTGCTCGSCGH	0.301582
PA0448_WGSTGCTS	PA0218_CTGCTCGSCGH	0.808733
PA0475_SCTCGNCGDYSWYSTBGTCG	PA0218_CTGCTCGSCGH	0.685406
PA0527_WDWWWAWYYTYTAMWWRMAW	PA0218_CTGCTCGSCGH	0.177827
PA0533_CTGSTSGVCVWSGBC	PA0218_CTGCTCGSCGH	0.831919
PA0601_CCAGCRCCWGS	PA0218_CTGCTCGSCGH	0.58378
PA0701_AATAVAAAATAAWWA	PA0218_CTGCTCGSCGH	0.0242082
PA0756_MTSGBCCWGKKCCWGCAGGW	PA0218_CTGCTCGSCGH	0.655945
PA0797_TGSYGSCGSTGVWSG	PA0218_CTGCTCGSCGH	0.72885
PA0815_SNCSWYCAGCASSDCGRTSW	PA0218_CTGCTCGSCGH	0.615417
PA0816_MTWRWTATTTTTWWTBWATT	PA0218_CTGCTCGSCGH	0.0175565
PA0831_TGGCCGRVHWSGACC	PA0218_CTGCTCGSCGH	0.513607
PA0873_WAANWWTDMAHAAAAMAAWT	PA0218_CTGCTCGSCGH	0.143597
PA0876_RWAWNAAWAAATWMWWAAWA	PA0218_CTGCTCGSCGH	0.0657196
PA0893_GCGACATC	PA0218_CTGCTCGSCGH	0.271613
PA0942_WSCGSRTCGACASCR	PA0218_CTGCTCGSCGH	0.550425
PA1015_CSBGAATGSCRTTCA	PA0218_CTGCTCGSCGH	0.437625
PA1157_WATDTTTTTTATWKATWTTT	PA0218_CTGCTCGSCGH	0.0679173
PA1182_SHSSHGSTGMTCGVC	PA0218_CTGCTCGSCGH	0.915972
PA1184_WTWTTTTTWATTHATWKTTW	PA0218_CTGCTCGSCGH	0.225069
PA1229_SWYGDYCWYGBCGRT	PA0218_CTGCTCGSCGH	0.670768
PA1261_AAWAVAAWWTAAAAA	PA0218_CTGCTCGSCGH	0.16476
PA1283_WWWWWTGWATAAAAAHWWTW	PA0218_CTGCTCGSCGH	0.127278
PA1309_TYGKCSWKGKYSWYSASSDY	PA0218_CTGCTCGSCGH	0.763887
PA1347_CRNCRVCWTCRHCR	PA0218_CTGCTCGSCGH	0.779923
PA1403_AHCWACRRCRWCAMC	PA0218_CTGCTCGSCGH	0.303824
PA1504_SCAGGAHGVCCAGGA	PA0218_CTGCTCGSCGH	0.532221
PA1653_RAVHWSGTCAASCTG	PA0218_CTGCTCGSCGH	0.65194
PA1836_SWSGTMGAYSWBSDY	PA0218_CTGCTCGSCGH	0.615193
PA1853_SSANSRCCWSGVYGA	PA0218_CTGCTCGSCGH	0.727467
PA1859_TTTTTRTTWTTWATT	PA0218_CTGCTCGSCGH	0.0384909
PA1978_TTGNYGWYCWBGHCG	PA0218_CTGCTCGSCGH	0.694153
PA1998_TGCTCGVC	PA0218_CTGCTCGSCGH	0.983538
PA2010_CTSCTCGSCGNSSNS	PA0218_CTGCTCGSCGH	0.968551
PA2032_SWSGATCWGGYCGANCAGSH	PA0218_CTGCTCGSCGH	0.815716
PA2047_YGAKCAHCRSCAGSR	PA0218_CTGCTCGSCGH	0.71348
PA2056_YCRWSSWGDWCRMCS	PA0218_CTGCTCGSCGH	0.567992
PA2096_MWGGHCRACDHCMWS	PA0218_CTGCTCGSCGH	0.510184
PA2123_GRCCKCGTYGATSRCCAYST	PA0218_CTGCTCGSCGH	0.601797
PA2246_WSCBSSASYTCGMCSAS	PA0218_CTGCTCGSCGH	0.812901
PA2270_WAWYCWAWWHWTYHKYAAAW	PA0218_CTGCTCGSCGH	0.0812375
PA2276_WCSTBCTYGADSTYSWYS	PA0218_CTGCTCGSCGH	0.547235
PA2281_TTGDCCWTGTMGADG	PA0218_CTGCTCGSCGH	0.558368
PA2299_CWGGTMGWHCAKGTC	PA0218_CTGCTCGSCGH	0.559321
PA2417_DCGSCGARCAG	PA0218_CTGCTCGSCGH	0.990364
PA2447_WSGNCRMSSWSNYC	PA0218_CTGCTCGSCGH	0.859575
PA2449_HTTMWTWWWTDTTHBTTRTT	PA0218_CTGCTCGSCGH	0.0513653
PA2488_WWWAACWTTKAWTWVAAWAT	PA0218_CTGCTCGSCGH	0.115008
PA2547_TCNNCDVCMHSRHCDDCGSC	PA0218_CTGCTCGSCGH	0.461985
PA2551_GAHGRTCRSCA	PA0218_CTGCTCGSCGH	0.625348
PA2556_VTGAKCRNCYHGGACAAS	PA0218_CTGCTCGSCGH	0.579976
PA2601_HCSAGCAGGNYCWGG	PA0218_CTGCTCGSCGH	0.738665
PA2692_WAAAWATDAWTWAARAAWWT	PA0218_CTGCTCGSCGH	0.0998811
PA2696_WGRTCWTCGVC	PA0218_CTGCTCGSCGH	0.511019
PA2704_TGGCCDBSBCGATCC	PA0218_CTGCTCGSCGH	0.51025
PA2718_WWWADATNYHAWWWAWDMAT	PA0218_CTGCTCGSCGH	0.0465033
PA2766_ATDNATTWWDARMATWTWWW	PA0218_CTGCTCGSCGH	0.132451
PA2848_CTGHTSDDCRHCVHS	PA0218_CTGCTCGSCGH	0.772142
PA2917_TSRASGAMVWGBYSRWGSMG	PA0218_CTGCTCGSCGH	0.621766
PA2930_WATAGGRMAATTCCYAWWKW	PA0218_CTGCTCGSCGH	0.246018
PA2957_TCVASCAGTTC	PA0218_CTGCTCGSCGH	0.655973
PA3027_AATDAAAAANAATAA	PA0218_CTGCTCGSCGH	0.0990689
PA3045_STTGKYGSCGDTGABGTWGT	PA0218_CTGCTCGSCGH	0.491597
PA3094_BSBSCTGBTCGAYCTSSWYG	PA0218_CTGCTCGSCGH	0.798735
PA3122_NGGAATRS	PA0218_CTGCTCGSCGH	0.190618
PA3124_CSATGMYNHSYTGGAATDC	PA0218_CTGCTCGSCGH	0.391185
PA3174_TTGMMCNRSRKCGAC	PA0218_CTGCTCGSCGH	0.472642
PA3215_WWWAAATAHTWKWWAAWHA	PA0218_CTGCTCGSCGH	0.0426591
PA3220_TTTWTADTCMTWTBBWTATA	PA0218_CTGCTCGSCGH	0.115262
PA3420_TGGCCDBSNYGRWCCY	PA0218_CTGCTCGSCGH	0.468784
PA3433_WYGMBSWTGNCGWTG	PA0218_CTGCTCGSCGH	0.604422
PA3508_TTMAAAAWAAWAAWY	PA0218_CTGCTCGSCGH	0.0638912
PA3565_TTTTTATTTTHWMTW	PA0218_CTGCTCGSCGH	0.0180794
PA3587_KCRNSNYGYTCATS	PA0218_CTGCTCGSCGH	0.485934
PA3604_TYSNSGDYGWYSTBG	PA0218_CTGCTCGSCGH	0.515582
PA3699_DNAWYGAGAAH	PA0218_CTGCTCGSCGH	0.256045
PA3776_TCGSCCWG	PA0218_CTGCTCGSCGH	0.880836
PA3830_TBSWYGBCGRYCWKS	PA0218_CTGCTCGSCGH	0.667828
PA3845_WWWAAHDDWTWTTTDYWWWW	PA0218_CTGCTCGSCGH	0.0483213
PA3927_CAWCGWSAWSRCSMTSDMCG	PA0218_CTGCTCGSCGH	0.623634
PA3965_WHCGAAAS	PA0218_CTGCTCGSCGH	0.138635
PA3973_CVWCGSCGASCWGRYCBDCR	PA0218_CTGCTCGSCGH	0.81311
PA4070_AWDRMAWAWDAAAAA	PA0218_CTGCTCGSCGH	0.124023
PA4094_CSAGCAGCAGS	PA0218_CTGCTCGSCGH	0.835757
PA4145_TKAWTYAAAAABAWTWWTT	PA0218_CTGCTCGSCGH	0.113229
PA4157_YSDBGNYSAKCAGSWYGA	PA0218_CTGCTCGSCGH	0.771558
PA4165_YSKYSTYGVYCAKSWHGBGS	PA0218_CTGCTCGSCGH	0.645972
PA0034_CWKGNSSWSCWMGYSSTHGA	PA0233_YCCTGSTGSTGATCS	0.514524
PA0056_TYSRCSHGSDCCDBS	PA0233_YCCTGSTGSTGATCS	0.624483
PA0155_GSTTTCGA	PA0233_YCCTGSTGSTGATCS	0.424295
PA0163_WYGTCGVYGANCWSS	PA0233_YCCTGSTGSTGATCS	0.740753
PA0167_ARSAKSADCAGGWHG	PA0233_YCCTGSTGSTGATCS	0.788566
PA0207_ARAAAAAAWYTTTGA	PA0233_YCCTGSTGSTGATCS	0.267081
PA0217_TMAWHWATAWRAAYAADHAA	PA0233_YCCTGSTGSTGATCS	0.245488
PA0218_CTGCTCGSCGH	PA0233_YCCTGSTGSTGATCS	0.801887
PA0243_MCSVACCAGKTCGWYCABS	PA0233_YCCTGSTGSTGATCS	0.599453
PA0279_GCTCTACCAACTGAGCTAY	PA0233_YCCTGSTGSTGATCS	0.370055
PA0306_WTTGAAAATMAATA	PA0233_YCCTGSTGSTGATCS	0.197305
PA0367_TGAAYRSCDTTYNS	PA0233_YCCTGSTGSTGATCS	0.624708
PA0403_TATAATSNSCGSYTTTHTTB	PA0233_YCCTGSTGSTGATCS	0.301601
PA0448_WGSTGCTS	PA0233_YCCTGSTGSTGATCS	0.907079
PA0475_SCTCGNCGDYSWYSTBGTCG	PA0233_YCCTGSTGSTGATCS	0.541104
PA0527_WDWWWAWYYTYTAMWWRMAW	PA0233_YCCTGSTGSTGATCS	0.0742197
PA0533_CTGSTSGVCVWSGBC	PA0233_YCCTGSTGSTGATCS	0.744307
PA0601_CCAGCRCCWGS	PA0233_YCCTGSTGSTGATCS	0.7064
PA0701_AATAVAAAATAAWWA	PA0233_YCCTGSTGSTGATCS	0.286191
PA0756_MTSGBCCWGKKCCWGCAGGW	PA0233_YCCTGSTGSTGATCS	0.640572
PA0797_TGSYGSCGSTGVWSG	PA0233_YCCTGSTGSTGATCS	0.714079
PA0815_SNCSWYCAGCASSDCGRTSW	PA0233_YCCTGSTGSTGATCS	0.773366
PA0816_MTWRWTATTTTTWWTBWATT	PA0233_YCCTGSTGSTGATCS	0.11467
PA0831_TGGCCGRVHWSGACC	PA0233_YCCTGSTGSTGATCS	0.467012
PA0873_WAANWWTDMAHAAAAMAAWT	PA0233_YCCTGSTGSTGATCS	0.0560296
PA0876_RWAWNAAWAAATWMWWAAWA	PA0233_YCCTGSTGSTGATCS	0.0917978
PA0893_GCGACATC	PA0233_YCCTGSTGSTGATCS	0.324544
PA0942_WSCGSRTCGACASCR	PA0233_YCCTGSTGSTGATCS	0.611009
PA1015_CSBGAATGSCRTTCA	PA0233_YCCTGSTGSTGATCS	0.672642
PA1136_AWTAAAAAWAAWTAWTHAWW	PA0233_YCCTGSTGSTGATCS	0.0486204
PA1157_WATDTTTTTTATWKATWTTT	PA0233_YCCTGSTGSTGATCS	0.110337
PA1182_SHSSHGSTGMTCGVC	PA0233_YCCTGSTGSTGATCS	0.774923
PA1184_WTWTTTTTWATTHATWKTTW	PA0233_YCCTGSTGSTGATCS	0.235063
PA1229_SWYGDYCWYGBCGRT	PA0233_YCCTGSTGSTGATCS	0.445472
PA1261_AAWAVAAWWTAAAAA	PA0233_YCCTGSTGSTGATCS	0.244629
PA1283_WWWWWTGWATAAAAAHWWTW	PA0233_YCCTGSTGSTGATCS	0.113773
PA1309_TYGKCSWKGKYSWYSASSDY	PA0233_YCCTGSTGSTGATCS	0.445714
PA1347_CRNCRVCWTCRHCR	PA0233_YCCTGSTGSTGATCS	0.487777
PA1403_AHCWACRRCRWCAMC	PA0233_YCCTGSTGSTGATCS	0.523429
PA1504_SCAGGAHGVCCAGGA	PA0233_YCCTGSTGSTGATCS	0.880183
PA1653_RAVHWSGTCAASCTG	PA0233_YCCTGSTGSTGATCS	0.501671
PA1759_AATARAWAWDAAWAA	PA0233_YCCTGSTGSTGATCS	0.187629
PA1836_SWSGTMGAYSWBSDY	PA0233_YCCTGSTGSTGATCS	0.557046
PA1853_SSANSRCCWSGVYGA	PA0233_YCCTGSTGSTGATCS	0.790288
PA1859_TTTTTRTTWTTWATT	PA0233_YCCTGSTGSTGATCS	0.22398
PA1978_TTGNYGWYCWBGHCG	PA0233_YCCTGSTGSTGATCS	0.422885
PA1998_TGCTCGVC	PA0233_YCCTGSTGSTGATCS	0.804299
PA2010_CTSCTCGSCGNSSNS	PA0233_YCCTGSTGSTGATCS	0.811767
PA2032_SWSGATCWGGYCGANCAGSH	PA0233_YCCTGSTGSTGATCS	0.688945
PA2047_YGAKCAHCRSCAGSR	PA0233_YCCTGSTGSTGATCS	0.849073
PA2056_YCRWSSWGDWCRMCS	PA0233_YCCTGSTGSTGATCS	0.502555
PA2096_MWGGHCRACDHCMWS	PA0233_YCCTGSTGSTGATCS	0.569331
PA2123_GRCCKCGTYGATSRCCAYST	PA0233_YCCTGSTGSTGATCS	0.596495
PA2246_WSCBSSASYTCGMCSAS	PA0233_YCCTGSTGSTGATCS	0.615555
PA2270_WAWYCWAWWHWTYHKYAAAW	PA0233_YCCTGSTGSTGATCS	0.218532
PA2276_WCSTBCTYGADSTYSWYS	PA0233_YCCTGSTGSTGATCS	0.570677
PA2281_TTGDCCWTGTMGADG	PA0233_YCCTGSTGSTGATCS	0.38262
PA2299_CWGGTMGWHCAKGTC	PA0233_YCCTGSTGSTGATCS	0.586426
PA2417_DCGSCGARCAG	PA0233_YCCTGSTGSTGATCS	0.787863
PA2447_WSGNCRMSSWSNYC	PA0233_YCCTGSTGSTGATCS	0.39745
PA2449_HTTMWTWWWTDTTHBTTRTT	PA0233_YCCTGSTGSTGATCS	0.26548
PA2488_WWWAACWTTKAWTWVAAWAT	PA0233_YCCTGSTGSTGATCS	0.147884
PA2547_TCNNCDVCMHSRHCDDCGSC	PA0233_YCCTGSTGSTGATCS	0.462706
PA2551_GAHGRTCRSCA	PA0233_YCCTGSTGSTGATCS	0.822866
PA2556_VTGAKCRNCYHGGACAAS	PA0233_YCCTGSTGSTGATCS	0.742636
PA2601_HCSAGCAGGNYCWGG	PA0233_YCCTGSTGSTGATCS	0.666845
PA2692_WAAAWATDAWTWAARAAWWT	PA0233_YCCTGSTGSTGATCS	0.0705333
PA2696_WGRTCWTCGVC	PA0233_YCCTGSTGSTGATCS	0.466403
PA2704_TGGCCDBSBCGATCC	PA0233_YCCTGSTGSTGATCS	0.716443
PA2718_WWWADATNYHAWWWAWDMAT	PA0233_YCCTGSTGSTGATCS	0.0579923
PA2766_ATDNATTWWDARMATWTWWW	PA0233_YCCTGSTGSTGATCS	0.101747
PA2848_CTGHTSDDCRHCVHS	PA0233_YCCTGSTGSTGATCS	0.701796
PA2917_TSRASGAMVWGBYSRWGSMG	PA0233_YCCTGSTGSTGATCS	0.575949
PA2930_WATAGGRMAATTCCYAWWKW	PA0233_YCCTGSTGSTGATCS	0.424536
PA2957_TCVASCAGTTC	PA0233_YCCTGSTGSTGATCS	0.443205
PA3027_AATDAAAAANAATAA	PA0233_YCCTGSTGSTGATCS	0.234138
PA3045_STTGKYGSCGDTGABGTWGT	PA0233_YCCTGSTGSTGATCS	0.451966
PA3094_BSBSCTGBTCGAYCTSSWYG	PA0233_YCCTGSTGSTGATCS	0.531728
PA3122_NGGAATRS	PA0233_YCCTGSTGSTGATCS	0.421264
PA3124_CSATGMYNHSYTGGAATDC	PA0233_YCCTGSTGSTGATCS	0.498657
PA3174_TTGMMCNRSRKCGAC	PA0233_YCCTGSTGSTGATCS	0.349235
PA3215_WWWAAATAHTWKWWAAWHA	PA0233_YCCTGSTGSTGATCS	0.213625
PA3220_TTTWTADTCMTWTBBWTATA	PA0233_YCCTGSTGSTGATCS	0.201187
PA3260_TTWTTAWTWTYTDTT	PA0233_YCCTGSTGSTGATCS	0.223568
PA3420_TGGCCDBSNYGRWCCY	PA0233_YCCTGSTGSTGATCS	0.565463
PA3433_WYGMBSWTGNCGWTG	PA0233_YCCTGSTGSTGATCS	0.39691
PA3508_TTMAAAAWAAWAAWY	PA0233_YCCTGSTGSTGATCS	0.136717
PA3565_TTTTTATTTTHWMTW	PA0233_YCCTGSTGSTGATCS	0.141066
PA3587_KCRNSNYGYTCATS	PA0233_YCCTGSTGSTGATCS	0.477726
PA3604_TYSNSGDYGWYSTBG	PA0233_YCCTGSTGSTGATCS	0.556578
PA3699_DNAWYGAGAAH	PA0233_YCCTGSTGSTGATCS	0.429775
PA3776_TCGSCCWG	PA0233_YCCTGSTGSTGATCS	0.509542
PA3830_TBSWYGBCGRYCWKS	PA0233_YCCTGSTGSTGATCS	0.672498
PA3845_WWWAAHDDWTWTTTDYWWWW	PA0233_YCCTGSTGSTGATCS	0.108644
PA3927_CAWCGWSAWSRCSMTSDMCG	PA0233_YCCTGSTGSTGATCS	0.517569
PA3965_WHCGAAAS	PA0233_YCCTGSTGSTGATCS	0.381557
PA3973_CVWCGSCGASCWGRYCBDCR	PA0233_YCCTGSTGSTGATCS	0.531652
PA4070_AWDRMAWAWDAAAAA	PA0233_YCCTGSTGSTGATCS	0.13074
PA4094_CSAGCAGCAGS	PA0233_YCCTGSTGSTGATCS	0.752295
PA4145_TKAWTYAAAAABAWTWWTT	PA0233_YCCTGSTGSTGATCS	0.411016
PA4157_YSDBGNYSAKCAGSWYGA	PA0233_YCCTGSTGSTGATCS	0.667507
PA4165_YSKYSTYGVYCAKSWHGBGS	PA0233_YCCTGSTGSTGATCS	0.538629
PA0034_CWKGNSSWSCWMGYSSTHGA	PA0243_MCSVACCAGKTCGWYCABS	0.492448
PA0056_TYSRCSHGSDCCDBS	PA0243_MCSVACCAGKTCGWYCABS	0.706787
PA0155_GSTTTCGA	PA0243_MCSVACCAGKTCGWYCABS	0.494912
PA0163_WYGTCGVYGANCWSS	PA0243_MCSVACCAGKTCGWYCABS	0.463258
PA0167_ARSAKSADCAGGWHG	PA0243_MCSVACCAGKTCGWYCABS	0.410772
PA0207_ARAAAAAAWYTTTGA	PA0243_MCSVACCAGKTCGWYCABS	0.183071
PA0217_TMAWHWATAWRAAYAADHAA	PA0243_MCSVACCAGKTCGWYCABS	0.246335
PA0218_CTGCTCGSCGH	PA0243_MCSVACCAGKTCGWYCABS	0.546007
PA0233_YCCTGSTGSTGATCS	PA0243_MCSVACCAGKTCGWYCABS	0.599453
PA0279_GCTCTACCAACTGAGCTAY	PA0243_MCSVACCAGKTCGWYCABS	0.417051
PA0306_WTTGAAAATMAATA	PA0243_MCSVACCAGKTCGWYCABS	0.157185
PA0367_TGAAYRSCDTTYNS	PA0243_MCSVACCAGKTCGWYCABS	0.322142
PA0403_TATAATSNSCGSYTTTHTTB	PA0243_MCSVACCAGKTCGWYCABS	0.206728
PA0448_WGSTGCTS	PA0243_MCSVACCAGKTCGWYCABS	0.54978
PA0475_SCTCGNCGDYSWYSTBGTCG	PA0243_MCSVACCAGKTCGWYCABS	0.675045
PA0527_WDWWWAWYYTYTAMWWRMAW	PA0243_MCSVACCAGKTCGWYCABS	0.146562
PA0533_CTGSTSGVCVWSGBC	PA0243_MCSVACCAGKTCGWYCABS	0.578506
PA0601_CCAGCRCCWGS	PA0243_MCSVACCAGKTCGWYCABS	0.478818
PA0701_AATAVAAAATAAWWA	PA0243_MCSVACCAGKTCGWYCABS	0.197636
PA0756_MTSGBCCWGKKCCWGCAGGW	PA0243_MCSVACCAGKTCGWYCABS	0.525428
PA0797_TGSYGSCGSTGVWSG	PA0243_MCSVACCAGKTCGWYCABS	0.724173
PA0815_SNCSWYCAGCASSDCGRTSW	PA0243_MCSVACCAGKTCGWYCABS	0.538734
PA0816_MTWRWTATTTTTWWTBWATT	PA0243_MCSVACCAGKTCGWYCABS	0.227431
PA0831_TGGCCGRVHWSGACC	PA0243_MCSVACCAGKTCGWYCABS	0.475397
PA0873_WAANWWTDMAHAAAAMAAWT	PA0243_MCSVACCAGKTCGWYCABS	0.255696
PA0876_RWAWNAAWAAATWMWWAAWA	PA0243_MCSVACCAGKTCGWYCABS	0.138342
PA0893_GCGACATC	PA0243_MCSVACCAGKTCGWYCABS	0.388683
PA0942_WSCGSRTCGACASCR	PA0243_MCSVACCAGKTCGWYCABS	0.469182
PA1015_CSBGAATGSCRTTCA	PA0243_MCSVACCAGKTCGWYCABS	0.33085
PA1136_AWTAAAAAWAAWTAWTHAWW	PA0243_MCSVACCAGKTCGWYCABS	0.22301
PA1157_WATDTTTTTTATWKATWTTT	PA0243_MCSVACCAGKTCGWYCABS	0.170866
PA1182_SHSSHGSTGMTCGVC	PA0243_MCSVACCAGKTCGWYCABS	0.556792
PA1184_WTWTTTTTWATTHATWKTTW	PA0243_MCSVACCAGKTCGWYCABS	0.162143
PA1229_SWYGDYCWYGBCGRT	PA0243_MCSVACCAGKTCGWYCABS	0.498587
PA1261_AAWAVAAWWTAAAAA	PA0243_MCSVACCAGKTCGWYCABS	0.153314
PA1283_WWWWWTGWATAAAAAHWWTW	PA0243_MCSVACCAGKTCGWYCABS	0.130251
PA1309_TYGKCSWKGKYSWYSASSDY	PA0243_MCSVACCAGKTCGWYCABS	0.784812
PA1347_CRNCRVCWTCRHCR	PA0243_MCSVACCAGKTCGWYCABS	0.447737
PA1403_AHCWACRRCRWCAMC	PA0243_MCSVACCAGKTCGWYCABS	0.365749
PA1504_SCAGGAHGVCCAGGA	PA0243_MCSVACCAGKTCGWYCABS	0.695554
PA1653_RAVHWSGTCAASCTG	PA0243_MCSVACCAGKTCGWYCABS	0.578251
PA1759_AATARAWAWDAAWAA	PA0243_MCSVACCAGKTCGWYCABS	0.187998
PA1836_SWSGTMGAYSWBSDY	PA0243_MCSVACCAGKTCGWYCABS	0.597367
PA1853_SSANSRCCWSGVYGA	PA0243_MCSVACCAGKTCGWYCABS	0.642389
PA1859_TTTTTRTTWTTWATT	PA0243_MCSVACCAGKTCGWYCABS	0.235082
PA1978_TTGNYGWYCWBGHCG	PA0243_MCSVACCAGKTCGWYCABS	0.676105
PA1998_TGCTCGVC	PA0243_MCSVACCAGKTCGWYCABS	0.499948
PA2010_CTSCTCGSCGNSSNS	PA0243_MCSVACCAGKTCGWYCABS	0.553243
PA2032_SWSGATCWGGYCGANCAGSH	PA0243_MCSVACCAGKTCGWYCABS	0.552804
PA2047_YGAKCAHCRSCAGSR	PA0243_MCSVACCAGKTCGWYCABS	0.578537
PA2056_YCRWSSWGDWCRMCS	PA0243_MCSVACCAGKTCGWYCABS	0.619924
PA2096_MWGGHCRACDHCMWS	PA0243_MCSVACCAGKTCGWYCABS	0.497667
PA2123_GRCCKCGTYGATSRCCAYST	PA0243_MCSVACCAGKTCGWYCABS	0.43322
PA2246_WSCBSSASYTCGMCSAS	PA0243_MCSVACCAGKTCGWYCABS	0.521899
PA2270_WAWYCWAWWHWTYHKYAAAW	PA0243_MCSVACCAGKTCGWYCABS	0.226758
PA2276_WCSTBCTYGADSTYSWYS	PA0243_MCSVACCAGKTCGWYCABS	0.444041
PA2281_TTGDCCWTGTMGADG	PA0243_MCSVACCAGKTCGWYCABS	0.582917
PA2299_CWGGTMGWHCAKGTC	PA0243_MCSVACCAGKTCGWYCABS	0.721619
PA2417_DCGSCGARCAG	PA0243_MCSVACCAGKTCGWYCABS	0.553887
PA2447_WSGNCRMSSWSNYC	PA0243_MCSVACCAGKTCGWYCABS	0.459206
PA2449_HTTMWTWWWTDTTHBTTRTT	PA0243_MCSVACCAGKTCGWYCABS	0.0909443
PA2488_WWWAACWTTKAWTWVAAWAT	PA0243_MCSVACCAGKTCGWYCABS	0.178736
PA2547_TCNNCDVCMHSRHCDDCGSC	PA0243_MCSVACCAGKTCGWYCABS	0.399608
PA2551_GAHGRTCRSCA	PA0243_MCSVACCAGKTCGWYCABS	0.398594
PA2556_VTGAKCRNCYHGGACAAS	PA0243_MCSVACCAGKTCGWYCABS	0.600245
PA2601_HCSAGCAGGNYCWGG	PA0243_MCSVACCAGKTCGWYCABS	0.678836
PA2692_WAAAWATDAWTWAARAAWWT	PA0243_MCSVACCAGKTCGWYCABS	0.145328
PA2696_WGRTCWTCGVC	PA0243_MCSVACCAGKTCGWYCABS	0.403845
PA2704_TGGCCDBSBCGATCC	PA0243_MCSVACCAGKTCGWYCABS	0.585961
PA2718_WWWADATNYHAWWWAWDMAT	PA0243_MCSVACCAGKTCGWYCABS	0.127876
PA2766_ATDNATTWWDARMATWTWWW	PA0243_MCSVACCAGKTCGWYCABS	0.16235
PA2848_CTGHTSDDCRHCVHS	PA0243_MCSVACCAGKTCGWYCABS	0.583714
PA2917_TSRASGAMVWGBYSRWGSMG	PA0243_MCSVACCAGKTCGWYCABS	0.518149
PA2930_WATAGGRMAATTCCYAWWKW	PA0243_MCSVACCAGKTCGWYCABS	0.250578
PA2957_TCVASCAGTTC	PA0243_MCSVACCAGKTCGWYCABS	0.75499
PA3027_AATDAAAAANAATAA	PA0243_MCSVACCAGKTCGWYCABS	0.127907
PA3045_STTGKYGSCGDTGABGTWGT	PA0243_MCSVACCAGKTCGWYCABS	0.414266
PA3094_BSBSCTGBTCGAYCTSSWYG	PA0243_MCSVACCAGKTCGWYCABS	0.640286
PA3122_NGGAATRS	PA0243_MCSVACCAGKTCGWYCABS	0.321456
PA3124_CSATGMYNHSYTGGAATDC	PA0243_MCSVACCAGKTCGWYCABS	0.497918
PA3174_TTGMMCNRSRKCGAC	PA0243_MCSVACCAGKTCGWYCABS	0.54862
PA3215_WWWAAATAHTWKWWAAWHA	PA0243_MCSVACCAGKTCGWYCABS	0.133681
PA3220_TTTWTADTCMTWTBBWTATA	PA0243_MCSVACCAGKTCGWYCABS	0.14196
PA3260_TTWTTAWTWTYTDTT	PA0243_MCSVACCAGKTCGWYCABS	0.227212
PA3420_TGGCCDBSNYGRWCCY	PA0243_MCSVACCAGKTCGWYCABS	0.565402
PA3433_WYGMBSWTGNCGWTG	PA0243_MCSVACCAGKTCGWYCABS	0.415384
PA3508_TTMAAAAWAAWAAWY	PA0243_MCSVACCAGKTCGWYCABS	0.248742
PA3565_TTTTTATTTTHWMTW	PA0243_MCSVACCAGKTCGWYCABS	0.209161
PA3587_KCRNSNYGYTCATS	PA0243_MCSVACCAGKTCGWYCABS	0.401502
PA3604_TYSNSGDYGWYSTBG	PA0243_MCSVACCAGKTCGWYCABS	0.485644
PA3699_DNAWYGAGAAH	PA0243_MCSVACCAGKTCGWYCABS	0.289163
PA3776_TCGSCCWG	PA0243_MCSVACCAGKTCGWYCABS	0.709197
PA3830_TBSWYGBCGRYCWKS	PA0243_MCSVACCAGKTCGWYCABS	0.585797
PA3845_WWWAAHDDWTWTTTDYWWWW	PA0243_MCSVACCAGKTCGWYCABS	0.153989
PA3927_CAWCGWSAWSRCSMTSDMCG	PA0243_MCSVACCAGKTCGWYCABS	0.818544
PA3965_WHCGAAAS	PA0243_MCSVACCAGKTCGWYCABS	0.483453
PA3973_CVWCGSCGASCWGRYCBDCR	PA0243_MCSVACCAGKTCGWYCABS	0.519347
PA4070_AWDRMAWAWDAAAAA	PA0243_MCSVACCAGKTCGWYCABS	0.190021
PA4094_CSAGCAGCAGS	PA0243_MCSVACCAGKTCGWYCABS	0.531579
PA4145_TKAWTYAAAAABAWTWWTT	PA0243_MCSVACCAGKTCGWYCABS	0.214831
PA4157_YSDBGNYSAKCAGSWYGA	PA0243_MCSVACCAGKTCGWYCABS	0.588774
PA4165_YSKYSTYGVYCAKSWHGBGS	PA0243_MCSVACCAGKTCGWYCABS	0.456045
PA0034_CWKGNSSWSCWMGYSSTHGA	PA0279_GCTCTACCAACTGAGCTAY	0.454124
PA0056_TYSRCSHGSDCCDBS	PA0279_GCTCTACCAACTGAGCTAY	0.418895
PA0155_GSTTTCGA	PA0279_GCTCTACCAACTGAGCTAY	0.306567
PA0163_WYGTCGVYGANCWSS	PA0279_GCTCTACCAACTGAGCTAY	0.466401
PA0167_ARSAKSADCAGGWHG	PA0279_GCTCTACCAACTGAGCTAY	0.337416
PA0207_ARAAAAAAWYTTTGA	PA0279_GCTCTACCAACTGAGCTAY	0.312192
PA0217_TMAWHWATAWRAAYAADHAA	PA0279_GCTCTACCAACTGAGCTAY	0.377221
PA0218_CTGCTCGSCGH	PA0279_GCTCTACCAACTGAGCTAY	0.583745
PA0233_YCCTGSTGSTGATCS	PA0279_GCTCTACCAACTGAGCTAY	0.370055
PA0243_MCSVACCAGKTCGWYCABS	PA0279_GCTCTACCAACTGAGCTAY	0.417051
PA0306_WTTGAAAATMAATA	PA0279_GCTCTACCAACTGAGCTAY	0.35751
PA0367_TGAAYRSCDTTYNS	PA0279_GCTCTACCAACTGAGCTAY	0.385573
PA0403_TATAATSNSCGSYTTTHTTB	PA0279_GCTCTACCAACTGAGCTAY	0.346115
PA0448_WGSTGCTS	PA0279_GCTCTACCAACTGAGCTAY	0.54441
PA0475_SCTCGNCGDYSWYSTBGTCG	PA0279_GCTCTACCAACTGAGCTAY	0.261917
PA0527_WDWWWAWYYTYTAMWWRMAW	PA0279_GCTCTACCAACTGAGCTAY	0.348009
PA0533_CTGSTSGVCVWSGBC	PA0279_GCTCTACCAACTGAGCTAY	0.356433
PA0601_CCAGCRCCWGS	PA0279_GCTCTACCAACTGAGCTAY	0.429753
PA0701_AATAVAAAATAAWWA	PA0279_GCTCTACCAACTGAGCTAY	0.30073
PA0756_MTSGBCCWGKKCCWGCAGGW	PA0279_GCTCTACCAACTGAGCTAY	0.393062
PA0797_TGSYGSCGSTGVWSG	PA0279_GCTCTACCAACTGAGCTAY	0.522302
PA0815_SNCSWYCAGCASSDCGRTSW	PA0279_GCTCTACCAACTGAGCTAY	0.476847
PA0816_MTWRWTATTTTTWWTBWATT	PA0279_GCTCTACCAACTGAGCTAY	0.256582
PA0831_TGGCCGRVHWSGACC	PA0279_GCTCTACCAACTGAGCTAY	0.379184
PA0873_WAANWWTDMAHAAAAMAAWT	PA0279_GCTCTACCAACTGAGCTAY	0.324852
PA0876_RWAWNAAWAAATWMWWAAWA	PA0279_GCTCTACCAACTGAGCTAY	0.21886
PA0893_GCGACATC	PA0279_GCTCTACCAACTGAGCTAY	0.331899
PA0942_WSCGSRTCGACASCR	PA0279_GCTCTACCAACTGAGCTAY	0.393642
PA1015_CSBGAATGSCRTTCA	PA0279_GCTCTACCAACTGAGCTAY	0.374717
PA1136_AWTAAAAAWAAWTAWTHAWW	PA0279_GCTCTACCAACTGAGCTAY	0.278902
PA1157_WATDTTTTTTATWKATWTTT	PA0279_GCTCTACCAACTGAGCTAY	0.29562
PA1182_SHSSHGSTGMTCGVC	PA0279_GCTCTACCAACTGAGCTAY	0.641181
PA1184_WTWTTTTTWATTHATWKTTW	PA0279_GCTCTACCAACTGAGCTAY	0.278122
PA1229_SWYGDYCWYGBCGRT	PA0279_GCTCTACCAACTGAGCTAY	0.374817
PA1261_AAWAVAAWWTAAAAA	PA0279_GCTCTACCAACTGAGCTAY	0.295177
PA1283_WWWWWTGWATAAAAAHWWTW	PA0279_GCTCTACCAACTGAGCTAY	0.227811
PA1309_TYGKCSWKGKYSWYSASSDY	PA0279_GCTCTACCAACTGAGCTAY	0.318277
PA1347_CRNCRVCWTCRHCR	PA0279_GCTCTACCAACTGAGCTAY	0.434077
PA1403_AHCWACRRCRWCAMC	PA0279_GCTCTACCAACTGAGCTAY	0.421326
PA1504_SCAGGAHGVCCAGGA	PA0279_GCTCTACCAACTGAGCTAY	0.365155
PA1653_RAVHWSGTCAASCTG	PA0279_GCTCTACCAACTGAGCTAY	0.514707
PA1759_AATARAWAWDAAWAA	PA0279_GCTCTACCAACTGAGCTAY	0.198484
PA1836_SWSGTMGAYSWBSDY	PA0279_GCTCTACCAACTGAGCTAY	0.48867
PA1853_SSANSRCCWSGVYGA	PA0279_GCTCTACCAACTGAGCTAY	0.407785
PA1859_TTTTTRTTWTTWATT	PA0279_GCTCTACCAACTGAGCTAY	0.275532
PA1978_TTGNYGWYCWBGHCG	PA0279_GCTCTACCAACTGAGCTAY	0.400865
PA1998_TGCTCGVC	PA0279_GCTCTACCAACTGAGCTAY	0.625204
PA2010_CTSCTCGSCGNSSNS	PA0279_GCTCTACCAACTGAGCTAY	0.477487
PA2032_SWSGATCWGGYCGANCAGSH	PA0279_GCTCTACCAACTGAGCTAY	0.546669
PA2047_YGAKCAHCRSCAGSR	PA0279_GCTCTACCAACTGAGCTAY	0.434045
PA2056_YCRWSSWGDWCRMCS	PA0279_GCTCTACCAACTGAGCTAY	0.405389
PA2096_MWGGHCRACDHCMWS	PA0279_GCTCTACCAACTGAGCTAY	0.429147
PA2123_GRCCKCGTYGATSRCCAYST	PA0279_GCTCTACCAACTGAGCTAY	0.323115
PA2246_WSCBSSASYTCGMCSAS	PA0279_GCTCTACCAACTGAGCTAY	0.526479
PA2270_WAWYCWAWWHWTYHKYAAAW	PA0279_GCTCTACCAACTGAGCTAY	0.371477
PA2276_WCSTBCTYGADSTYSWYS	PA0279_GCTCTACCAACTGAGCTAY	0.350361
PA2281_TTGDCCWTGTMGADG	PA0279_GCTCTACCAACTGAGCTAY	0.365452
PA2299_CWGGTMGWHCAKGTC	PA0279_GCTCTACCAACTGAGCTAY	0.506904
PA2417_DCGSCGARCAG	PA0279_GCTCTACCAACTGAGCTAY	0.560307
PA2447_WSGNCRMSSWSNYC	PA0279_GCTCTACCAACTGAGCTAY	0.486242
PA2449_HTTMWTWWWTDTTHBTTRTT	PA0279_GCTCTACCAACTGAGCTAY	0.270702
PA2488_WWWAACWTTKAWTWVAAWAT	PA0279_GCTCTACCAACTGAGCTAY	0.417082
PA2547_TCNNCDVCMHSRHCDDCGSC	PA0279_GCTCTACCAACTGAGCTAY	0.330293
PA2551_GAHGRTCRSCA	PA0279_GCTCTACCAACTGAGCTAY	0.453184
PA2556_VTGAKCRNCYHGGACAAS	PA0279_GCTCTACCAACTGAGCTAY	0.700561
PA2601_HCSAGCAGGNYCWGG	PA0279_GCTCTACCAACTGAGCTAY	0.314019
PA2692_WAAAWATDAWTWAARAAWWT	PA0279_GCTCTACCAACTGAGCTAY	0.283248
PA2696_WGRTCWTCGVC	PA0279_GCTCTACCAACTGAGCTAY	0.483971
PA2704_TGGCCDBSBCGATCC	PA0279_GCTCTACCAACTGAGCTAY	0.407622
PA2718_WWWADATNYHAWWWAWDMAT	PA0279_GCTCTACCAACTGAGCTAY	0.325848
PA2766_ATDNATTWWDARMATWTWWW	PA0279_GCTCTACCAACTGAGCTAY	0.290725
PA2848_CTGHTSDDCRHCVHS	PA0279_GCTCTACCAACTGAGCTAY	0.493614
PA2917_TSRASGAMVWGBYSRWGSMG	PA0279_GCTCTACCAACTGAGCTAY	0.434243
PA2930_WATAGGRMAATTCCYAWWKW	PA0279_GCTCTACCAACTGAGCTAY	0.486799
PA2957_TCVASCAGTTC	PA0279_GCTCTACCAACTGAGCTAY	0.581678
PA3027_AATDAAAAANAATAA	PA0279_GCTCTACCAACTGAGCTAY	0.356941
PA3045_STTGKYGSCGDTGABGTWGT	PA0279_GCTCTACCAACTGAGCTAY	0.467679
PA3094_BSBSCTGBTCGAYCTSSWYG	PA0279_GCTCTACCAACTGAGCTAY	0.372724
PA3122_NGGAATRS	PA0279_GCTCTACCAACTGAGCTAY	0.4674
PA3124_CSATGMYNHSYTGGAATDC	PA0279_GCTCTACCAACTGAGCTAY	0.424807
PA3174_TTGMMCNRSRKCGAC	PA0279_GCTCTACCAACTGAGCTAY	0.418783
PA3215_WWWAAATAHTWKWWAAWHA	PA0279_GCTCTACCAACTGAGCTAY	0.269576
PA3220_TTTWTADTCMTWTBBWTATA	PA0279_GCTCTACCAACTGAGCTAY	0.293002
PA3260_TTWTTAWTWTYTDTT	PA0279_GCTCTACCAACTGAGCTAY	0.274304
PA3420_TGGCCDBSNYGRWCCY	PA0279_GCTCTACCAACTGAGCTAY	0.37662
PA3433_WYGMBSWTGNCGWTG	PA0279_GCTCTACCAACTGAGCTAY	0.280049
PA3508_TTMAAAAWAAWAAWY	PA0279_GCTCTACCAACTGAGCTAY	0.37646
PA3565_TTTTTATTTTHWMTW	PA0279_GCTCTACCAACTGAGCTAY	0.213173
PA3587_KCRNSNYGYTCATS	PA0279_GCTCTACCAACTGAGCTAY	0.458707
PA3604_TYSNSGDYGWYSTBG	PA0279_GCTCTACCAACTGAGCTAY	0.204532
PA3699_DNAWYGAGAAH	PA0279_GCTCTACCAACTGAGCTAY	0.283485
PA3776_TCGSCCWG	PA0279_GCTCTACCAACTGAGCTAY	0.566064
PA3830_TBSWYGBCGRYCWKS	PA0279_GCTCTACCAACTGAGCTAY	0.331595
PA3845_WWWAAHDDWTWTTTDYWWWW	PA0279_GCTCTACCAACTGAGCTAY	0.253804
PA3927_CAWCGWSAWSRCSMTSDMCG	PA0279_GCTCTACCAACTGAGCTAY	0.539583
PA3965_WHCGAAAS	PA0279_GCTCTACCAACTGAGCTAY	0.302403
PA3973_CVWCGSCGASCWGRYCBDCR	PA0279_GCTCTACCAACTGAGCTAY	0.505568
PA4070_AWDRMAWAWDAAAAA	PA0279_GCTCTACCAACTGAGCTAY	0.215658
PA4094_CSAGCAGCAGS	PA0279_GCTCTACCAACTGAGCTAY	0.372324
PA4145_TKAWTYAAAAABAWTWWTT	PA0279_GCTCTACCAACTGAGCTAY	0.4402
PA4157_YSDBGNYSAKCAGSWYGA	PA0279_GCTCTACCAACTGAGCTAY	0.507739
PA4165_YSKYSTYGVYCAKSWHGBGS	PA0279_GCTCTACCAACTGAGCTAY	0.323489
PA0034_CWKGNSSWSCWMGYSSTHGA	PA0306_WTTGAAAATMAATA	0.252531
PA0056_TYSRCSHGSDCCDBS	PA0306_WTTGAAAATMAATA	0.222245
PA0155_GSTTTCGA	PA0306_WTTGAAAATMAATA	0.515741
PA0163_WYGTCGVYGANCWSS	PA0306_WTTGAAAATMAATA	0.23411
PA0167_ARSAKSADCAGGWHG	PA0306_WTTGAAAATMAATA	0.252147
PA0207_ARAAAAAAWYTTTGA	PA0306_WTTGAAAATMAATA	0.712126
PA0217_TMAWHWATAWRAAYAADHAA	PA0306_WTTGAAAATMAATA	0.832624
PA0218_CTGCTCGSCGH	PA0306_WTTGAAAATMAATA	0.117437
PA0233_YCCTGSTGSTGATCS	PA0306_WTTGAAAATMAATA	0.197305
PA0243_MCSVACCAGKTCGWYCABS	PA0306_WTTGAAAATMAATA	0.157185
PA0279_GCTCTACCAACTGAGCTAY	PA0306_WTTGAAAATMAATA	0.35751
PA0367_TGAAYRSCDTTYNS	PA0306_WTTGAAAATMAATA	0.416737
PA0403_TATAATSNSCGSYTTTHTTB	PA0306_WTTGAAAATMAATA	0.508075
PA0448_WGSTGCTS	PA0306_WTTGAAAATMAATA	0.118471
PA0475_SCTCGNCGDYSWYSTBGTCG	PA0306_WTTGAAAATMAATA	0.170428
PA0527_WDWWWAWYYTYTAMWWRMAW	PA0306_WTTGAAAATMAATA	0.705482
PA0533_CTGSTSGVCVWSGBC	PA0306_WTTGAAAATMAATA	0.000844415
PA0701_AATAVAAAATAAWWA	PA0306_WTTGAAAATMAATA	0.806829
PA0756_MTSGBCCWGKKCCWGCAGGW	PA0306_WTTGAAAATMAATA	0.158463
PA0797_TGSYGSCGSTGVWSG	PA0306_WTTGAAAATMAATA	0.0183039
PA0815_SNCSWYCAGCASSDCGRTSW	PA0306_WTTGAAAATMAATA	0.138767
PA0816_MTWRWTATTTTTWWTBWATT	PA0306_WTTGAAAATMAATA	0.773186
PA0831_TGGCCGRVHWSGACC	PA0306_WTTGAAAATMAATA	0.337673
PA0873_WAANWWTDMAHAAAAMAAWT	PA0306_WTTGAAAATMAATA	0.790422
PA0876_RWAWNAAWAAATWMWWAAWA	PA0306_WTTGAAAATMAATA	0.804744
PA0893_GCGACATC	PA0306_WTTGAAAATMAATA	0.147805
PA0942_WSCGSRTCGACASCR	PA0306_WTTGAAAATMAATA	0.212799
PA1015_CSBGAATGSCRTTCA	PA0306_WTTGAAAATMAATA	0.359391
PA1136_AWTAAAAAWAAWTAWTHAWW	PA0306_WTTGAAAATMAATA	0.858673
PA1157_WATDTTTTTTATWKATWTTT	PA0306_WTTGAAAATMAATA	0.848553
PA1182_SHSSHGSTGMTCGVC	PA0306_WTTGAAAATMAATA	0.0218171
PA1184_WTWTTTTTWATTHATWKTTW	PA0306_WTTGAAAATMAATA	0.819649
PA1229_SWYGDYCWYGBCGRT	PA0306_WTTGAAAATMAATA	0.21417
PA1261_AAWAVAAWWTAAAAA	PA0306_WTTGAAAATMAATA	0.73343
PA1283_WWWWWTGWATAAAAAHWWTW	PA0306_WTTGAAAATMAATA	0.703236
PA1309_TYGKCSWKGKYSWYSASSDY	PA0306_WTTGAAAATMAATA	0.274161
PA1347_CRNCRVCWTCRHCR	PA0306_WTTGAAAATMAATA	0.283114
PA1403_AHCWACRRCRWCAMC	PA0306_WTTGAAAATMAATA	0.452153
PA1504_SCAGGAHGVCCAGGA	PA0306_WTTGAAAATMAATA	0.0805775
PA1653_RAVHWSGTCAASCTG	PA0306_WTTGAAAATMAATA	0.231638
PA1759_AATARAWAWDAAWAA	PA0306_WTTGAAAATMAATA	0.88278
PA1836_SWSGTMGAYSWBSDY	PA0306_WTTGAAAATMAATA	0.221659
PA1853_SSANSRCCWSGVYGA	PA0306_WTTGAAAATMAATA	0.142477
PA1859_TTTTTRTTWTTWATT	PA0306_WTTGAAAATMAATA	0.936612
PA1978_TTGNYGWYCWBGHCG	PA0306_WTTGAAAATMAATA	0.313296
PA1998_TGCTCGVC	PA0306_WTTGAAAATMAATA	0.14502
PA2010_CTSCTCGSCGNSSNS	PA0306_WTTGAAAATMAATA	0.0712411
PA2032_SWSGATCWGGYCGANCAGSH	PA0306_WTTGAAAATMAATA	0.231211
PA2047_YGAKCAHCRSCAGSR	PA0306_WTTGAAAATMAATA	0.168294
PA2056_YCRWSSWGDWCRMCS	PA0306_WTTGAAAATMAATA	0.199278
PA2096_MWGGHCRACDHCMWS	PA0306_WTTGAAAATMAATA	0.241363
PA2123_GRCCKCGTYGATSRCCAYST	PA0306_WTTGAAAATMAATA	0.158924
PA2246_WSCBSSASYTCGMCSAS	PA0306_WTTGAAAATMAATA	0.108882
PA2270_WAWYCWAWWHWTYHKYAAAW	PA0306_WTTGAAAATMAATA	0.709338
PA2276_WCSTBCTYGADSTYSWYS	PA0306_WTTGAAAATMAATA	0.212888
PA2281_TTGDCCWTGTMGADG	PA0306_WTTGAAAATMAATA	0.292789
PA2299_CWGGTMGWHCAKGTC	PA0306_WTTGAAAATMAATA	0.252717
PA2417_DCGSCGARCAG	PA0306_WTTGAAAATMAATA	0.112856
PA2447_WSGNCRMSSWSNYC	PA0306_WTTGAAAATMAATA	0.0771637
PA2449_HTTMWTWWWTDTTHBTTRTT	PA0306_WTTGAAAATMAATA	0.833867
PA2488_WWWAACWTTKAWTWVAAWAT	PA0306_WTTGAAAATMAATA	0.889574
PA2547_TCNNCDVCMHSRHCDDCGSC	PA0306_WTTGAAAATMAATA	0.145791
PA2551_GAHGRTCRSCA	PA0306_WTTGAAAATMAATA	0.359557
PA2556_VTGAKCRNCYHGGACAAS	PA0306_WTTGAAAATMAATA	0.294544
PA2601_HCSAGCAGGNYCWGG	PA0306_WTTGAAAATMAATA	0.154547
PA2692_WAAAWATDAWTWAARAAWWT	PA0306_WTTGAAAATMAATA	0.86858
PA2696_WGRTCWTCGVC	PA0306_WTTGAAAATMAATA	0.360218
PA2704_TGGCCDBSBCGATCC	PA0306_WTTGAAAATMAATA	0.0865573
PA2718_WWWADATNYHAWWWAWDMAT	PA0306_WTTGAAAATMAATA	0.752946
PA2766_ATDNATTWWDARMATWTWWW	PA0306_WTTGAAAATMAATA	0.83895
PA2848_CTGHTSDDCRHCVHS	PA0306_WTTGAAAATMAATA	0.311255
PA2917_TSRASGAMVWGBYSRWGSMG	PA0306_WTTGAAAATMAATA	0.209929
PA2930_WATAGGRMAATTCCYAWWKW	PA0306_WTTGAAAATMAATA	0.598889
PA2957_TCVASCAGTTC	PA0306_WTTGAAAATMAATA	0.280594
PA3027_AATDAAAAANAATAA	PA0306_WTTGAAAATMAATA	0.786592
PA3045_STTGKYGSCGDTGABGTWGT	PA0306_WTTGAAAATMAATA	0.376018
PA3094_BSBSCTGBTCGAYCTSSWYG	PA0306_WTTGAAAATMAATA	0.158809
PA3122_NGGAATRS	PA0306_WTTGAAAATMAATA	0.462208
PA3124_CSATGMYNHSYTGGAATDC	PA0306_WTTGAAAATMAATA	0.352733
PA3174_TTGMMCNRSRKCGAC	PA0306_WTTGAAAATMAATA	0.365645
PA3215_WWWAAATAHTWKWWAAWHA	PA0306_WTTGAAAATMAATA	0.816646
PA3220_TTTWTADTCMTWTBBWTATA	PA0306_WTTGAAAATMAATA	0.75066
PA3260_TTWTTAWTWTYTDTT	PA0306_WTTGAAAATMAATA	0.890205
PA3420_TGGCCDBSNYGRWCCY	PA0306_WTTGAAAATMAATA	0.0735501
PA3433_WYGMBSWTGNCGWTG	PA0306_WTTGAAAATMAATA	0.313835
PA3508_TTMAAAAWAAWAAWY	PA0306_WTTGAAAATMAATA	0.786658
PA3565_TTTTTATTTTHWMTW	PA0306_WTTGAAAATMAATA	0.780548
PA3587_KCRNSNYGYTCATS	PA0306_WTTGAAAATMAATA	0.273578
PA3604_TYSNSGDYGWYSTBG	PA0306_WTTGAAAATMAATA	0.320368
PA3699_DNAWYGAGAAH	PA0306_WTTGAAAATMAATA	0.709473
PA3776_TCGSCCWG	PA0306_WTTGAAAATMAATA	0.0627566
PA3830_TBSWYGBCGRYCWKS	PA0306_WTTGAAAATMAATA	0.23168
PA3845_WWWAAHDDWTWTTTDYWWWW	PA0306_WTTGAAAATMAATA	0.742013
PA3927_CAWCGWSAWSRCSMTSDMCG	PA0306_WTTGAAAATMAATA	0.243367
PA3965_WHCGAAAS	PA0306_WTTGAAAATMAATA	0.602833
PA3973_CVWCGSCGASCWGRYCBDCR	PA0306_WTTGAAAATMAATA	0.0434999
PA4070_AWDRMAWAWDAAAAA	PA0306_WTTGAAAATMAATA	0.728445
PA4094_CSAGCAGCAGS	PA0306_WTTGAAAATMAATA	0.0642773
PA4145_TKAWTYAAAAABAWTWWTT	PA0306_WTTGAAAATMAATA	0.883424
PA4157_YSDBGNYSAKCAGSWYGA	PA0306_WTTGAAAATMAATA	0.122207
PA4165_YSKYSTYGVYCAKSWHGBGS	PA0306_WTTGAAAATMAATA	0.102192
PA0034_CWKGNSSWSCWMGYSSTHGA	PA0367_TGAAYRSCDTTYNS	0.585839
PA0056_TYSRCSHGSDCCDBS	PA0367_TGAAYRSCDTTYNS	0.333195
PA0155_GSTTTCGA	PA0367_TGAAYRSCDTTYNS	0.466817
PA0163_WYGTCGVYGANCWSS	PA0367_TGAAYRSCDTTYNS	0.514443
PA0167_ARSAKSADCAGGWHG	PA0367_TGAAYRSCDTTYNS	0.502845
PA0207_ARAAAAAAWYTTTGA	PA0367_TGAAYRSCDTTYNS	0.291588
PA0217_TMAWHWATAWRAAYAADHAA	PA0367_TGAAYRSCDTTYNS	0.297059
PA0218_CTGCTCGSCGH	PA0367_TGAAYRSCDTTYNS	0.503418
PA0233_YCCTGSTGSTGATCS	PA0367_TGAAYRSCDTTYNS	0.624708
PA0243_MCSVACCAGKTCGWYCABS	PA0367_TGAAYRSCDTTYNS	0.322142
PA0279_GCTCTACCAACTGAGCTAY	PA0367_TGAAYRSCDTTYNS	0.385573
PA0306_WTTGAAAATMAATA	PA0367_TGAAYRSCDTTYNS	0.416737
PA0403_TATAATSNSCGSYTTTHTTB	PA0367_TGAAYRSCDTTYNS	0.368794
PA0448_WGSTGCTS	PA0367_TGAAYRSCDTTYNS	0.536722
PA0475_SCTCGNCGDYSWYSTBGTCG	PA0367_TGAAYRSCDTTYNS	0.430929
PA0527_WDWWWAWYYTYTAMWWRMAW	PA0367_TGAAYRSCDTTYNS	0.28893
PA0533_CTGSTSGVCVWSGBC	PA0367_TGAAYRSCDTTYNS	0.443122
PA0601_CCAGCRCCWGS	PA0367_TGAAYRSCDTTYNS	0.32418
PA0701_AATAVAAAATAAWWA	PA0367_TGAAYRSCDTTYNS	0.431124
PA0756_MTSGBCCWGKKCCWGCAGGW	PA0367_TGAAYRSCDTTYNS	0.287228
PA0797_TGSYGSCGSTGVWSG	PA0367_TGAAYRSCDTTYNS	0.569273
PA0815_SNCSWYCAGCASSDCGRTSW	PA0367_TGAAYRSCDTTYNS	0.622158
PA0816_MTWRWTATTTTTWWTBWATT	PA0367_TGAAYRSCDTTYNS	0.459773
PA0831_TGGCCGRVHWSGACC	PA0367_TGAAYRSCDTTYNS	0.400194
PA0873_WAANWWTDMAHAAAAMAAWT	PA0367_TGAAYRSCDTTYNS	0.318116
PA0876_RWAWNAAWAAATWMWWAAWA	PA0367_TGAAYRSCDTTYNS	0.185603
PA0893_GCGACATC	PA0367_TGAAYRSCDTTYNS	0.436523
PA0942_WSCGSRTCGACASCR	PA0367_TGAAYRSCDTTYNS	0.607965
PA1015_CSBGAATGSCRTTCA	PA0367_TGAAYRSCDTTYNS	0.91085
PA1136_AWTAAAAAWAAWTAWTHAWW	PA0367_TGAAYRSCDTTYNS	0.254574
PA1157_WATDTTTTTTATWKATWTTT	PA0367_TGAAYRSCDTTYNS	0.377802
PA1182_SHSSHGSTGMTCGVC	PA0367_TGAAYRSCDTTYNS	0.634178
PA1184_WTWTTTTTWATTHATWKTTW	PA0367_TGAAYRSCDTTYNS	0.20894
PA1229_SWYGDYCWYGBCGRT	PA0367_TGAAYRSCDTTYNS	0.491863
PA1261_AAWAVAAWWTAAAAA	PA0367_TGAAYRSCDTTYNS	0.395193
PA1283_WWWWWTGWATAAAAAHWWTW	PA0367_TGAAYRSCDTTYNS	0.315513
PA1309_TYGKCSWKGKYSWYSASSDY	PA0367_TGAAYRSCDTTYNS	0.435024
PA1347_CRNCRVCWTCRHCR	PA0367_TGAAYRSCDTTYNS	0.371206
PA1403_AHCWACRRCRWCAMC	PA0367_TGAAYRSCDTTYNS	0.454737
PA1504_SCAGGAHGVCCAGGA	PA0367_TGAAYRSCDTTYNS	0.401132
PA1653_RAVHWSGTCAASCTG	PA0367_TGAAYRSCDTTYNS	0.447568
PA1759_AATARAWAWDAAWAA	PA0367_TGAAYRSCDTTYNS	0.28205
PA1836_SWSGTMGAYSWBSDY	PA0367_TGAAYRSCDTTYNS	0.349785
PA1853_SSANSRCCWSGVYGA	PA0367_TGAAYRSCDTTYNS	0.394389
PA1859_TTTTTRTTWTTWATT	PA0367_TGAAYRSCDTTYNS	0.36057
PA1978_TTGNYGWYCWBGHCG	PA0367_TGAAYRSCDTTYNS	0.433253
PA1998_TGCTCGVC	PA0367_TGAAYRSCDTTYNS	0.617413
PA2010_CTSCTCGSCGNSSNS	PA0367_TGAAYRSCDTTYNS	0.445917
PA2032_SWSGATCWGGYCGANCAGSH	PA0367_TGAAYRSCDTTYNS	0.488898
PA2047_YGAKCAHCRSCAGSR	PA0367_TGAAYRSCDTTYNS	0.641772
PA2056_YCRWSSWGDWCRMCS	PA0367_TGAAYRSCDTTYNS	0.521969
PA2096_MWGGHCRACDHCMWS	PA0367_TGAAYRSCDTTYNS	0.438483
PA2123_GRCCKCGTYGATSRCCAYST	PA0367_TGAAYRSCDTTYNS	0.44409
PA2246_WSCBSSASYTCGMCSAS	PA0367_TGAAYRSCDTTYNS	0.315003
PA2270_WAWYCWAWWHWTYHKYAAAW	PA0367_TGAAYRSCDTTYNS	0.454499
PA2276_WCSTBCTYGADSTYSWYS	PA0367_TGAAYRSCDTTYNS	0.307274
PA2281_TTGDCCWTGTMGADG	PA0367_TGAAYRSCDTTYNS	0.341873
PA2299_CWGGTMGWHCAKGTC	PA0367_TGAAYRSCDTTYNS	0.481052
PA2417_DCGSCGARCAG	PA0367_TGAAYRSCDTTYNS	0.466864
PA2447_WSGNCRMSSWSNYC	PA0367_TGAAYRSCDTTYNS	0.555732
PA2449_HTTMWTWWWTDTTHBTTRTT	PA0367_TGAAYRSCDTTYNS	0.268247
PA2488_WWWAACWTTKAWTWVAAWAT	PA0367_TGAAYRSCDTTYNS	0.398954
PA2547_TCNNCDVCMHSRHCDDCGSC	PA0367_TGAAYRSCDTTYNS	0.497103
PA2551_GAHGRTCRSCA	PA0367_TGAAYRSCDTTYNS	0.716543
PA2556_VTGAKCRNCYHGGACAAS	PA0367_TGAAYRSCDTTYNS	0.475448
PA2601_HCSAGCAGGNYCWGG	PA0367_TGAAYRSCDTTYNS	0.335184
PA2692_WAAAWATDAWTWAARAAWWT	PA0367_TGAAYRSCDTTYNS	0.29444
PA2696_WGRTCWTCGVC	PA0367_TGAAYRSCDTTYNS	0.475298
PA2704_TGGCCDBSBCGATCC	PA0367_TGAAYRSCDTTYNS	0.379714
PA2718_WWWADATNYHAWWWAWDMAT	PA0367_TGAAYRSCDTTYNS	0.293439
PA2766_ATDNATTWWDARMATWTWWW	PA0367_TGAAYRSCDTTYNS	0.244778
PA2848_CTGHTSDDCRHCVHS	PA0367_TGAAYRSCDTTYNS	0.663723
PA2917_TSRASGAMVWGBYSRWGSMG	PA0367_TGAAYRSCDTTYNS	0.383318
PA2930_WATAGGRMAATTCCYAWWKW	PA0367_TGAAYRSCDTTYNS	0.309233
PA2957_TCVASCAGTTC	PA0367_TGAAYRSCDTTYNS	0.370302
PA3027_AATDAAAAANAATAA	PA0367_TGAAYRSCDTTYNS	0.237544
PA3045_STTGKYGSCGDTGABGTWGT	PA0367_TGAAYRSCDTTYNS	0.41654
PA3094_BSBSCTGBTCGAYCTSSWYG	PA0367_TGAAYRSCDTTYNS	0.493275
PA3122_NGGAATRS	PA0367_TGAAYRSCDTTYNS	0.701616
PA3124_CSATGMYNHSYTGGAATDC	PA0367_TGAAYRSCDTTYNS	0.658516
PA3174_TTGMMCNRSRKCGAC	PA0367_TGAAYRSCDTTYNS	0.445254
PA3215_WWWAAATAHTWKWWAAWHA	PA0367_TGAAYRSCDTTYNS	0.417629
PA3220_TTTWTADTCMTWTBBWTATA	PA0367_TGAAYRSCDTTYNS	0.337149
PA3260_TTWTTAWTWTYTDTT	PA0367_TGAAYRSCDTTYNS	0.397942
PA3420_TGGCCDBSNYGRWCCY	PA0367_TGAAYRSCDTTYNS	0.411048
PA3433_WYGMBSWTGNCGWTG	PA0367_TGAAYRSCDTTYNS	0.420252
PA3508_TTMAAAAWAAWAAWY	PA0367_TGAAYRSCDTTYNS	0.323048
PA3565_TTTTTATTTTHWMTW	PA0367_TGAAYRSCDTTYNS	0.430534
PA3587_KCRNSNYGYTCATS	PA0367_TGAAYRSCDTTYNS	0.706687
PA3604_TYSNSGDYGWYSTBG	PA0367_TGAAYRSCDTTYNS	0.302299
PA3699_DNAWYGAGAAH	PA0367_TGAAYRSCDTTYNS	0.819754
PA3776_TCGSCCWG	PA0367_TGAAYRSCDTTYNS	0.382235
PA3830_TBSWYGBCGRYCWKS	PA0367_TGAAYRSCDTTYNS	0.354955
PA3845_WWWAAHDDWTWTTTDYWWWW	PA0367_TGAAYRSCDTTYNS	0.270227
PA3927_CAWCGWSAWSRCSMTSDMCG	PA0367_TGAAYRSCDTTYNS	0.684248
PA3965_WHCGAAAS	PA0367_TGAAYRSCDTTYNS	0.460032
PA3973_CVWCGSCGASCWGRYCBDCR	PA0367_TGAAYRSCDTTYNS	0.376475
PA4070_AWDRMAWAWDAAAAA	PA0367_TGAAYRSCDTTYNS	0.305151
PA4094_CSAGCAGCAGS	PA0367_TGAAYRSCDTTYNS	0.449459
PA4145_TKAWTYAAAAABAWTWWTT	PA0367_TGAAYRSCDTTYNS	0.293791
PA4157_YSDBGNYSAKCAGSWYGA	PA0367_TGAAYRSCDTTYNS	0.466146
PA4165_YSKYSTYGVYCAKSWHGBGS	PA0367_TGAAYRSCDTTYNS	0.486746
PA0034_CWKGNSSWSCWMGYSSTHGA	PA0403_TATAATSNSCGSYTTTHTTB	0.321515
PA0056_TYSRCSHGSDCCDBS	PA0403_TATAATSNSCGSYTTTHTTB	0.311667
PA0155_GSTTTCGA	PA0403_TATAATSNSCGSYTTTHTTB	0.409891
PA0163_WYGTCGVYGANCWSS	PA0403_TATAATSNSCGSYTTTHTTB	0.407869
PA0167_ARSAKSADCAGGWHG	PA0403_TATAATSNSCGSYTTTHTTB	0.248866
PA0207_ARAAAAAAWYTTTGA	PA0403_TATAATSNSCGSYTTTHTTB	0.42065
PA0217_TMAWHWATAWRAAYAADHAA	PA0403_TATAATSNSCGSYTTTHTTB	0.593046
PA0218_CTGCTCGSCGH	PA0403_TATAATSNSCGSYTTTHTTB	0.301582
PA0233_YCCTGSTGSTGATCS	PA0403_TATAATSNSCGSYTTTHTTB	0.301601
PA0243_MCSVACCAGKTCGWYCABS	PA0403_TATAATSNSCGSYTTTHTTB	0.206728
PA0279_GCTCTACCAACTGAGCTAY	PA0403_TATAATSNSCGSYTTTHTTB	0.346115
PA0306_WTTGAAAATMAATA	PA0403_TATAATSNSCGSYTTTHTTB	0.508075
PA0367_TGAAYRSCDTTYNS	PA0403_TATAATSNSCGSYTTTHTTB	0.368794
PA0448_WGSTGCTS	PA0403_TATAATSNSCGSYTTTHTTB	0.475583
PA0475_SCTCGNCGDYSWYSTBGTCG	PA0403_TATAATSNSCGSYTTTHTTB	0.310667
PA0527_WDWWWAWYYTYTAMWWRMAW	PA0403_TATAATSNSCGSYTTTHTTB	0.511523
PA0533_CTGSTSGVCVWSGBC	PA0403_TATAATSNSCGSYTTTHTTB	0.156477
PA0601_CCAGCRCCWGS	PA0403_TATAATSNSCGSYTTTHTTB	0.306453
PA0701_AATAVAAAATAAWWA	PA0403_TATAATSNSCGSYTTTHTTB	0.522851
PA0756_MTSGBCCWGKKCCWGCAGGW	PA0403_TATAATSNSCGSYTTTHTTB	0.381376
PA0797_TGSYGSCGSTGVWSG	PA0403_TATAATSNSCGSYTTTHTTB	0.323962
PA0815_SNCSWYCAGCASSDCGRTSW	PA0403_TATAATSNSCGSYTTTHTTB	0.406398
PA0816_MTWRWTATTTTTWWTBWATT	PA0403_TATAATSNSCGSYTTTHTTB	0.358605
PA0831_TGGCCGRVHWSGACC	PA0403_TATAATSNSCGSYTTTHTTB	0.327438
PA0873_WAANWWTDMAHAAAAMAAWT	PA0403_TATAATSNSCGSYTTTHTTB	0.263954
PA0876_RWAWNAAWAAATWMWWAAWA	PA0403_TATAATSNSCGSYTTTHTTB	0.550558
PA0893_GCGACATC	PA0403_TATAATSNSCGSYTTTHTTB	0.418256
PA0942_WSCGSRTCGACASCR	PA0403_TATAATSNSCGSYTTTHTTB	0.292015
PA1015_CSBGAATGSCRTTCA	PA0403_TATAATSNSCGSYTTTHTTB	0.236442
PA1136_AWTAAAAAWAAWTAWTHAWW	PA0403_TATAATSNSCGSYTTTHTTB	0.295055
PA1157_WATDTTTTTTATWKATWTTT	PA0403_TATAATSNSCGSYTTTHTTB	0.467784
PA1182_SHSSHGSTGMTCGVC	PA0403_TATAATSNSCGSYTTTHTTB	0.366244
PA1184_WTWTTTTTWATTHATWKTTW	PA0403_TATAATSNSCGSYTTTHTTB	0.759894
PA1229_SWYGDYCWYGBCGRT	PA0403_TATAATSNSCGSYTTTHTTB	0.344971
PA1261_AAWAVAAWWTAAAAA	PA0403_TATAATSNSCGSYTTTHTTB	0.570062
PA1283_WWWWWTGWATAAAAAHWWTW	PA0403_TATAATSNSCGSYTTTHTTB	0.564788
PA1309_TYGKCSWKGKYSWYSASSDY	PA0403_TATAATSNSCGSYTTTHTTB	0.310229
PA1347_CRNCRVCWTCRHCR	PA0403_TATAATSNSCGSYTTTHTTB	0.348968
PA1403_AHCWACRRCRWCAMC	PA0403_TATAATSNSCGSYTTTHTTB	0.413376
PA1504_SCAGGAHGVCCAGGA	PA0403_TATAATSNSCGSYTTTHTTB	0.323044
PA1653_RAVHWSGTCAASCTG	PA0403_TATAATSNSCGSYTTTHTTB	0.342283
PA1759_AATARAWAWDAAWAA	PA0403_TATAATSNSCGSYTTTHTTB	0.644195
PA1836_SWSGTMGAYSWBSDY	PA0403_TATAATSNSCGSYTTTHTTB	0.392733
PA1853_SSANSRCCWSGVYGA	PA0403_TATAATSNSCGSYTTTHTTB	0.254028
PA1859_TTTTTRTTWTTWATT	PA0403_TATAATSNSCGSYTTTHTTB	0.497622
PA1978_TTGNYGWYCWBGHCG	PA0403_TATAATSNSCGSYTTTHTTB	0.280406
PA1998_TGCTCGVC	PA0403_TATAATSNSCGSYTTTHTTB	0.512909
PA2010_CTSCTCGSCGNSSNS	PA0403_TATAATSNSCGSYTTTHTTB	0.252733
PA2032_SWSGATCWGGYCGANCAGSH	PA0403_TATAATSNSCGSYTTTHTTB	0.363867
PA2047_YGAKCAHCRSCAGSR	PA0403_TATAATSNSCGSYTTTHTTB	0.328598
PA2056_YCRWSSWGDWCRMCS	PA0403_TATAATSNSCGSYTTTHTTB	0.446671
PA2096_MWGGHCRACDHCMWS	PA0403_TATAATSNSCGSYTTTHTTB	0.347795
PA2123_GRCCKCGTYGATSRCCAYST	PA0403_TATAATSNSCGSYTTTHTTB	0.437048
PA2246_WSCBSSASYTCGMCSAS	PA0403_TATAATSNSCGSYTTTHTTB	0.233983
PA2270_WAWYCWAWWHWTYHKYAAAW	PA0403_TATAATSNSCGSYTTTHTTB	0.44688
PA2276_WCSTBCTYGADSTYSWYS	PA0403_TATAATSNSCGSYTTTHTTB	0.453893
PA2281_TTGDCCWTGTMGADG	PA0403_TATAATSNSCGSYTTTHTTB	0.289626
PA2299_CWGGTMGWHCAKGTC	PA0403_TATAATSNSCGSYTTTHTTB	0.346738
PA2417_DCGSCGARCAG	PA0403_TATAATSNSCGSYTTTHTTB	0.321921
PA2447_WSGNCRMSSWSNYC	PA0403_TATAATSNSCGSYTTTHTTB	0.262361
PA2449_HTTMWTWWWTDTTHBTTRTT	PA0403_TATAATSNSCGSYTTTHTTB	0.3925
PA2488_WWWAACWTTKAWTWVAAWAT	PA0403_TATAATSNSCGSYTTTHTTB	0.361763
PA2547_TCNNCDVCMHSRHCDDCGSC	PA0403_TATAATSNSCGSYTTTHTTB	0.388016
PA2551_GAHGRTCRSCA	PA0403_TATAATSNSCGSYTTTHTTB	0.466764
PA2556_VTGAKCRNCYHGGACAAS	PA0403_TATAATSNSCGSYTTTHTTB	0.280755
PA2601_HCSAGCAGGNYCWGG	PA0403_TATAATSNSCGSYTTTHTTB	0.251773
PA2692_WAAAWATDAWTWAARAAWWT	PA0403_TATAATSNSCGSYTTTHTTB	0.470707
PA2696_WGRTCWTCGVC	PA0403_TATAATSNSCGSYTTTHTTB	0.504583
PA2704_TGGCCDBSBCGATCC	PA0403_TATAATSNSCGSYTTTHTTB	0.352811
PA2718_WWWADATNYHAWWWAWDMAT	PA0403_TATAATSNSCGSYTTTHTTB	0.451023
PA2766_ATDNATTWWDARMATWTWWW	PA0403_TATAATSNSCGSYTTTHTTB	0.719009
PA2848_CTGHTSDDCRHCVHS	PA0403_TATAATSNSCGSYTTTHTTB	0.261436
PA2917_TSRASGAMVWGBYSRWGSMG	PA0403_TATAATSNSCGSYTTTHTTB	0.187301
PA2930_WATAGGRMAATTCCYAWWKW	PA0403_TATAATSNSCGSYTTTHTTB	0.288968
PA2957_TCVASCAGTTC	PA0403_TATAATSNSCGSYTTTHTTB	0.312842
PA3027_AATDAAAAANAATAA	PA0403_TATAATSNSCGSYTTTHTTB	0.72709
PA3045_STTGKYGSCGDTGABGTWGT	PA0403_TATAATSNSCGSYTTTHTTB	0.277853
PA3094_BSBSCTGBTCGAYCTSSWYG	PA0403_TATAATSNSCGSYTTTHTTB	0.40495
PA3122_NGGAATRS	PA0403_TATAATSNSCGSYTTTHTTB	0.526552
PA3124_CSATGMYNHSYTGGAATDC	PA0403_TATAATSNSCGSYTTTHTTB	0.482972
PA3174_TTGMMCNRSRKCGAC	PA0403_TATAATSNSCGSYTTTHTTB	0.230189
PA3215_WWWAAATAHTWKWWAAWHA	PA0403_TATAATSNSCGSYTTTHTTB	0.524558
PA3220_TTTWTADTCMTWTBBWTATA	PA0403_TATAATSNSCGSYTTTHTTB	0.620752
PA3260_TTWTTAWTWTYTDTT	PA0403_TATAATSNSCGSYTTTHTTB	0.521562
PA3420_TGGCCDBSNYGRWCCY	PA0403_TATAATSNSCGSYTTTHTTB	0.343081
PA3433_WYGMBSWTGNCGWTG	PA0403_TATAATSNSCGSYTTTHTTB	0.230811
PA3508_TTMAAAAWAAWAAWY	PA0403_TATAATSNSCGSYTTTHTTB	0.609688
PA3565_TTTTTATTTTHWMTW	PA0403_TATAATSNSCGSYTTTHTTB	0.594358
PA3587_KCRNSNYGYTCATS	PA0403_TATAATSNSCGSYTTTHTTB	0.338106
PA3604_TYSNSGDYGWYSTBG	PA0403_TATAATSNSCGSYTTTHTTB	0.393711
PA3699_DNAWYGAGAAH	PA0403_TATAATSNSCGSYTTTHTTB	0.484217
PA3776_TCGSCCWG	PA0403_TATAATSNSCGSYTTTHTTB	0.461012
PA3830_TBSWYGBCGRYCWKS	PA0403_TATAATSNSCGSYTTTHTTB	0.316201
PA3845_WWWAAHDDWTWTTTDYWWWW	PA0403_TATAATSNSCGSYTTTHTTB	0.417321
PA3927_CAWCGWSAWSRCSMTSDMCG	PA0403_TATAATSNSCGSYTTTHTTB	0.380395
PA3965_WHCGAAAS	PA0403_TATAATSNSCGSYTTTHTTB	0.38895
PA3973_CVWCGSCGASCWGRYCBDCR	PA0403_TATAATSNSCGSYTTTHTTB	0.275867
PA4070_AWDRMAWAWDAAAAA	PA0403_TATAATSNSCGSYTTTHTTB	0.53253
PA4094_CSAGCAGCAGS	PA0403_TATAATSNSCGSYTTTHTTB	0.251757
PA4145_TKAWTYAAAAABAWTWWTT	PA0403_TATAATSNSCGSYTTTHTTB	0.499157
PA4157_YSDBGNYSAKCAGSWYGA	PA0403_TATAATSNSCGSYTTTHTTB	0.237859
PA4165_YSKYSTYGVYCAKSWHGBGS	PA0403_TATAATSNSCGSYTTTHTTB	0.350232
PA0034_CWKGNSSWSCWMGYSSTHGA	PA0448_WGSTGCTS	0.534713
PA0056_TYSRCSHGSDCCDBS	PA0448_WGSTGCTS	0.618723
PA0155_GSTTTCGA	PA0448_WGSTGCTS	0.25963
PA0163_WYGTCGVYGANCWSS	PA0448_WGSTGCTS	0.704183
PA0167_ARSAKSADCAGGWHG	PA0448_WGSTGCTS	0.699555
PA0207_ARAAAAAAWYTTTGA	PA0448_WGSTGCTS	0.413309
PA0217_TMAWHWATAWRAAYAADHAA	PA0448_WGSTGCTS	0.236846
PA0218_CTGCTCGSCGH	PA0448_WGSTGCTS	0.808733
PA0233_YCCTGSTGSTGATCS	PA0448_WGSTGCTS	0.907079
PA0243_MCSVACCAGKTCGWYCABS	PA0448_WGSTGCTS	0.54978
PA0279_GCTCTACCAACTGAGCTAY	PA0448_WGSTGCTS	0.54441
PA0306_WTTGAAAATMAATA	PA0448_WGSTGCTS	0.118471
PA0367_TGAAYRSCDTTYNS	PA0448_WGSTGCTS	0.536722
PA0403_TATAATSNSCGSYTTTHTTB	PA0448_WGSTGCTS	0.475583
PA0475_SCTCGNCGDYSWYSTBGTCG	PA0448_WGSTGCTS	0.433087
PA0527_WDWWWAWYYTYTAMWWRMAW	PA0448_WGSTGCTS	0.221297
PA0533_CTGSTSGVCVWSGBC	PA0448_WGSTGCTS	0.934674
PA0601_CCAGCRCCWGS	PA0448_WGSTGCTS	0.802064
PA0701_AATAVAAAATAAWWA	PA0448_WGSTGCTS	0.269251
PA0756_MTSGBCCWGKKCCWGCAGGW	PA0448_WGSTGCTS	0.663747
PA0797_TGSYGSCGSTGVWSG	PA0448_WGSTGCTS	0.696209
PA0815_SNCSWYCAGCASSDCGRTSW	PA0448_WGSTGCTS	0.831037
PA0816_MTWRWTATTTTTWWTBWATT	PA0448_WGSTGCTS	0.250189
PA0831_TGGCCGRVHWSGACC	PA0448_WGSTGCTS	0.394794
PA0873_WAANWWTDMAHAAAAMAAWT	PA0448_WGSTGCTS	0.150228
PA0876_RWAWNAAWAAATWMWWAAWA	PA0448_WGSTGCTS	0.0456443
PA0893_GCGACATC	PA0448_WGSTGCTS	0.488737
PA0942_WSCGSRTCGACASCR	PA0448_WGSTGCTS	0.487847
PA1015_CSBGAATGSCRTTCA	PA0448_WGSTGCTS	0.467456
PA1136_AWTAAAAAWAAWTAWTHAWW	PA0448_WGSTGCTS	0.0869691
PA1157_WATDTTTTTTATWKATWTTT	PA0448_WGSTGCTS	0.133083
PA1182_SHSSHGSTGMTCGVC	PA0448_WGSTGCTS	0.806579
PA1184_WTWTTTTTWATTHATWKTTW	PA0448_WGSTGCTS	0.113618
PA1229_SWYGDYCWYGBCGRT	PA0448_WGSTGCTS	0.414593
PA1261_AAWAVAAWWTAAAAA	PA0448_WGSTGCTS	0.316211
PA1283_WWWWWTGWATAAAAAHWWTW	PA0448_WGSTGCTS	0.190982
PA1309_TYGKCSWKGKYSWYSASSDY	PA0448_WGSTGCTS	0.539943
PA1347_CRNCRVCWTCRHCR	PA0448_WGSTGCTS	0.707159
PA1403_AHCWACRRCRWCAMC	PA0448_WGSTGCTS	0.625219
PA1504_SCAGGAHGVCCAGGA	PA0448_WGSTGCTS	0.684747
PA1653_RAVHWSGTCAASCTG	PA0448_WGSTGCTS	0.539588
PA1759_AATARAWAWDAAWAA	PA0448_WGSTGCTS	0.307282
PA1836_SWSGTMGAYSWBSDY	PA0448_WGSTGCTS	0.464339
PA1853_SSANSRCCWSGVYGA	PA0448_WGSTGCTS	0.667912
PA1859_TTTTTRTTWTTWATT	PA0448_WGSTGCTS	0.200248
PA1978_TTGNYGWYCWBGHCG	PA0448_WGSTGCTS	0.423888
PA1998_TGCTCGVC	PA0448_WGSTGCTS	0.40115
PA2010_CTSCTCGSCGNSSNS	PA0448_WGSTGCTS	0.775106
PA2032_SWSGATCWGGYCGANCAGSH	PA0448_WGSTGCTS	0.785168
PA2047_YGAKCAHCRSCAGSR	PA0448_WGSTGCTS	0.762967
PA2056_YCRWSSWGDWCRMCS	PA0448_WGSTGCTS	0.485907
PA2096_MWGGHCRACDHCMWS	PA0448_WGSTGCTS	0.472915
PA2123_GRCCKCGTYGATSRCCAYST	PA0448_WGSTGCTS	0.527958
PA2246_WSCBSSASYTCGMCSAS	PA0448_WGSTGCTS	0.57424
PA2270_WAWYCWAWWHWTYHKYAAAW	PA0448_WGSTGCTS	0.297209
PA2276_WCSTBCTYGADSTYSWYS	PA0448_WGSTGCTS	0.624948
PA2281_TTGDCCWTGTMGADG	PA0448_WGSTGCTS	0.380581
PA2299_CWGGTMGWHCAKGTC	PA0448_WGSTGCTS	0.484777
PA2417_DCGSCGARCAG	PA0448_WGSTGCTS	0.806221
PA2447_WSGNCRMSSWSNYC	PA0448_WGSTGCTS	0.430153
PA2449_HTTMWTWWWTDTTHBTTRTT	PA0448_WGSTGCTS	0.294137
PA2488_WWWAACWTTKAWTWVAAWAT	PA0448_WGSTGCTS	0.23958
PA2547_TCNNCDVCMHSRHCDDCGSC	PA0448_WGSTGCTS	0.498646
PA2551_GAHGRTCRSCA	PA0448_WGSTGCTS	0.573393
PA2556_VTGAKCRNCYHGGACAAS	PA0448_WGSTGCTS	0.564778
PA2601_HCSAGCAGGNYCWGG	PA0448_WGSTGCTS	0.759993
PA2692_WAAAWATDAWTWAARAAWWT	PA0448_WGSTGCTS	0.112022
PA2696_WGRTCWTCGVC	PA0448_WGSTGCTS	0.467166
PA2704_TGGCCDBSBCGATCC	PA0448_WGSTGCTS	0.299396
PA2718_WWWADATNYHAWWWAWDMAT	PA0448_WGSTGCTS	0.192721
PA2766_ATDNATTWWDARMATWTWWW	PA0448_WGSTGCTS	0.162448
PA2848_CTGHTSDDCRHCVHS	PA0448_WGSTGCTS	0.852654
PA2917_TSRASGAMVWGBYSRWGSMG	PA0448_WGSTGCTS	0.640422
PA2930_WATAGGRMAATTCCYAWWKW	PA0448_WGSTGCTS	0.205258
PA2957_TCVASCAGTTC	PA0448_WGSTGCTS	0.710679
PA3027_AATDAAAAANAATAA	PA0448_WGSTGCTS	0.123029
PA3045_STTGKYGSCGDTGABGTWGT	PA0448_WGSTGCTS	0.554126
PA3094_BSBSCTGBTCGAYCTSSWYG	PA0448_WGSTGCTS	0.524772
PA3122_NGGAATRS	PA0448_WGSTGCTS	0.318378
PA3124_CSATGMYNHSYTGGAATDC	PA0448_WGSTGCTS	0.466807
PA3174_TTGMMCNRSRKCGAC	PA0448_WGSTGCTS	0.491845
PA3215_WWWAAATAHTWKWWAAWHA	PA0448_WGSTGCTS	0.0391285
PA3220_TTTWTADTCMTWTBBWTATA	PA0448_WGSTGCTS	0.277069
PA3260_TTWTTAWTWTYTDTT	PA0448_WGSTGCTS	0.233987
PA3420_TGGCCDBSNYGRWCCY	PA0448_WGSTGCTS	0.316164
PA3433_WYGMBSWTGNCGWTG	PA0448_WGSTGCTS	0.446184
PA3508_TTMAAAAWAAWAAWY	PA0448_WGSTGCTS	0.0727823
PA3565_TTTTTATTTTHWMTW	PA0448_WGSTGCTS	0.116174
PA3587_KCRNSNYGYTCATS	PA0448_WGSTGCTS	0.62922
PA3604_TYSNSGDYGWYSTBG	PA0448_WGSTGCTS	0.391591
PA3699_DNAWYGAGAAH	PA0448_WGSTGCTS	0.264636
PA3776_TCGSCCWG	PA0448_WGSTGCTS	0.432826
PA3830_TBSWYGBCGRYCWKS	PA0448_WGSTGCTS	0.45579
PA3845_WWWAAHDDWTWTTTDYWWWW	PA0448_WGSTGCTS	0.213084
PA3927_CAWCGWSAWSRCSMTSDMCG	PA0448_WGSTGCTS	0.495452
PA3965_WHCGAAAS	PA0448_WGSTGCTS	0.183385
PA3973_CVWCGSCGASCWGRYCBDCR	PA0448_WGSTGCTS	0.505239
PA4070_AWDRMAWAWDAAAAA	PA0448_WGSTGCTS	0.147507
PA4094_CSAGCAGCAGS	PA0448_WGSTGCTS	0.912651
PA4145_TKAWTYAAAAABAWTWWTT	PA0448_WGSTGCTS	0.157062
PA4157_YSDBGNYSAKCAGSWYGA	PA0448_WGSTGCTS	0.793805
PA4165_YSKYSTYGVYCAKSWHGBGS	PA0448_WGSTGCTS	0.473163
PA0034_CWKGNSSWSCWMGYSSTHGA	PA0475_SCTCGNCGDYSWYSTBGTCG	0.697255
PA0056_TYSRCSHGSDCCDBS	PA0475_SCTCGNCGDYSWYSTBGTCG	0.64096
PA0155_GSTTTCGA	PA0475_SCTCGNCGDYSWYSTBGTCG	0.486549
PA0163_WYGTCGVYGANCWSS	PA0475_SCTCGNCGDYSWYSTBGTCG	0.867951
PA0167_ARSAKSADCAGGWHG	PA0475_SCTCGNCGDYSWYSTBGTCG	0.449173
PA0207_ARAAAAAAWYTTTGA	PA0475_SCTCGNCGDYSWYSTBGTCG	0.177428
PA0217_TMAWHWATAWRAAYAADHAA	PA0475_SCTCGNCGDYSWYSTBGTCG	0.189331
PA0218_CTGCTCGSCGH	PA0475_SCTCGNCGDYSWYSTBGTCG	0.685406
PA0233_YCCTGSTGSTGATCS	PA0475_SCTCGNCGDYSWYSTBGTCG	0.541104
PA0243_MCSVACCAGKTCGWYCABS	PA0475_SCTCGNCGDYSWYSTBGTCG	0.675045
PA0279_GCTCTACCAACTGAGCTAY	PA0475_SCTCGNCGDYSWYSTBGTCG	0.261917
PA0306_WTTGAAAATMAATA	PA0475_SCTCGNCGDYSWYSTBGTCG	0.170428
PA0367_TGAAYRSCDTTYNS	PA0475_SCTCGNCGDYSWYSTBGTCG	0.430929
PA0403_TATAATSNSCGSYTTTHTTB	PA0475_SCTCGNCGDYSWYSTBGTCG	0.310667
PA0448_WGSTGCTS	PA0475_SCTCGNCGDYSWYSTBGTCG	0.433087
PA0527_WDWWWAWYYTYTAMWWRMAW	PA0475_SCTCGNCGDYSWYSTBGTCG	0.12415
PA0533_CTGSTSGVCVWSGBC	PA0475_SCTCGNCGDYSWYSTBGTCG	0.739122
PA0601_CCAGCRCCWGS	PA0475_SCTCGNCGDYSWYSTBGTCG	0.434426
PA0701_AATAVAAAATAAWWA	PA0475_SCTCGNCGDYSWYSTBGTCG	0.129607
PA0756_MTSGBCCWGKKCCWGCAGGW	PA0475_SCTCGNCGDYSWYSTBGTCG	0.583963
PA0797_TGSYGSCGSTGVWSG	PA0475_SCTCGNCGDYSWYSTBGTCG	0.584167
PA0815_SNCSWYCAGCASSDCGRTSW	PA0475_SCTCGNCGDYSWYSTBGTCG	0.672706
PA0816_MTWRWTATTTTTWWTBWATT	PA0475_SCTCGNCGDYSWYSTBGTCG	0.214086
PA0831_TGGCCGRVHWSGACC	PA0475_SCTCGNCGDYSWYSTBGTCG	0.620265
PA0873_WAANWWTDMAHAAAAMAAWT	PA0475_SCTCGNCGDYSWYSTBGTCG	0.200371
PA0876_RWAWNAAWAAATWMWWAAWA	PA0475_SCTCGNCGDYSWYSTBGTCG	0.0866712
PA0893_GCGACATC	PA0475_SCTCGNCGDYSWYSTBGTCG	0.722621
PA0942_WSCGSRTCGACASCR	PA0475_SCTCGNCGDYSWYSTBGTCG	0.672189
PA1015_CSBGAATGSCRTTCA	PA0475_SCTCGNCGDYSWYSTBGTCG	0.465586
PA1136_AWTAAAAAWAAWTAWTHAWW	PA0475_SCTCGNCGDYSWYSTBGTCG	0.0477232
PA1157_WATDTTTTTTATWKATWTTT	PA0475_SCTCGNCGDYSWYSTBGTCG	0.15208
PA1182_SHSSHGSTGMTCGVC	PA0475_SCTCGNCGDYSWYSTBGTCG	0.748092
PA1184_WTWTTTTTWATTHATWKTTW	PA0475_SCTCGNCGDYSWYSTBGTCG	0.300871
PA1229_SWYGDYCWYGBCGRT	PA0475_SCTCGNCGDYSWYSTBGTCG	0.797287
PA1261_AAWAVAAWWTAAAAA	PA0475_SCTCGNCGDYSWYSTBGTCG	0.169299
PA1283_WWWWWTGWATAAAAAHWWTW	PA0475_SCTCGNCGDYSWYSTBGTCG	0.083693
PA1309_TYGKCSWKGKYSWYSASSDY	PA0475_SCTCGNCGDYSWYSTBGTCG	0.74074
PA1347_CRNCRVCWTCRHCR	PA0475_SCTCGNCGDYSWYSTBGTCG	0.648631
PA1403_AHCWACRRCRWCAMC	PA0475_SCTCGNCGDYSWYSTBGTCG	0.625
PA1504_SCAGGAHGVCCAGGA	PA0475_SCTCGNCGDYSWYSTBGTCG	0.643211
PA1653_RAVHWSGTCAASCTG	PA0475_SCTCGNCGDYSWYSTBGTCG	0.634288
PA1759_AATARAWAWDAAWAA	PA0475_SCTCGNCGDYSWYSTBGTCG	0.0865873
PA1836_SWSGTMGAYSWBSDY	PA0475_SCTCGNCGDYSWYSTBGTCG	0.895512
PA1853_SSANSRCCWSGVYGA	PA0475_SCTCGNCGDYSWYSTBGTCG	0.667086
PA1859_TTTTTRTTWTTWATT	PA0475_SCTCGNCGDYSWYSTBGTCG	0.235766
PA1978_TTGNYGWYCWBGHCG	PA0475_SCTCGNCGDYSWYSTBGTCG	0.755417
PA1998_TGCTCGVC	PA0475_SCTCGNCGDYSWYSTBGTCG	0.716452
PA2010_CTSCTCGSCGNSSNS	PA0475_SCTCGNCGDYSWYSTBGTCG	0.667597
PA2032_SWSGATCWGGYCGANCAGSH	PA0475_SCTCGNCGDYSWYSTBGTCG	0.683248
PA2047_YGAKCAHCRSCAGSR	PA0475_SCTCGNCGDYSWYSTBGTCG	0.489174
PA2056_YCRWSSWGDWCRMCS	PA0475_SCTCGNCGDYSWYSTBGTCG	0.761885
PA2096_MWGGHCRACDHCMWS	PA0475_SCTCGNCGDYSWYSTBGTCG	0.766387
PA2123_GRCCKCGTYGATSRCCAYST	PA0475_SCTCGNCGDYSWYSTBGTCG	0.687371
PA2246_WSCBSSASYTCGMCSAS	PA0475_SCTCGNCGDYSWYSTBGTCG	0.800929
PA2270_WAWYCWAWWHWTYHKYAAAW	PA0475_SCTCGNCGDYSWYSTBGTCG	0.19938
PA2276_WCSTBCTYGADSTYSWYS	PA0475_SCTCGNCGDYSWYSTBGTCG	0.765732
PA2281_TTGDCCWTGTMGADG	PA0475_SCTCGNCGDYSWYSTBGTCG	0.707314
PA2299_CWGGTMGWHCAKGTC	PA0475_SCTCGNCGDYSWYSTBGTCG	0.6224
PA2417_DCGSCGARCAG	PA0475_SCTCGNCGDYSWYSTBGTCG	0.700718
PA2447_WSGNCRMSSWSNYC	PA0475_SCTCGNCGDYSWYSTBGTCG	0.755224
PA2449_HTTMWTWWWTDTTHBTTRTT	PA0475_SCTCGNCGDYSWYSTBGTCG	0.0907243
PA2488_WWWAACWTTKAWTWVAAWAT	PA0475_SCTCGNCGDYSWYSTBGTCG	0.161761
PA2547_TCNNCDVCMHSRHCDDCGSC	PA0475_SCTCGNCGDYSWYSTBGTCG	0.547177
PA2551_GAHGRTCRSCA	PA0475_SCTCGNCGDYSWYSTBGTCG	0.531654
PA2556_VTGAKCRNCYHGGACAAS	PA0475_SCTCGNCGDYSWYSTBGTCG	0.725635
PA2601_HCSAGCAGGNYCWGG	PA0475_SCTCGNCGDYSWYSTBGTCG	0.563436
PA2692_WAAAWATDAWTWAARAAWWT	PA0475_SCTCGNCGDYSWYSTBGTCG	0.0756866
PA2696_WGRTCWTCGVC	PA0475_SCTCGNCGDYSWYSTBGTCG	0.634143
PA2704_TGGCCDBSBCGATCC	PA0475_SCTCGNCGDYSWYSTBGTCG	0.573628
PA2718_WWWADATNYHAWWWAWDMAT	PA0475_SCTCGNCGDYSWYSTBGTCG	0.155207
PA2766_ATDNATTWWDARMATWTWWW	PA0475_SCTCGNCGDYSWYSTBGTCG	0.200124
PA2848_CTGHTSDDCRHCVHS	PA0475_SCTCGNCGDYSWYSTBGTCG	0.658897
PA2917_TSRASGAMVWGBYSRWGSMG	PA0475_SCTCGNCGDYSWYSTBGTCG	0.841919
PA2930_WATAGGRMAATTCCYAWWKW	PA0475_SCTCGNCGDYSWYSTBGTCG	0.29207
PA2957_TCVASCAGTTC	PA0475_SCTCGNCGDYSWYSTBGTCG	0.78419
PA3027_AATDAAAAANAATAA	PA0475_SCTCGNCGDYSWYSTBGTCG	0.213454
PA3045_STTGKYGSCGDTGABGTWGT	PA0475_SCTCGNCGDYSWYSTBGTCG	0.738741
PA3094_BSBSCTGBTCGAYCTSSWYG	PA0475_SCTCGNCGDYSWYSTBGTCG	0.636381
PA3122_NGGAATRS	PA0475_SCTCGNCGDYSWYSTBGTCG	0.222901
PA3124_CSATGMYNHSYTGGAATDC	PA0475_SCTCGNCGDYSWYSTBGTCG	0.501728
PA3174_TTGMMCNRSRKCGAC	PA0475_SCTCGNCGDYSWYSTBGTCG	0.655574
PA3215_WWWAAATAHTWKWWAAWHA	PA0475_SCTCGNCGDYSWYSTBGTCG	0.081337
PA3220_TTTWTADTCMTWTBBWTATA	PA0475_SCTCGNCGDYSWYSTBGTCG	0.0829793
PA3260_TTWTTAWTWTYTDTT	PA0475_SCTCGNCGDYSWYSTBGTCG	0.147428
PA3420_TGGCCDBSNYGRWCCY	PA0475_SCTCGNCGDYSWYSTBGTCG	0.540296
PA3433_WYGMBSWTGNCGWTG	PA0475_SCTCGNCGDYSWYSTBGTCG	0.731651
PA3508_TTMAAAAWAAWAAWY	PA0475_SCTCGNCGDYSWYSTBGTCG	0.224094
PA3565_TTTTTATTTTHWMTW	PA0475_SCTCGNCGDYSWYSTBGTCG	0.219266
PA3587_KCRNSNYGYTCATS	PA0475_SCTCGNCGDYSWYSTBGTCG	0.476973
PA3604_TYSNSGDYGWYSTBG	PA0475_SCTCGNCGDYSWYSTBGTCG	0.891227
PA3699_DNAWYGAGAAH	PA0475_SCTCGNCGDYSWYSTBGTCG	0.285667
PA3776_TCGSCCWG	PA0475_SCTCGNCGDYSWYSTBGTCG	0.656021
PA3830_TBSWYGBCGRYCWKS	PA0475_SCTCGNCGDYSWYSTBGTCG	0.818859
PA3845_WWWAAHDDWTWTTTDYWWWW	PA0475_SCTCGNCGDYSWYSTBGTCG	0.0363733
PA3927_CAWCGWSAWSRCSMTSDMCG	PA0475_SCTCGNCGDYSWYSTBGTCG	0.798329
PA3965_WHCGAAAS	PA0475_SCTCGNCGDYSWYSTBGTCG	0.34587
PA3973_CVWCGSCGASCWGRYCBDCR	PA0475_SCTCGNCGDYSWYSTBGTCG	0.637259
PA4070_AWDRMAWAWDAAAAA	PA0475_SCTCGNCGDYSWYSTBGTCG	0.194029
PA4094_CSAGCAGCAGS	PA0475_SCTCGNCGDYSWYSTBGTCG	0.429788
PA4145_TKAWTYAAAAABAWTWWTT	PA0475_SCTCGNCGDYSWYSTBGTCG	0.0996842
PA4157_YSDBGNYSAKCAGSWYGA	PA0475_SCTCGNCGDYSWYSTBGTCG	0.724771
PA4165_YSKYSTYGVYCAKSWHGBGS	PA0475_SCTCGNCGDYSWYSTBGTCG	0.707866
PA0034_CWKGNSSWSCWMGYSSTHGA	PA0527_WDWWWAWYYTYTAMWWRMAW	0.132691
PA0056_TYSRCSHGSDCCDBS	PA0527_WDWWWAWYYTYTAMWWRMAW	0.111137
PA0155_GSTTTCGA	PA0527_WDWWWAWYYTYTAMWWRMAW	0.406092
PA0163_WYGTCGVYGANCWSS	PA0527_WDWWWAWYYTYTAMWWRMAW	0.128206
PA0167_ARSAKSADCAGGWHG	PA0527_WDWWWAWYYTYTAMWWRMAW	0.215009
PA0207_ARAAAAAAWYTTTGA	PA0527_WDWWWAWYYTYTAMWWRMAW	0.784905
PA0217_TMAWHWATAWRAAYAADHAA	PA0527_WDWWWAWYYTYTAMWWRMAW	0.626098
PA0218_CTGCTCGSCGH	PA0527_WDWWWAWYYTYTAMWWRMAW	0.177827
PA0233_YCCTGSTGSTGATCS	PA0527_WDWWWAWYYTYTAMWWRMAW	0.0742197
PA0243_MCSVACCAGKTCGWYCABS	PA0527_WDWWWAWYYTYTAMWWRMAW	0.146562
PA0279_GCTCTACCAACTGAGCTAY	PA0527_WDWWWAWYYTYTAMWWRMAW	0.348009
PA0306_WTTGAAAATMAATA	PA0527_WDWWWAWYYTYTAMWWRMAW	0.705482
PA0367_TGAAYRSCDTTYNS	PA0527_WDWWWAWYYTYTAMWWRMAW	0.28893
PA0403_TATAATSNSCGSYTTTHTTB	PA0527_WDWWWAWYYTYTAMWWRMAW	0.511523
PA0448_WGSTGCTS	PA0527_WDWWWAWYYTYTAMWWRMAW	0.221297
PA0475_SCTCGNCGDYSWYSTBGTCG	PA0527_WDWWWAWYYTYTAMWWRMAW	0.12415
PA0533_CTGSTSGVCVWSGBC	PA0527_WDWWWAWYYTYTAMWWRMAW	0.0497905
PA0701_AATAVAAAATAAWWA	PA0527_WDWWWAWYYTYTAMWWRMAW	0.687223
PA0756_MTSGBCCWGKKCCWGCAGGW	PA0527_WDWWWAWYYTYTAMWWRMAW	0.270524
PA0797_TGSYGSCGSTGVWSG	PA0527_WDWWWAWYYTYTAMWWRMAW	0.0191676
PA0815_SNCSWYCAGCASSDCGRTSW	PA0527_WDWWWAWYYTYTAMWWRMAW	0.0586685
PA0816_MTWRWTATTTTTWWTBWATT	PA0527_WDWWWAWYYTYTAMWWRMAW	0.738948
PA0831_TGGCCGRVHWSGACC	PA0527_WDWWWAWYYTYTAMWWRMAW	0.263237
PA0873_WAANWWTDMAHAAAAMAAWT	PA0527_WDWWWAWYYTYTAMWWRMAW	0.705145
PA0876_RWAWNAAWAAATWMWWAAWA	PA0527_WDWWWAWYYTYTAMWWRMAW	0.703989
PA0893_GCGACATC	PA0527_WDWWWAWYYTYTAMWWRMAW	0.236807
PA0942_WSCGSRTCGACASCR	PA0527_WDWWWAWYYTYTAMWWRMAW	0.0639768
PA1015_CSBGAATGSCRTTCA	PA0527_WDWWWAWYYTYTAMWWRMAW	0.271067
PA1136_AWTAAAAAWAAWTAWTHAWW	PA0527_WDWWWAWYYTYTAMWWRMAW	0.763842
PA1157_WATDTTTTTTATWKATWTTT	PA0527_WDWWWAWYYTYTAMWWRMAW	0.742237
PA1182_SHSSHGSTGMTCGVC	PA0527_WDWWWAWYYTYTAMWWRMAW	0.0338783
PA1184_WTWTTTTTWATTHATWKTTW	PA0527_WDWWWAWYYTYTAMWWRMAW	0.750014
PA1229_SWYGDYCWYGBCGRT	PA0527_WDWWWAWYYTYTAMWWRMAW	0.213094
PA1261_AAWAVAAWWTAAAAA	PA0527_WDWWWAWYYTYTAMWWRMAW	0.702506
PA1283_WWWWWTGWATAAAAAHWWTW	PA0527_WDWWWAWYYTYTAMWWRMAW	0.778994
PA1309_TYGKCSWKGKYSWYSASSDY	PA0527_WDWWWAWYYTYTAMWWRMAW	0.130668
PA1347_CRNCRVCWTCRHCR	PA0527_WDWWWAWYYTYTAMWWRMAW	0.082445
PA1403_AHCWACRRCRWCAMC	PA0527_WDWWWAWYYTYTAMWWRMAW	0.397862
PA1504_SCAGGAHGVCCAGGA	PA0527_WDWWWAWYYTYTAMWWRMAW	0.137552
PA1653_RAVHWSGTCAASCTG	PA0527_WDWWWAWYYTYTAMWWRMAW	0.180066
PA1759_AATARAWAWDAAWAA	PA0527_WDWWWAWYYTYTAMWWRMAW	0.71946
PA1836_SWSGTMGAYSWBSDY	PA0527_WDWWWAWYYTYTAMWWRMAW	0.156663
PA1853_SSANSRCCWSGVYGA	PA0527_WDWWWAWYYTYTAMWWRMAW	0.0116205
PA1859_TTTTTRTTWTTWATT	PA0527_WDWWWAWYYTYTAMWWRMAW	0.687943
PA1978_TTGNYGWYCWBGHCG	PA0527_WDWWWAWYYTYTAMWWRMAW	0.203601
PA1998_TGCTCGVC	PA0527_WDWWWAWYYTYTAMWWRMAW	0.247576
PA2010_CTSCTCGSCGNSSNS	PA0527_WDWWWAWYYTYTAMWWRMAW	0.134854
PA2032_SWSGATCWGGYCGANCAGSH	PA0527_WDWWWAWYYTYTAMWWRMAW	0.0706436
PA2047_YGAKCAHCRSCAGSR	PA0527_WDWWWAWYYTYTAMWWRMAW	0.0921244
PA2056_YCRWSSWGDWCRMCS	PA0527_WDWWWAWYYTYTAMWWRMAW	0.204508
PA2096_MWGGHCRACDHCMWS	PA0527_WDWWWAWYYTYTAMWWRMAW	0.18987
PA2123_GRCCKCGTYGATSRCCAYST	PA0527_WDWWWAWYYTYTAMWWRMAW	0.134981
PA2246_WSCBSSASYTCGMCSAS	PA0527_WDWWWAWYYTYTAMWWRMAW	0.0659701
PA2270_WAWYCWAWWHWTYHKYAAAW	PA0527_WDWWWAWYYTYTAMWWRMAW	0.749613
PA2276_WCSTBCTYGADSTYSWYS	PA0527_WDWWWAWYYTYTAMWWRMAW	0.142239
PA2281_TTGDCCWTGTMGADG	PA0527_WDWWWAWYYTYTAMWWRMAW	0.244039
PA2299_CWGGTMGWHCAKGTC	PA0527_WDWWWAWYYTYTAMWWRMAW	0.297664
PA2417_DCGSCGARCAG	PA0527_WDWWWAWYYTYTAMWWRMAW	0.167231
PA2447_WSGNCRMSSWSNYC	PA0527_WDWWWAWYYTYTAMWWRMAW	0.116593
PA2449_HTTMWTWWWTDTTHBTTRTT	PA0527_WDWWWAWYYTYTAMWWRMAW	0.735291
PA2488_WWWAACWTTKAWTWVAAWAT	PA0527_WDWWWAWYYTYTAMWWRMAW	0.711259
PA2547_TCNNCDVCMHSRHCDDCGSC	PA0527_WDWWWAWYYTYTAMWWRMAW	0.183756
PA2551_GAHGRTCRSCA	PA0527_WDWWWAWYYTYTAMWWRMAW	0.159332
PA2556_VTGAKCRNCYHGGACAAS	PA0527_WDWWWAWYYTYTAMWWRMAW	0.114217
PA2601_HCSAGCAGGNYCWGG	PA0527_WDWWWAWYYTYTAMWWRMAW	0.170077
PA2692_WAAAWATDAWTWAARAAWWT	PA0527_WDWWWAWYYTYTAMWWRMAW	0.788982
PA2696_WGRTCWTCGVC	PA0527_WDWWWAWYYTYTAMWWRMAW	0.391448
PA2704_TGGCCDBSBCGATCC	PA0527_WDWWWAWYYTYTAMWWRMAW	0.194344
PA2718_WWWADATNYHAWWWAWDMAT	PA0527_WDWWWAWYYTYTAMWWRMAW	0.729462
PA2766_ATDNATTWWDARMATWTWWW	PA0527_WDWWWAWYYTYTAMWWRMAW	0.771274
PA2848_CTGHTSDDCRHCVHS	PA0527_WDWWWAWYYTYTAMWWRMAW	0.205407
PA2917_TSRASGAMVWGBYSRWGSMG	PA0527_WDWWWAWYYTYTAMWWRMAW	0.186723
PA2930_WATAGGRMAATTCCYAWWKW	PA0527_WDWWWAWYYTYTAMWWRMAW	0.393997
PA2957_TCVASCAGTTC	PA0527_WDWWWAWYYTYTAMWWRMAW	0.166394
PA3027_AATDAAAAANAATAA	PA0527_WDWWWAWYYTYTAMWWRMAW	0.751464
PA3045_STTGKYGSCGDTGABGTWGT	PA0527_WDWWWAWYYTYTAMWWRMAW	0.216133
PA3094_BSBSCTGBTCGAYCTSSWYG	PA0527_WDWWWAWYYTYTAMWWRMAW	0.204574
PA3122_NGGAATRS	PA0527_WDWWWAWYYTYTAMWWRMAW	0.35099
PA3124_CSATGMYNHSYTGGAATDC	PA0527_WDWWWAWYYTYTAMWWRMAW	0.282626
PA3174_TTGMMCNRSRKCGAC	PA0527_WDWWWAWYYTYTAMWWRMAW	0.348178
PA3215_WWWAAATAHTWKWWAAWHA	PA0527_WDWWWAWYYTYTAMWWRMAW	0.775145
PA3220_TTTWTADTCMTWTBBWTATA	PA0527_WDWWWAWYYTYTAMWWRMAW	0.7521
PA3260_TTWTTAWTWTYTDTT	PA0527_WDWWWAWYYTYTAMWWRMAW	0.709429
PA3420_TGGCCDBSNYGRWCCY	PA0527_WDWWWAWYYTYTAMWWRMAW	0.172714
PA3433_WYGMBSWTGNCGWTG	PA0527_WDWWWAWYYTYTAMWWRMAW	0.271011
PA3508_TTMAAAAWAAWAAWY	PA0527_WDWWWAWYYTYTAMWWRMAW	0.750046
PA3565_TTTTTATTTTHWMTW	PA0527_WDWWWAWYYTYTAMWWRMAW	0.685828
PA3587_KCRNSNYGYTCATS	PA0527_WDWWWAWYYTYTAMWWRMAW	0.314909
PA3604_TYSNSGDYGWYSTBG	PA0527_WDWWWAWYYTYTAMWWRMAW	0.197394
PA3699_DNAWYGAGAAH	PA0527_WDWWWAWYYTYTAMWWRMAW	0.429512
PA3776_TCGSCCWG	PA0527_WDWWWAWYYTYTAMWWRMAW	0.138591
PA3830_TBSWYGBCGRYCWKS	PA0527_WDWWWAWYYTYTAMWWRMAW	0.138522
PA3845_WWWAAHDDWTWTTTDYWWWW	PA0527_WDWWWAWYYTYTAMWWRMAW	0.744306
PA3927_CAWCGWSAWSRCSMTSDMCG	PA0527_WDWWWAWYYTYTAMWWRMAW	0.211365
PA3965_WHCGAAAS	PA0527_WDWWWAWYYTYTAMWWRMAW	0.360956
PA3973_CVWCGSCGASCWGRYCBDCR	PA0527_WDWWWAWYYTYTAMWWRMAW	0.101124
PA4070_AWDRMAWAWDAAAAA	PA0527_WDWWWAWYYTYTAMWWRMAW	0.773779
PA4094_CSAGCAGCAGS	PA0527_WDWWWAWYYTYTAMWWRMAW	0.159014
PA4145_TKAWTYAAAAABAWTWWTT	PA0527_WDWWWAWYYTYTAMWWRMAW	0.765462
PA4157_YSDBGNYSAKCAGSWYGA	PA0527_WDWWWAWYYTYTAMWWRMAW	0.128877
PA4165_YSKYSTYGVYCAKSWHGBGS	PA0527_WDWWWAWYYTYTAMWWRMAW	0.120172
PA0034_CWKGNSSWSCWMGYSSTHGA	PA0533_CTGSTSGVCVWSGBC	0.713187
PA0056_TYSRCSHGSDCCDBS	PA0533_CTGSTSGVCVWSGBC	0.624921
PA0155_GSTTTCGA	PA0533_CTGSTSGVCVWSGBC	0.229964
PA0163_WYGTCGVYGANCWSS	PA0533_CTGSTSGVCVWSGBC	0.542574
PA0167_ARSAKSADCAGGWHG	PA0533_CTGSTSGVCVWSGBC	0.473929
PA0207_ARAAAAAAWYTTTGA	PA0533_CTGSTSGVCVWSGBC	0.0959046
PA0217_TMAWHWATAWRAAYAADHAA	PA0533_CTGSTSGVCVWSGBC	0.0414986
PA0218_CTGCTCGSCGH	PA0533_CTGSTSGVCVWSGBC	0.831919
PA0233_YCCTGSTGSTGATCS	PA0533_CTGSTSGVCVWSGBC	0.744307
PA0243_MCSVACCAGKTCGWYCABS	PA0533_CTGSTSGVCVWSGBC	0.578506
PA0279_GCTCTACCAACTGAGCTAY	PA0533_CTGSTSGVCVWSGBC	0.356433
PA0306_WTTGAAAATMAATA	PA0533_CTGSTSGVCVWSGBC	0.000844415
PA0367_TGAAYRSCDTTYNS	PA0533_CTGSTSGVCVWSGBC	0.443122
PA0403_TATAATSNSCGSYTTTHTTB	PA0533_CTGSTSGVCVWSGBC	0.156477
PA0448_WGSTGCTS	PA0533_CTGSTSGVCVWSGBC	0.934674
PA0475_SCTCGNCGDYSWYSTBGTCG	PA0533_CTGSTSGVCVWSGBC	0.739122
PA0527_WDWWWAWYYTYTAMWWRMAW	PA0533_CTGSTSGVCVWSGBC	0.0497905
PA0601_CCAGCRCCWGS	PA0533_CTGSTSGVCVWSGBC	0.697086
PA0756_MTSGBCCWGKKCCWGCAGGW	PA0533_CTGSTSGVCVWSGBC	0.817124
PA0797_TGSYGSCGSTGVWSG	PA0533_CTGSTSGVCVWSGBC	0.886608
PA0815_SNCSWYCAGCASSDCGRTSW	PA0533_CTGSTSGVCVWSGBC	0.781238
PA0831_TGGCCGRVHWSGACC	PA0533_CTGSTSGVCVWSGBC	0.470148
PA0893_GCGACATC	PA0533_CTGSTSGVCVWSGBC	0.45424
PA0942_WSCGSRTCGACASCR	PA0533_CTGSTSGVCVWSGBC	0.461084
PA1015_CSBGAATGSCRTTCA	PA0533_CTGSTSGVCVWSGBC	0.379541
PA1182_SHSSHGSTGMTCGVC	PA0533_CTGSTSGVCVWSGBC	0.943301
PA1229_SWYGDYCWYGBCGRT	PA0533_CTGSTSGVCVWSGBC	0.581296
PA1309_TYGKCSWKGKYSWYSASSDY	PA0533_CTGSTSGVCVWSGBC	0.649656
PA1347_CRNCRVCWTCRHCR	PA0533_CTGSTSGVCVWSGBC	0.475991
PA1403_AHCWACRRCRWCAMC	PA0533_CTGSTSGVCVWSGBC	0.342818
PA1504_SCAGGAHGVCCAGGA	PA0533_CTGSTSGVCVWSGBC	0.685695
PA1653_RAVHWSGTCAASCTG	PA0533_CTGSTSGVCVWSGBC	0.708233
PA1836_SWSGTMGAYSWBSDY	PA0533_CTGSTSGVCVWSGBC	0.799389
PA1853_SSANSRCCWSGVYGA	PA0533_CTGSTSGVCVWSGBC	0.835159
PA1978_TTGNYGWYCWBGHCG	PA0533_CTGSTSGVCVWSGBC	0.64263
PA1998_TGCTCGVC	PA0533_CTGSTSGVCVWSGBC	0.891621
PA2010_CTSCTCGSCGNSSNS	PA0533_CTGSTSGVCVWSGBC	0.765478
PA2032_SWSGATCWGGYCGANCAGSH	PA0533_CTGSTSGVCVWSGBC	0.740738
PA2047_YGAKCAHCRSCAGSR	PA0533_CTGSTSGVCVWSGBC	0.672882
PA2056_YCRWSSWGDWCRMCS	PA0533_CTGSTSGVCVWSGBC	0.560196
PA2096_MWGGHCRACDHCMWS	PA0533_CTGSTSGVCVWSGBC	0.648236
PA2123_GRCCKCGTYGATSRCCAYST	PA0533_CTGSTSGVCVWSGBC	0.602323
PA2246_WSCBSSASYTCGMCSAS	PA0533_CTGSTSGVCVWSGBC	0.616964
PA2270_WAWYCWAWWHWTYHKYAAAW	PA0533_CTGSTSGVCVWSGBC	0.0304794
PA2276_WCSTBCTYGADSTYSWYS	PA0533_CTGSTSGVCVWSGBC	0.48044
PA2281_TTGDCCWTGTMGADG	PA0533_CTGSTSGVCVWSGBC	0.566428
PA2299_CWGGTMGWHCAKGTC	PA0533_CTGSTSGVCVWSGBC	0.727206
PA2417_DCGSCGARCAG	PA0533_CTGSTSGVCVWSGBC	0.85193
PA2447_WSGNCRMSSWSNYC	PA0533_CTGSTSGVCVWSGBC	0.781621
PA2449_HTTMWTWWWTDTTHBTTRTT	PA0533_CTGSTSGVCVWSGBC	0.00302743
PA2547_TCNNCDVCMHSRHCDDCGSC	PA0533_CTGSTSGVCVWSGBC	0.60698
PA2551_GAHGRTCRSCA	PA0533_CTGSTSGVCVWSGBC	0.472969
PA2556_VTGAKCRNCYHGGACAAS	PA0533_CTGSTSGVCVWSGBC	0.55635
PA2601_HCSAGCAGGNYCWGG	PA0533_CTGSTSGVCVWSGBC	0.775638
PA2696_WGRTCWTCGVC	PA0533_CTGSTSGVCVWSGBC	0.433139
PA2704_TGGCCDBSBCGATCC	PA0533_CTGSTSGVCVWSGBC	0.581753
PA2718_WWWADATNYHAWWWAWDMAT	PA0533_CTGSTSGVCVWSGBC	0.0489586
PA2766_ATDNATTWWDARMATWTWWW	PA0533_CTGSTSGVCVWSGBC	0.115329
PA2848_CTGHTSDDCRHCVHS	PA0533_CTGSTSGVCVWSGBC	0.631819
PA2917_TSRASGAMVWGBYSRWGSMG	PA0533_CTGSTSGVCVWSGBC	0.652616
PA2930_WATAGGRMAATTCCYAWWKW	PA0533_CTGSTSGVCVWSGBC	0.0842131
PA2957_TCVASCAGTTC	PA0533_CTGSTSGVCVWSGBC	0.800612
PA3045_STTGKYGSCGDTGABGTWGT	PA0533_CTGSTSGVCVWSGBC	0.439727
PA3094_BSBSCTGBTCGAYCTSSWYG	PA0533_CTGSTSGVCVWSGBC	0.829395
PA3122_NGGAATRS	PA0533_CTGSTSGVCVWSGBC	0.234649
PA3124_CSATGMYNHSYTGGAATDC	PA0533_CTGSTSGVCVWSGBC	0.583407
PA3174_TTGMMCNRSRKCGAC	PA0533_CTGSTSGVCVWSGBC	0.472909
PA3420_TGGCCDBSNYGRWCCY	PA0533_CTGSTSGVCVWSGBC	0.511636
PA3433_WYGMBSWTGNCGWTG	PA0533_CTGSTSGVCVWSGBC	0.527085
PA3508_TTMAAAAWAAWAAWY	PA0533_CTGSTSGVCVWSGBC	0.0702429
PA3587_KCRNSNYGYTCATS	PA0533_CTGSTSGVCVWSGBC	0.400224
PA3604_TYSNSGDYGWYSTBG	PA0533_CTGSTSGVCVWSGBC	0.632641
PA3699_DNAWYGAGAAH	PA0533_CTGSTSGVCVWSGBC	0.195938
PA3776_TCGSCCWG	PA0533_CTGSTSGVCVWSGBC	0.834407
PA3830_TBSWYGBCGRYCWKS	PA0533_CTGSTSGVCVWSGBC	0.74774
PA3927_CAWCGWSAWSRCSMTSDMCG	PA0533_CTGSTSGVCVWSGBC	0.430404
PA3965_WHCGAAAS	PA0533_CTGSTSGVCVWSGBC	0.225006
PA3973_CVWCGSCGASCWGRYCBDCR	PA0533_CTGSTSGVCVWSGBC	0.862952
PA4094_CSAGCAGCAGS	PA0533_CTGSTSGVCVWSGBC	0.918923
PA4157_YSDBGNYSAKCAGSWYGA	PA0533_CTGSTSGVCVWSGBC	0.753343
PA4165_YSKYSTYGVYCAKSWHGBGS	PA0533_CTGSTSGVCVWSGBC	0.559765
PA0034_CWKGNSSWSCWMGYSSTHGA	PA0601_CCAGCRCCWGS	0.659886
PA0056_TYSRCSHGSDCCDBS	PA0601_CCAGCRCCWGS	0.809178
PA0155_GSTTTCGA	PA0601_CCAGCRCCWGS	0.352872
PA0163_WYGTCGVYGANCWSS	PA0601_CCAGCRCCWGS	0.52364
PA0167_ARSAKSADCAGGWHG	PA0601_CCAGCRCCWGS	0.593291
PA0207_ARAAAAAAWYTTTGA	PA0601_CCAGCRCCWGS	0.0686145
PA0217_TMAWHWATAWRAAYAADHAA	PA0601_CCAGCRCCWGS	0.0599165
PA0218_CTGCTCGSCGH	PA0601_CCAGCRCCWGS	0.58378
PA0233_YCCTGSTGSTGATCS	PA0601_CCAGCRCCWGS	0.7064
PA0243_MCSVACCAGKTCGWYCABS	PA0601_CCAGCRCCWGS	0.478818
PA0279_GCTCTACCAACTGAGCTAY	PA0601_CCAGCRCCWGS	0.429753
PA0367_TGAAYRSCDTTYNS	PA0601_CCAGCRCCWGS	0.32418
PA0403_TATAATSNSCGSYTTTHTTB	PA0601_CCAGCRCCWGS	0.306453
PA0448_WGSTGCTS	PA0601_CCAGCRCCWGS	0.802064
PA0475_SCTCGNCGDYSWYSTBGTCG	PA0601_CCAGCRCCWGS	0.434426
PA0533_CTGSTSGVCVWSGBC	PA0601_CCAGCRCCWGS	0.697086
PA0701_AATAVAAAATAAWWA	PA0601_CCAGCRCCWGS	0.11212
PA0756_MTSGBCCWGKKCCWGCAGGW	PA0601_CCAGCRCCWGS	0.728441
PA0797_TGSYGSCGSTGVWSG	PA0601_CCAGCRCCWGS	0.842933
PA0815_SNCSWYCAGCASSDCGRTSW	PA0601_CCAGCRCCWGS	0.690622
PA0816_MTWRWTATTTTTWWTBWATT	PA0601_CCAGCRCCWGS	0.033201
PA0831_TGGCCGRVHWSGACC	PA0601_CCAGCRCCWGS	0.367095
PA0893_GCGACATC	PA0601_CCAGCRCCWGS	0.518378
PA0942_WSCGSRTCGACASCR	PA0601_CCAGCRCCWGS	0.624572
PA1015_CSBGAATGSCRTTCA	PA0601_CCAGCRCCWGS	0.307701
PA1182_SHSSHGSTGMTCGVC	PA0601_CCAGCRCCWGS	0.736874
PA1229_SWYGDYCWYGBCGRT	PA0601_CCAGCRCCWGS	0.548836
PA1261_AAWAVAAWWTAAAAA	PA0601_CCAGCRCCWGS	0.0523173
PA1309_TYGKCSWKGKYSWYSASSDY	PA0601_CCAGCRCCWGS	0.59043
PA1347_CRNCRVCWTCRHCR	PA0601_CCAGCRCCWGS	0.558749
PA1403_AHCWACRRCRWCAMC	PA0601_CCAGCRCCWGS	0.441295
PA1504_SCAGGAHGVCCAGGA	PA0601_CCAGCRCCWGS	0.682396
PA1653_RAVHWSGTCAASCTG	PA0601_CCAGCRCCWGS	0.495202
PA1759_AATARAWAWDAAWAA	PA0601_CCAGCRCCWGS	0.0389843
PA1836_SWSGTMGAYSWBSDY	PA0601_CCAGCRCCWGS	0.598752
PA1853_SSANSRCCWSGVYGA	PA0601_CCAGCRCCWGS	0.812879
PA1859_TTTTTRTTWTTWATT	PA0601_CCAGCRCCWGS	0.000425535
PA1978_TTGNYGWYCWBGHCG	PA0601_CCAGCRCCWGS	0.559715
PA1998_TGCTCGVC	PA0601_CCAGCRCCWGS	0.664394
PA2010_CTSCTCGSCGNSSNS	PA0601_CCAGCRCCWGS	0.552082
PA2032_SWSGATCWGGYCGANCAGSH	PA0601_CCAGCRCCWGS	0.607095
PA2047_YGAKCAHCRSCAGSR	PA0601_CCAGCRCCWGS	0.857068
PA2056_YCRWSSWGDWCRMCS	PA0601_CCAGCRCCWGS	0.51761
PA2096_MWGGHCRACDHCMWS	PA0601_CCAGCRCCWGS	0.419451
PA2123_GRCCKCGTYGATSRCCAYST	PA0601_CCAGCRCCWGS	0.620082
PA2246_WSCBSSASYTCGMCSAS	PA0601_CCAGCRCCWGS	0.604492
PA2270_WAWYCWAWWHWTYHKYAAAW	PA0601_CCAGCRCCWGS	0.159622
PA2276_WCSTBCTYGADSTYSWYS	PA0601_CCAGCRCCWGS	0.565608
PA2281_TTGDCCWTGTMGADG	PA0601_CCAGCRCCWGS	0.464532
PA2299_CWGGTMGWHCAKGTC	PA0601_CCAGCRCCWGS	0.375728
PA2417_DCGSCGARCAG	PA0601_CCAGCRCCWGS	0.586923
PA2447_WSGNCRMSSWSNYC	PA0601_CCAGCRCCWGS	0.491436
PA2449_HTTMWTWWWTDTTHBTTRTT	PA0601_CCAGCRCCWGS	0.103681
PA2547_TCNNCDVCMHSRHCDDCGSC	PA0601_CCAGCRCCWGS	0.742123
PA2551_GAHGRTCRSCA	PA0601_CCAGCRCCWGS	0.541409
PA2556_VTGAKCRNCYHGGACAAS	PA0601_CCAGCRCCWGS	0.509738
PA2601_HCSAGCAGGNYCWGG	PA0601_CCAGCRCCWGS	0.723391
PA2696_WGRTCWTCGVC	PA0601_CCAGCRCCWGS	0.527226
PA2704_TGGCCDBSBCGATCC	PA0601_CCAGCRCCWGS	0.589061
PA2848_CTGHTSDDCRHCVHS	PA0601_CCAGCRCCWGS	0.586555
PA2917_TSRASGAMVWGBYSRWGSMG	PA0601_CCAGCRCCWGS	0.647445
PA2930_WATAGGRMAATTCCYAWWKW	PA0601_CCAGCRCCWGS	0.19865
PA2957_TCVASCAGTTC	PA0601_CCAGCRCCWGS	0.555918
PA3027_AATDAAAAANAATAA	PA0601_CCAGCRCCWGS	0.0156592
PA3045_STTGKYGSCGDTGABGTWGT	PA0601_CCAGCRCCWGS	0.510176
PA3094_BSBSCTGBTCGAYCTSSWYG	PA0601_CCAGCRCCWGS	0.571497
PA3122_NGGAATRS	PA0601_CCAGCRCCWGS	0.286546
PA3124_CSATGMYNHSYTGGAATDC	PA0601_CCAGCRCCWGS	0.424296
PA3174_TTGMMCNRSRKCGAC	PA0601_CCAGCRCCWGS	0.493797
PA3220_TTTWTADTCMTWTBBWTATA	PA0601_CCAGCRCCWGS	0.086406
PA3260_TTWTTAWTWTYTDTT	PA0601_CCAGCRCCWGS	0.00100641
PA3420_TGGCCDBSNYGRWCCY	PA0601_CCAGCRCCWGS	0.5551
PA3433_WYGMBSWTGNCGWTG	PA0601_CCAGCRCCWGS	0.453711
PA3587_KCRNSNYGYTCATS	PA0601_CCAGCRCCWGS	0.498392
PA3604_TYSNSGDYGWYSTBG	PA0601_CCAGCRCCWGS	0.496907
PA3699_DNAWYGAGAAH	PA0601_CCAGCRCCWGS	0.414564
PA3776_TCGSCCWG	PA0601_CCAGCRCCWGS	0.529618
PA3830_TBSWYGBCGRYCWKS	PA0601_CCAGCRCCWGS	0.516882
PA3927_CAWCGWSAWSRCSMTSDMCG	PA0601_CCAGCRCCWGS	0.598023
PA3965_WHCGAAAS	PA0601_CCAGCRCCWGS	0.355786
PA3973_CVWCGSCGASCWGRYCBDCR	PA0601_CCAGCRCCWGS	0.570538
PA4094_CSAGCAGCAGS	PA0601_CCAGCRCCWGS	0.813328
PA4145_TKAWTYAAAAABAWTWWTT	PA0601_CCAGCRCCWGS	0.0227622
PA4157_YSDBGNYSAKCAGSWYGA	PA0601_CCAGCRCCWGS	0.584012
PA4165_YSKYSTYGVYCAKSWHGBGS	PA0601_CCAGCRCCWGS	0.556037
PA0034_CWKGNSSWSCWMGYSSTHGA	PA0701_AATAVAAAATAAWWA	0.252893
PA0056_TYSRCSHGSDCCDBS	PA0701_AATAVAAAATAAWWA	0.276095
PA0155_GSTTTCGA	PA0701_AATAVAAAATAAWWA	0.44695
PA0163_WYGTCGVYGANCWSS	PA0701_AATAVAAAATAAWWA	0.20695
PA0167_ARSAKSADCAGGWHG	PA0701_AATAVAAAATAAWWA	0.313744
PA0207_ARAAAAAAWYTTTGA	PA0701_AATAVAAAATAAWWA	0.688575
PA0217_TMAWHWATAWRAAYAADHAA	PA0701_AATAVAAAATAAWWA	0.879579
PA0218_CTGCTCGSCGH	PA0701_AATAVAAAATAAWWA	0.0242082
PA0233_YCCTGSTGSTGATCS	PA0701_AATAVAAAATAAWWA	0.286191
PA0243_MCSVACCAGKTCGWYCABS	PA0701_AATAVAAAATAAWWA	0.197636
PA0279_GCTCTACCAACTGAGCTAY	PA0701_AATAVAAAATAAWWA	0.30073
PA0306_WTTGAAAATMAATA	PA0701_AATAVAAAATAAWWA	0.806829
PA0367_TGAAYRSCDTTYNS	PA0701_AATAVAAAATAAWWA	0.431124
PA0403_TATAATSNSCGSYTTTHTTB	PA0701_AATAVAAAATAAWWA	0.522851
PA0448_WGSTGCTS	PA0701_AATAVAAAATAAWWA	0.269251
PA0475_SCTCGNCGDYSWYSTBGTCG	PA0701_AATAVAAAATAAWWA	0.129607
PA0527_WDWWWAWYYTYTAMWWRMAW	PA0701_AATAVAAAATAAWWA	0.687223
PA0601_CCAGCRCCWGS	PA0701_AATAVAAAATAAWWA	0.11212
PA0756_MTSGBCCWGKKCCWGCAGGW	PA0701_AATAVAAAATAAWWA	0.215397
PA0797_TGSYGSCGSTGVWSG	PA0701_AATAVAAAATAAWWA	0.141942
PA0815_SNCSWYCAGCASSDCGRTSW	PA0701_AATAVAAAATAAWWA	0.143833
PA0816_MTWRWTATTTTTWWTBWATT	PA0701_AATAVAAAATAAWWA	0.757966
PA0831_TGGCCGRVHWSGACC	PA0701_AATAVAAAATAAWWA	0.205623
PA0873_WAANWWTDMAHAAAAMAAWT	PA0701_AATAVAAAATAAWWA	0.773214
PA0876_RWAWNAAWAAATWMWWAAWA	PA0701_AATAVAAAATAAWWA	0.894839
PA0893_GCGACATC	PA0701_AATAVAAAATAAWWA	0.203642
PA0942_WSCGSRTCGACASCR	PA0701_AATAVAAAATAAWWA	0.277065
PA1015_CSBGAATGSCRTTCA	PA0701_AATAVAAAATAAWWA	0.400303
PA1136_AWTAAAAAWAAWTAWTHAWW	PA0701_AATAVAAAATAAWWA	0.90274
PA1157_WATDTTTTTTATWKATWTTT	PA0701_AATAVAAAATAAWWA	0.786376
PA1182_SHSSHGSTGMTCGVC	PA0701_AATAVAAAATAAWWA	0.100679
PA1184_WTWTTTTTWATTHATWKTTW	PA0701_AATAVAAAATAAWWA	0.838713
PA1229_SWYGDYCWYGBCGRT	PA0701_AATAVAAAATAAWWA	0.230467
PA1261_AAWAVAAWWTAAAAA	PA0701_AATAVAAAATAAWWA	0.920979
PA1283_WWWWWTGWATAAAAAHWWTW	PA0701_AATAVAAAATAAWWA	0.729419
PA1309_TYGKCSWKGKYSWYSASSDY	PA0701_AATAVAAAATAAWWA	0.284843
PA1347_CRNCRVCWTCRHCR	PA0701_AATAVAAAATAAWWA	0.112747
PA1403_AHCWACRRCRWCAMC	PA0701_AATAVAAAATAAWWA	0.351791
PA1504_SCAGGAHGVCCAGGA	PA0701_AATAVAAAATAAWWA	0.121716
PA1653_RAVHWSGTCAASCTG	PA0701_AATAVAAAATAAWWA	0.33579
PA1759_AATARAWAWDAAWAA	PA0701_AATAVAAAATAAWWA	0.929483
PA1836_SWSGTMGAYSWBSDY	PA0701_AATAVAAAATAAWWA	0.191047
PA1853_SSANSRCCWSGVYGA	PA0701_AATAVAAAATAAWWA	0.00726351
PA1859_TTTTTRTTWTTWATT	PA0701_AATAVAAAATAAWWA	0.874985
PA1978_TTGNYGWYCWBGHCG	PA0701_AATAVAAAATAAWWA	0.293216
PA1998_TGCTCGVC	PA0701_AATAVAAAATAAWWA	0.0735579
PA2032_SWSGATCWGGYCGANCAGSH	PA0701_AATAVAAAATAAWWA	0.335319
PA2047_YGAKCAHCRSCAGSR	PA0701_AATAVAAAATAAWWA	0.17366
PA2056_YCRWSSWGDWCRMCS	PA0701_AATAVAAAATAAWWA	0.212575
PA2096_MWGGHCRACDHCMWS	PA0701_AATAVAAAATAAWWA	0.248545
PA2123_GRCCKCGTYGATSRCCAYST	PA0701_AATAVAAAATAAWWA	0.235691
PA2246_WSCBSSASYTCGMCSAS	PA0701_AATAVAAAATAAWWA	0.20049
PA2270_WAWYCWAWWHWTYHKYAAAW	PA0701_AATAVAAAATAAWWA	0.674461
PA2276_WCSTBCTYGADSTYSWYS	PA0701_AATAVAAAATAAWWA	0.259705
PA2281_TTGDCCWTGTMGADG	PA0701_AATAVAAAATAAWWA	0.287198
PA2299_CWGGTMGWHCAKGTC	PA0701_AATAVAAAATAAWWA	0.260425
PA2417_DCGSCGARCAG	PA0701_AATAVAAAATAAWWA	0.0224203
PA2447_WSGNCRMSSWSNYC	PA0701_AATAVAAAATAAWWA	0.117606
PA2449_HTTMWTWWWTDTTHBTTRTT	PA0701_AATAVAAAATAAWWA	0.827281
PA2488_WWWAACWTTKAWTWVAAWAT	PA0701_AATAVAAAATAAWWA	0.838688
PA2547_TCNNCDVCMHSRHCDDCGSC	PA0701_AATAVAAAATAAWWA	0.242965
PA2551_GAHGRTCRSCA	PA0701_AATAVAAAATAAWWA	0.334039
PA2556_VTGAKCRNCYHGGACAAS	PA0701_AATAVAAAATAAWWA	0.242578
PA2601_HCSAGCAGGNYCWGG	PA0701_AATAVAAAATAAWWA	0.241752
PA2692_WAAAWATDAWTWAARAAWWT	PA0701_AATAVAAAATAAWWA	0.789602
PA2696_WGRTCWTCGVC	PA0701_AATAVAAAATAAWWA	0.22812
PA2704_TGGCCDBSBCGATCC	PA0701_AATAVAAAATAAWWA	0.0715898
PA2718_WWWADATNYHAWWWAWDMAT	PA0701_AATAVAAAATAAWWA	0.69231
PA2766_ATDNATTWWDARMATWTWWW	PA0701_AATAVAAAATAAWWA	0.773946
PA2848_CTGHTSDDCRHCVHS	PA0701_AATAVAAAATAAWWA	0.162563
PA2917_TSRASGAMVWGBYSRWGSMG	PA0701_AATAVAAAATAAWWA	0.163847
PA2930_WATAGGRMAATTCCYAWWKW	PA0701_AATAVAAAATAAWWA	0.506328
PA2957_TCVASCAGTTC	PA0701_AATAVAAAATAAWWA	0.233056
PA3027_AATDAAAAANAATAA	PA0701_AATAVAAAATAAWWA	0.754089
PA3045_STTGKYGSCGDTGABGTWGT	PA0701_AATAVAAAATAAWWA	0.296514
PA3094_BSBSCTGBTCGAYCTSSWYG	PA0701_AATAVAAAATAAWWA	0.27418
PA3122_NGGAATRS	PA0701_AATAVAAAATAAWWA	0.457452
PA3124_CSATGMYNHSYTGGAATDC	PA0701_AATAVAAAATAAWWA	0.241714
PA3174_TTGMMCNRSRKCGAC	PA0701_AATAVAAAATAAWWA	0.334391
PA3215_WWWAAATAHTWKWWAAWHA	PA0701_AATAVAAAATAAWWA	0.772553
PA3220_TTTWTADTCMTWTBBWTATA	PA0701_AATAVAAAATAAWWA	0.747722
PA3260_TTWTTAWTWTYTDTT	PA0701_AATAVAAAATAAWWA	0.909814
PA3420_TGGCCDBSNYGRWCCY	PA0701_AATAVAAAATAAWWA	0.0923197
PA3433_WYGMBSWTGNCGWTG	PA0701_AATAVAAAATAAWWA	0.260009
PA3508_TTMAAAAWAAWAAWY	PA0701_AATAVAAAATAAWWA	0.813349
PA3565_TTTTTATTTTHWMTW	PA0701_AATAVAAAATAAWWA	0.855368
PA3587_KCRNSNYGYTCATS	PA0701_AATAVAAAATAAWWA	0.31294
PA3604_TYSNSGDYGWYSTBG	PA0701_AATAVAAAATAAWWA	0.229729
PA3699_DNAWYGAGAAH	PA0701_AATAVAAAATAAWWA	0.562777
PA3776_TCGSCCWG	PA0701_AATAVAAAATAAWWA	0.126148
PA3830_TBSWYGBCGRYCWKS	PA0701_AATAVAAAATAAWWA	0.32109
PA3845_WWWAAHDDWTWTTTDYWWWW	PA0701_AATAVAAAATAAWWA	0.717053
PA3927_CAWCGWSAWSRCSMTSDMCG	PA0701_AATAVAAAATAAWWA	0.234329
PA3965_WHCGAAAS	PA0701_AATAVAAAATAAWWA	0.492634
PA3973_CVWCGSCGASCWGRYCBDCR	PA0701_AATAVAAAATAAWWA	0.041706
PA4070_AWDRMAWAWDAAAAA	PA0701_AATAVAAAATAAWWA	0.80465
PA4094_CSAGCAGCAGS	PA0701_AATAVAAAATAAWWA	0.275061
PA4145_TKAWTYAAAAABAWTWWTT	PA0701_AATAVAAAATAAWWA	0.809637
PA4157_YSDBGNYSAKCAGSWYGA	PA0701_AATAVAAAATAAWWA	0.18993
PA4165_YSKYSTYGVYCAKSWHGBGS	PA0701_AATAVAAAATAAWWA	0.142051
PA0034_CWKGNSSWSCWMGYSSTHGA	PA0756_MTSGBCCWGKKCCWGCAGGW	0.775072
PA0056_TYSRCSHGSDCCDBS	PA0756_MTSGBCCWGKKCCWGCAGGW	0.605118
PA0155_GSTTTCGA	PA0756_MTSGBCCWGKKCCWGCAGGW	0.193871
[truncated: 8,266 more rows]
