# Supplementary material for: Global transcription factors analyses reveal hierarchy and synergism of regulatory networks and master virulence regulators in Pseudomonas aeruginosa
Source: eLife. 2026 Apr 16;14:RP103346. doi: 10.7554/eLife.103346 (PMC13086498; doi:10.7554/eLife.103346)
Supplement: Supplementary file 6. [file elife-103346-supp6.xlsx]

## Sheet: Sheet1
Supplementary File6. Co-association network.
Source	Target	co-index
PA5550	PA2312	0.164807
PA0152	PA2312	0.074804
PA3124	PA2312	0.135131
GbdR	PA2312	0.097879
PhoB	PA2312	0.093091
PA3927	PA2312	0.079578
PA2047	PA2312	0.075765
PA2054	PA2312	0.123226
PA4196	PA2312	0.065015
PA4296	PA2312	0.077254
PA2056	PA2312	0.02174
PA2276	PA2312	0.015895
PA4916	PA2312	0.03794
PA1229	PA2312	0.031779
PA2096	PA2312	0.033966
PA4080	PA2312	0.057712
PA2957	PA2312	0.021055
PA0034	PA2312	0.036208
PA0877	PA2312	0.035388
PA2848	PA2312	0.024449
PA3604	PA2312	0.009286
PA3587	PA2312	0.002065
PA4914	PA2312	0.009655
PA2281	PA2312	0.035892
PA1653	PA2312	0.010031
PA3830	PA2312	0.02611
PA2417	PA2312	0.00069
PA2718	PA2312	0.000766
PA0601	PA2312	0.000713
PA0756	PA2312	0.000611
PA0797	PA2312	0.000522
PA0272	PA2312	0.000376
PA2010	PA2312	0.000149
PA5166	PA2312	0.000154
PA0218	PA2312	0.000688
PA1998	PA2312	0.001366
PA0448	PA2312	0.023903
PA1015	PA2312	0.034421
PA0611	PA2312	0.046079
PA0780	PA2312	0.050322
PA1312	PA2312	0.036545
PA2076	PA2312	0.033357
PA3269	PA2312	0.029348
PA4165	PA2312	0.060714
PA1309	PA2312	0.081755
PA1619	PA2312	0.069333
PA1138	PA2312	0.04602
PA2930	PA2312	0.104928
PA3948	PA2312	0.024698
PA2899	PA2312	0.015943
PA3045	PA2312	0.01258
RpoN	PA2312	0.000553
PA1182	PA2312	0.002397
PA3122	PA2312	0.001233
PA3776	PA2312	0.002611
PA0533	PA2312	0.019497
PA2447	PA2312	0.004203
PA0056	PA2312	0.001229
PA3571	PA2312	0.014856
PA2834	PA2312	0.00268
PA5438	PA2312	0.007401
PA5029	PA2312	0.003984
PA1978	PA2312	0.000362
RsaL	PA2312	0.003719
VqsM	PA2312	0.003201
PA3321	PA2312	0.049912
PA5356	PA2312	0.005806
PA3599	PA2312	0.013176
PA4806	PA2312	0.008002
ExsA	PA2312	0.010349
PA1961	PA2312	0.007795
PA0163	PA2312	0.002217
AlgR	PA2312	0.000509
PA4493	PA2312	0.03325
PA0155	PA2312	0.034146
PA3965	PA2312	0.042422
PA2556	PA2312	0.038658
PA3433	PA2312	0.036765
PA0367	PA2312	0.058605
PA3699	PA2312	0.063586
PA2299	PA2312	0.047348
PA3420	PA2312	0.04448
PA0873	PA2312	0.048266
PA4094	PA2312	0.066786
PA0167	PA2312	0.082436
PA2547	PA2312	0.107442
PA5032	PA2312	0.103139
PA5342	PA2312	0.096579
FleQ	PA2312	0.139317
PchR	PA2312	0.124032
PA4185	PA2312	0.180372
PA0707	PA2312	0.222791
PA4885	PA2312	0.211821
PA2704	PA2312	0.086566
PA4341	PA2312	0.097709
PA1285	PA2312	0.093457
PA2246	PA2312	0.057956
PA5382	PA2312	0.097652
PA0893	PA2312	0.050315
PA5218	PA2312	0.054067
PA0279	PA2312	0.040998
PA1347	PA2312	0.091298
PA1836	PA2312	0.06128
PA1283	PA2312	0.054888
PA0876	PA2312	0.044716
PA1136	PA2312	0.043037
PA0942	PA2312	0.053825
PA2551	PA2312	0.05381
PA3845	PA2312	0.051579
PA0217	PA2312	0.059585
PA2449	PA2312	0.058884
PA1157	PA2312	0.064736
PA0233	PA2312	0.062667
PA2032	PA2312	0.069056
PA3973	PA2312	0.149767
SphR	PA2312	0.129955
PA5283	PA2312	0.128145
PA4132	PA2312	0.157977
PA2196	PA2312	0.154015
PA3921	PA2312	0.151876
PA3174	PA2312	0.07976
PA2115	PA2312	0.080008
PA0243	PA2312	0.073531
PA5389	PA2312	0.073143
PA0831	PA2312	0.066248
PA1403	PA2312	0.071933
PA2601	PA2312	0.114721
PA0527	PA2312	0.085843
PA1853	PA2312	0.083393
PA2577	PA2312	0.144131
PA3714	PA2312	0.140758
PA3711	PA2312	0.134487
PA4147	PA2312	0.146504
PA1484	PA2312	0.12735
PA1850	PA2312	0.132815
PA0815	PA2312	0.102029
PA1504	PA2312	0.108408
PA3027	PA2312	0.094171
PA1109	PA2312	0.115555
PA4070	PA2312	0.10566
PA1380	PA2312	0.126275
PA3220	PA2312	0.114272
PA5157	PA2312	0.1214
PA5431	PA2312	0.107719
PA0701	PA2312	0.099225
PA1184	PA2312	0.092287
PA1261	PA2312	0.09745
PA1859	PA2312	0.108128
PA3508	PA2312	0.107046
PA2692	PA2312	0.082087
PA4381	PA2312	0.079528
PA3260	PA2312	0.091772
PA2766	PA2312	0.095664
PA5255	PA2312	0.091572
PA4784	PA2312	0.073938
PA3215	PA2312	0.070044
PA4145	PA2312	0.070951
PA0306	PA2312	0.084617
PA0816	PA2312	0.074974
PA2917	PA2312	0.081177
PA3094	PA2312	0.078461
PA3565	PA2312	0.080087
PA0475	PA2312	0.085115
PA0207	PA2312	0.093158
PA0403	PA2312	0.094223
PA2270	PA2312	0.090419
PA5428	PA2312	0.108324
PA2523	PA2312	0.110429
PA5116	PA2312	0.102281
PA4157	PA2312	0.088565
PA1759	PA2312	0.103671
PA2488	PA2312	0.1017
PA0152	PA5550	0.088098
PA3124	PA5550	0.063645
GbdR	PA5550	0.08401
PhoB	PA5550	0.098904
PA3927	PA5550	0.044387
PA2047	PA5550	0.075953
PA2054	PA5550	0.0945
PA4196	PA5550	0.046065
PA4296	PA5550	0.084117
PA2056	PA5550	0.008296
PA2276	PA5550	0.004666
PA4916	PA5550	0.020315
PA1229	PA5550	0.014203
PA2096	PA5550	0.016923
PA4080	PA5550	0.043583
PA2957	PA5550	0.01118
PA0034	PA5550	0.013395
PA0877	PA5550	0.008575
PA2848	PA5550	0.017963
PA3604	PA5550	0.002939
PA3587	PA5550	0.002089
PA4914	PA5550	0.00449
PA2281	PA5550	0.027137
PA1653	PA5550	0.006683
PA3830	PA5550	0.012819
PA2417	PA5550	0.000432
PA2718	PA5550	0.000638
PA0601	PA5550	0.000265
PA0756	PA5550	0.000338
PA0797	PA5550	0.000275
PA0272	PA5550	0.000376
PA2010	PA5550	0.000574
PA5166	PA5550	0.00012
PA0218	PA5550	0.001692
PA1998	PA5550	0.000414
PA0448	PA5550	0.014725
PA1015	PA5550	0.01479
PA0611	PA5550	0.018534
PA0780	PA5550	0.029687
PA1312	PA5550	0.009896
PA2076	PA5550	0.01382
PA3269	PA5550	0.026772
PA4165	PA5550	0.048332
PA1309	PA5550	0.108898
PA1619	PA5550	0.083232
PA1138	PA5550	0.020701
PA2930	PA5550	0.003744
PA3948	PA5550	0.017288
PA2899	PA5550	0.005274
PA3045	PA5550	0.007793
RpoN	PA5550	0.001577
PA1182	PA5550	0.001953
PA3122	PA5550	0.000314
PA3776	PA5550	0.000708
PA0533	PA5550	0.009
PA2447	PA5550	0.005093
PA0056	PA5550	5.93e-05
PA3571	PA5550	0.007236
PA5438	PA5550	0.001838
RsaL	PA5550	0.022238
VqsM	PA5550	0.018653
PA3321	PA5550	0.039742
PA5356	PA5550	0.006506
PA3599	PA5550	0.006948
PA3932	PA5550	0.006743
PA5525	PA5550	0.004154
PA4806	PA5550	0.009519
PA0163	PA5550	0.006008
VfR	PA5550	0.003805
PA4493	PA5550	0.021084
PA0155	PA5550	0.027845
PA3965	PA5550	0.035026
PA2556	PA5550	0.028344
PA3433	PA5550	0.026983
PA0367	PA5550	0.046424
PA3699	PA5550	0.048968
PA2299	PA5550	0.035096
PA3420	PA5550	0.030786
PA0873	PA5550	0.038007
PA4094	PA5550	0.057874
PA0167	PA5550	0.074516
PA2547	PA5550	0.091277
PA5032	PA5550	0.111915
PA5342	PA5550	0.138492
FleQ	PA5550	0.14242
PchR	PA5550	0.101055
PA4185	PA5550	0.204526
PA0707	PA5550	0.18998
PA4885	PA5550	0.169567
PA2704	PA5550	0.075367
PA4341	PA5550	0.09042
PA1285	PA5550	0.048458
PA2246	PA5550	0.01846
PA5382	PA5550	0.049413
PA0893	PA5550	0.036794
PA5218	PA5550	0.01662
PA0279	PA5550	0.031743
PA1347	PA5550	0.058714
PA1836	PA5550	0.047371
PA1283	PA5550	0.035028
PA0876	PA5550	0.030646
PA1136	PA5550	0.02813
PA0942	PA5550	0.037079
PA2551	PA5550	0.036674
PA3845	PA5550	0.035256
PA0217	PA5550	0.040138
PA2449	PA5550	0.041513
PA1157	PA5550	0.046508
PA0233	PA5550	0.045755
PA2032	PA5550	0.053417
PA3973	PA5550	0.127858
SphR	PA5550	0.119689
PA5283	PA5550	0.099358
PA4132	PA5550	0.135691
PA2196	PA5550	0.124577
PA3921	PA5550	0.115294
PA3174	PA5550	0.056407
PA2115	PA5550	0.059355
PA0243	PA5550	0.059744
PA5389	PA5550	0.054816
PA0831	PA5550	0.050573
PA1403	PA5550	0.056992
PA2601	PA5550	0.084011
PA0527	PA5550	0.068368
PA1853	PA5550	0.063965
PA2577	PA5550	0.113261
PA3714	PA5550	0.105913
PA3711	PA5550	0.099777
PA4147	PA5550	0.115935
PA1484	PA5550	0.102103
PA1850	PA5550	0.10288
PA0815	PA5550	0.079994
PA1504	PA5550	0.081325
PA3027	PA5550	0.06928
PA1109	PA5550	0.087625
PA4070	PA5550	0.077646
PA1380	PA5550	0.091427
PA3220	PA5550	0.083895
PA5157	PA5550	0.086438
PA5431	PA5550	0.077543
PA0701	PA5550	0.075363
PA1184	PA5550	0.065528
PA1261	PA5550	0.068639
PA1859	PA5550	0.076565
PA3508	PA5550	0.075716
PA2692	PA5550	0.056961
PA4381	PA5550	0.055665
PA3260	PA5550	0.064893
PA2766	PA5550	0.065848
PA5255	PA5550	0.064858
PA4784	PA5550	0.054152
PA3215	PA5550	0.048286
PA4145	PA5550	0.048307
PA0306	PA5550	0.059659
PA0816	PA5550	0.053104
PA2917	PA5550	0.05712
PA3094	PA5550	0.055875
PA3565	PA5550	0.056569
PA0475	PA5550	0.055716
PA0207	PA5550	0.06134
PA0403	PA5550	0.064238
PA2270	PA5550	0.06491
PA5428	PA5550	0.08267
PA2523	PA5550	0.087456
PA5116	PA5550	0.075247
PA4157	PA5550	0.067338
PA1759	PA5550	0.078977
PA2488	PA5550	0.07712
PA3124	PA0152	0.049191
GbdR	PA0152	0.057864
PhoB	PA0152	0.069195
PA3927	PA0152	0.058963
PA2047	PA0152	0.069711
PA2054	PA0152	0.083999
PA4196	PA0152	0.061597
PA4296	PA0152	0.051893
PA2056	PA0152	0.086108
PA2276	PA0152	0.04079
PA4916	PA0152	0.041233
PA1229	PA0152	0.0296
PA2096	PA0152	0.034264
PA4080	PA0152	0.1334
PA2957	PA0152	0.06452
PA0034	PA0152	0.048738
PA0877	PA0152	0.121149
PA2848	PA0152	0.025997
PA3604	PA0152	0.005576
PA3587	PA0152	0.009626
PA4914	PA0152	0.017516
PA2281	PA0152	0.031416
PA1653	PA0152	0.017159
PA3830	PA0152	0.023844
PA2417	PA0152	0.000237
PA2718	PA0152	0.000193
PA0601	PA0152	0.000392
PA0756	PA0152	0.000301
PA0797	PA0152	0.000582
PA0272	PA0152	0.000405
PA2010	PA0152	0.000449
PA5166	PA0152	0.000556
PA0218	PA0152	0.000568
PA1998	PA0152	0.000547
PA0448	PA0152	0.008506
PA1015	PA0152	0.008408
PA0611	PA0152	0.018605
PA0780	PA0152	0.015864
PA1312	PA0152	0.004663
PA2076	PA0152	0.010688
PA3269	PA0152	0.019589
PA4165	PA0152	0.055682
PA1309	PA0152	0.07618
PA1619	PA0152	0.121413
PA1138	PA0152	0.011669
PA2930	PA0152	0.04291
PA3948	PA0152	0.001497
RpoN	PA0152	0.001901
PA1182	PA0152	0.000829
PA3122	PA0152	0.00132
MvfR	PA0152	0.002364
GacA	PA0152	0.001289
PA3776	PA0152	0.000586
PA0533	PA0152	0.004214
PA2447	PA0152	0.003717
PA0056	PA0152	0.000991
PA3571	PA0152	0.001975
PA5438	PA0152	0.001673
PA5029	PA0152	0.005184
PA1978	PA0152	0.012165
PA2123	PA0152	0.008918
PA3321	PA0152	0.01245
PA5356	PA0152	0.004492
PA3599	PA0152	0.006296
PA3932	PA0152	0.005131
PA5525	PA0152	0.00529
PA4074	PA0152	0.021325
PA5374	PA0152	0.007057
ExsA	PA0152	0.005427
PA1961	PA0152	0.006733
PA0163	PA0152	0.00445
AlgR	PA0152	0.000936
VfR	PA0152	0.001362
PA4493	PA0152	0.105067
PA0155	PA0152	0.056776
PA3965	PA0152	0.060029
PA2556	PA0152	0.043309
PA3433	PA0152	0.040249
PA0367	PA0152	0.055452
PA3699	PA0152	0.06118
PA2299	PA0152	0.039629
PA3420	PA0152	0.038381
PA0873	PA0152	0.031087
PA4094	PA0152	0.03289
PA0167	PA0152	0.049068
PA2547	PA0152	0.07022
PA5032	PA0152	0.060406
PA5342	PA0152	0.075854
FleQ	PA0152	0.062624
PchR	PA0152	0.063248
PA4185	PA0152	0.132614
PA0707	PA0152	0.210853
PA4885	PA0152	0.090493
PA2704	PA0152	0.101382
PA4341	PA0152	0.068138
PA1285	PA0152	0.080903
PA2246	PA0152	0.029975
PA5382	PA0152	0.051362
PA0893	PA0152	0.037898
PA5218	PA0152	0.045136
PA0279	PA0152	0.06225
PA1347	PA0152	0.058581
PA1836	PA0152	0.053575
PA1283	PA0152	0.043948
PA0876	PA0152	0.042386
PA1136	PA0152	0.041114
PA0942	PA0152	0.056233
PA2551	PA0152	0.052339
PA3845	PA0152	0.05168
PA0217	PA0152	0.057912
PA2449	PA0152	0.054607
PA1157	PA0152	0.059286
PA0233	PA0152	0.060741
PA2032	PA0152	0.079645
PA3973	PA0152	0.08828
SphR	PA0152	0.096203
PA5283	PA0152	0.075438
PA4132	PA0152	0.109614
PA2196	PA0152	0.101728
PA3921	PA0152	0.08799
PA3174	PA0152	0.052182
PA2115	PA0152	0.060205
PA0243	PA0152	0.056075
PA5389	PA0152	0.053822
PA0831	PA0152	0.052481
PA1403	PA0152	0.070458
PA2601	PA0152	0.087375
PA0527	PA0152	0.07877
PA1853	PA0152	0.073503
PA2577	PA0152	0.106674
PA3714	PA0152	0.106824
PA3711	PA0152	0.094611
PA4147	PA0152	0.09941
PA1484	PA0152	0.100619
PA1850	PA0152	0.1011
PA0815	PA0152	0.088084
PA1504	PA0152	0.083799
PA3027	PA0152	0.08606
PA1109	PA0152	0.112292
PA4070	PA0152	0.077807
PA1380	PA0152	0.093245
PA3220	PA0152	0.084229
PA5157	PA0152	0.088954
PA5431	PA0152	0.077742
PA0701	PA0152	0.076148
PA1184	PA0152	0.080464
PA1261	PA0152	0.075793
PA1859	PA0152	0.086114
PA3508	PA0152	0.085927
PA2692	PA0152	0.070963
PA4381	PA0152	0.067391
PA3260	PA0152	0.083706
PA2766	PA0152	0.077255
PA5255	PA0152	0.079239
PA4784	PA0152	0.069308
PA3215	PA0152	0.0632
PA4145	PA0152	0.063761
PA0306	PA0152	0.077719
PA0816	PA0152	0.071801
PA2917	PA0152	0.077759
PA3094	PA0152	0.074535
PA3565	PA0152	0.071369
PA0475	PA0152	0.076438
PA0207	PA0152	0.076907
PA0403	PA0152	0.073199
PA2270	PA0152	0.067704
PA5428	PA0152	0.082381
PA2523	PA0152	0.141806
PA5116	PA0152	0.089626
PA4157	PA0152	0.074559
PA1759	PA0152	0.082411
PA2488	PA0152	0.075721
GbdR	PA3124	0.03158
PhoB	PA3124	0.024298
PA3927	PA3124	0.060116
PA2047	PA3124	0.048746
PA2054	PA3124	0.058927
PA4196	PA3124	0.07046
PA4296	PA3124	0.042761
PA2056	PA3124	0.058332
PA2276	PA3124	0.06036
PA4916	PA3124	0.085801
PA1229	PA3124	0.051441
PA2096	PA3124	0.054774
PA4080	PA3124	0.070259
PA2957	PA3124	0.056954
PA0034	PA3124	0.055179
PA0877	PA3124	0.065901
PA2848	PA3124	0.028129
PA3604	PA3124	0.020814
PA3587	PA3124	0.015502
PA4914	PA3124	0.048312
PA2281	PA3124	0.033775
PA1653	PA3124	0.025466
PA3830	PA3124	0.036466
PA2417	PA3124	0.000365
PA2718	PA3124	0.000402
PA0601	PA3124	0.000943
PA0756	PA3124	0.000693
PA0797	PA3124	0.000782
PA0272	PA3124	0.000893
PA2010	PA3124	0.000199
PA5166	PA3124	0.000651
PA0218	PA3124	0.000861
PA1998	PA3124	0.001057
PA0448	PA3124	0.024524
PA1015	PA3124	0.035889
PA0611	PA3124	0.037972
PA0780	PA3124	0.044287
PA1312	PA3124	0.031007
PA2076	PA3124	0.021791
PA3269	PA3124	0.019465
PA4165	PA3124	0.053949
PA1309	PA3124	0.028233
PA1619	PA3124	0.04626
PA1138	PA3124	0.032508
PA2930	PA3124	0.051463
PA3948	PA3124	0.032723
PA2899	PA3124	0.012738
PA3045	PA3124	0.016703
RpoN	PA3124	0.003879
PA1182	PA3124	0.003968
PA3122	PA3124	0.009754
MvfR	PA3124	9.59e-05
SoxR	PA3124	0.003421
GacA	PA3124	0.000752
PA3776	PA3124	0.003174
PA0533	PA3124	0.018459
PA2447	PA3124	0.003409
PA0056	PA3124	0.000633
PA3571	PA3124	0.008661
PA2834	PA3124	0.00139
PA5438	PA3124	0.003295
PA5029	PA3124	0.013232
PA1978	PA3124	0.016166
CdpR	PA3124	7.39e-05
PA3321	PA3124	0.028329
PA2696	PA3124	0.00317
PA5356	PA3124	0.005095
PA3599	PA3124	0.003009
PA3932	PA3124	0.008771
PA5525	PA3124	0.000288
PA4806	PA3124	0.004082
PA5179	PA3124	0.001752
MexT	PA3124	0.003793
ExsA	PA3124	0.010033
PA1961	PA3124	0.004526
PA0163	PA3124	0.010187
AlgR	PA3124	0.001877
VfR	PA3124	0.003337
PA4493	PA3124	0.057164
PA0155	PA3124	0.046757
PA3965	PA3124	0.047631
PA2556	PA3124	0.052198
PA3433	PA3124	0.062255
PA0367	PA3124	0.064293
PA3699	PA3124	0.073675
PA2299	PA3124	0.05107
PA3420	PA3124	0.047602
PA0873	PA3124	0.037788
PA4094	PA3124	0.036004
PA0167	PA3124	0.043055
PA2547	PA3124	0.06383
PA5032	PA3124	0.056444
PA5342	PA3124	0.045812
FleQ	PA3124	0.053709
PchR	PA3124	0.058547
PA4185	PA3124	0.093465
PA0707	PA3124	0.112338
PA4885	PA3124	0.14755
PA2704	PA3124	0.061321
PA4341	PA3124	0.06764
PA1285	PA3124	0.068121
PA2246	PA3124	0.049792
PA5382	PA3124	0.064629
PA0893	PA3124	0.045412
PA5218	PA3124	0.058786
PA0279	PA3124	0.053986
PA1347	PA3124	0.078206
PA1836	PA3124	0.076242
PA1283	PA3124	0.05413
PA0876	PA3124	0.049479
PA1136	PA3124	0.052341
PA0942	PA3124	0.064425
PA2551	PA3124	0.065742
PA3845	PA3124	0.066516
PA0217	PA3124	0.073942
PA2449	PA3124	0.069884
PA1157	PA3124	0.065942
PA0233	PA3124	0.072316
PA2032	PA3124	0.07627
PA3973	PA3124	0.076131
SphR	PA3124	0.080767
PA5283	PA3124	0.090594
PA4132	PA3124	0.107115
PA2196	PA3124	0.101265
PA3921	PA3124	0.101332
PA3174	PA3124	0.07446
PA2115	PA3124	0.086536
PA0243	PA3124	0.070155
PA5389	PA3124	0.06687
PA0831	PA3124	0.059166
PA1403	PA3124	0.069831
PA2601	PA3124	0.090171
PA0527	PA3124	0.076545
PA1853	PA3124	0.077752
PA2577	PA3124	0.100483
PA3714	PA3124	0.105573
PA3711	PA3124	0.096672
PA4147	PA3124	0.101625
PA1484	PA3124	0.093641
PA1850	PA3124	0.101521
PA0815	PA3124	0.093637
PA1504	PA3124	0.09512
PA3027	PA3124	0.094074
PA1109	PA3124	0.090818
PA4070	PA3124	0.085491
PA1380	PA3124	0.096381
PA3220	PA3124	0.0918
PA5157	PA3124	0.10026
PA5431	PA3124	0.086122
PA0701	PA3124	0.087788
PA1184	PA3124	0.087751
PA1261	PA3124	0.091094
PA1859	PA3124	0.100035
PA3508	PA3124	0.09224
PA2692	PA3124	0.084532
PA4381	PA3124	0.081023
PA3260	PA3124	0.097562
PA2766	PA3124	0.091995
PA5255	PA3124	0.092581
PA4784	PA3124	0.083725
PA3215	PA3124	0.077624
PA4145	PA3124	0.079958
PA0306	PA3124	0.081981
PA0816	PA3124	0.082897
PA2917	PA3124	0.08387
PA3094	PA3124	0.089948
PA3565	PA3124	0.084435
PA0475	PA3124	0.078794
PA0207	PA3124	0.085109
PA0403	PA3124	0.081148
PA2270	PA3124	0.085681
PA5428	PA3124	0.103066
PA2523	PA3124	0.099889
PA5116	PA3124	0.089317
PA4157	PA3124	0.085149
PA1759	PA3124	0.087874
PA2488	PA3124	0.084389
PhoB	GbdR	0.30306
PA3927	GbdR	0.069776
PA2047	GbdR	0.076297
PA2054	GbdR	0.114676
PA4196	GbdR	0.067168
PA4296	GbdR	0.075973
PA2056	GbdR	0.019307
PA2276	GbdR	0.011421
PA4916	GbdR	0.008191
PA1229	GbdR	0.007361
PA2096	GbdR	0.006871
PA4080	GbdR	0.040563
PA2957	GbdR	0.008865
PA0034	GbdR	0.013843
PA0877	GbdR	0.022192
PA2848	GbdR	0.035788
PA3604	GbdR	0.005391
PA3587	GbdR	0.003514
PA4914	GbdR	0.010154
PA2281	GbdR	0.062851
PA1653	GbdR	0.01094
PA3830	GbdR	0.017107
PA2417	GbdR	0.001229
PA2718	GbdR	0.001808
PA0601	GbdR	0.000422
PA0756	GbdR	0.000491
PA0797	GbdR	0.000252
PA0272	GbdR	0.000326
PA5166	GbdR	0.000109
PA0218	GbdR	0.00235
PA1998	GbdR	0.000141
PA0448	GbdR	0.01154
PA1015	GbdR	0.007811
PA0611	GbdR	0.020084
PA0780	GbdR	0.0176
PA1312	GbdR	0.004524
PA2076	GbdR	0.003497
PA3269	GbdR	0.0018
PA4165	GbdR	0.005668
PA1309	GbdR	0.044149
PA1619	GbdR	0.066741
PA1138	GbdR	0.022373
PA2930	GbdR	0.014207
PA3948	GbdR	0.012814
RpoN	GbdR	0.00232
PA1182	GbdR	0.000539
PA3122	GbdR	0.001664
PA0533	GbdR	0.005246
PA2447	GbdR	0.014546
PA0056	GbdR	0.001672
PA5438	GbdR	0.007707
PA3321	GbdR	0.003982
PA2696	GbdR	0.00437
PA5356	GbdR	0.019576
PA5525	GbdR	0.008094
PA5179	GbdR	0.001946
PA4174	GbdR	0.005184
PA0163	GbdR	0.003831
VfR	GbdR	0.000749
PA4493	GbdR	0.039383
PA0155	GbdR	0.044984
PA3965	GbdR	0.060296
PA2556	GbdR	0.0497
PA3433	GbdR	0.046578
PA0367	GbdR	0.084203
PA3699	GbdR	0.089412
PA2299	GbdR	0.059718
PA3420	GbdR	0.057314
PA0873	GbdR	0.07046
PA4094	GbdR	0.088335
PA0167	GbdR	0.1167
PA2547	GbdR	0.138656
PA5032	GbdR	0.157529
PA5342	GbdR	0.14564
FleQ	GbdR	0.206081
PchR	GbdR	0.274615
PA4185	GbdR	0.16646
PA0707	GbdR	0.149959
PA4885	GbdR	0.127877
PA2704	GbdR	0.097484
PA4341	GbdR	0.137576
PA1285	GbdR	0.090678
PA2246	GbdR	0.04113
PA5382	GbdR	0.07585
PA0893	GbdR	0.065887
PA5218	GbdR	0.052177
PA0279	GbdR	0.028733
PA1347	GbdR	0.069814
PA1836	GbdR	0.069652
PA1283	GbdR	0.065144
PA0876	GbdR	0.059434
PA1136	GbdR	0.054355
PA0942	GbdR	0.065856
PA2551	GbdR	0.066688
PA3845	GbdR	0.064302
PA0217	GbdR	0.07265
PA2449	GbdR	0.074369
PA1157	GbdR	0.081979
PA0233	GbdR	0.078319
PA2032	GbdR	0.085639
PA3973	GbdR	0.186893
SphR	GbdR	0.24648
PA5283	GbdR	0.152947
PA4132	GbdR	0.165057
PA2196	GbdR	0.175666
PA3921	GbdR	0.169154
PA3174	GbdR	0.093128
PA2115	GbdR	0.08992
PA0243	GbdR	0.085244
PA5389	GbdR	0.082723
PA0831	GbdR	0.091367
PA1403	GbdR	0.102566
PA2601	GbdR	0.142611
PA0527	GbdR	0.122749
PA1853	GbdR	0.114844
PA2577	GbdR	0.169167
PA3714	GbdR	0.170303
PA3711	GbdR	0.159797
PA4147	GbdR	0.181082
PA1484	GbdR	0.169588
PA1850	GbdR	0.166547
PA0815	GbdR	0.12433
PA1504	GbdR	0.1353
PA3027	GbdR	0.120665
PA1109	GbdR	0.150788
PA4070	GbdR	0.132191
PA1380	GbdR	0.143899
PA3220	GbdR	0.140636
PA5157	GbdR	0.142261
PA5431	GbdR	0.136046
PA0701	GbdR	0.124727
PA1184	GbdR	0.114464
PA1261	GbdR	0.118086
PA1859	GbdR	0.128571
PA3508	GbdR	0.132758
PA2692	GbdR	0.102611
PA4381	GbdR	0.098072
PA3260	GbdR	0.111426
PA2766	GbdR	0.116483
PA5255	GbdR	0.111781
PA4784	GbdR	0.091339
PA3215	GbdR	0.086138
PA4145	GbdR	0.085904
PA0306	GbdR	0.105643
PA0816	GbdR	0.092789
PA2917	GbdR	0.103594
PA3094	GbdR	0.097631
PA3565	GbdR	0.098431
PA0475	GbdR	0.091928
PA0207	GbdR	0.106944
PA0403	GbdR	0.1111
PA2270	GbdR	0.103894
PA5428	GbdR	0.12446
PA2523	GbdR	0.137005
PA5116	GbdR	0.12372
PA4157	GbdR	0.111491
PA1759	GbdR	0.13082
PA2488	GbdR	0.129337
PA3927	PhoB	0.06152
PA2047	PhoB	0.070415
PA2054	PhoB	0.114743
PA4196	PhoB	0.052225
PA4296	PhoB	0.081411
PA2056	PhoB	0.014627
PA2276	PhoB	0.008731
PA4916	PhoB	0.00658
PA1229	PhoB	0.009326
PA2096	PhoB	0.007616
PA4080	PhoB	0.037421
PA2957	PhoB	0.006433
PA0034	PhoB	0.011611
PA0877	PhoB	0.026849
PA2848	PhoB	0.026512
PA3604	PhoB	0.003737
PA3587	PhoB	0.003149
PA4914	PhoB	0.009219
PA2281	PhoB	0.046781
PA1653	PhoB	0.008852
PA3830	PhoB	0.015225
PA2417	PhoB	2.87e-05
PA2718	PhoB	0.000129
PA0601	PhoB	0.00011
PA0756	PhoB	3.37e-05
PA2010	PhoB	6.15e-05
PA5166	PhoB	6.99e-05
PA0218	PhoB	0.001825
PA1998	PhoB	0.000346
PA0448	PhoB	0.010771
PA1015	PhoB	0.006341
PA0611	PhoB	0.026743
PA0780	PhoB	0.019872
PA1312	PhoB	0.004365
PA2076	PhoB	0.007666
PA3269	PhoB	0.002862
PA4165	PhoB	0.008166
PA1309	PhoB	0.047439
PA1619	PhoB	0.065865
PA1138	PhoB	0.019663
PA2930	PhoB	0.007693
PA3948	PhoB	0.005257
RpoN	PhoB	0.00168
PA1182	PhoB	0.000398
PA3122	PhoB	0.000602
PA3776	PhoB	0.000639
PA0533	PhoB	0.003876
PA2447	PhoB	0.004223
PA0056	PhoB	0.000328
PA3571	PhoB	0.003092
PA2834	PhoB	0.00208
PA5438	PhoB	0.003144
PA1978	PhoB	0.003392
PA3321	PhoB	0.005014
PA2696	PhoB	0.005385
PA5356	PhoB	0.018691
PA5525	PhoB	0.011741
PA5179	PhoB	0.004841
PA1961	PhoB	0.003521
AlgR	PhoB	0.003067
PA4493	PhoB	0.028066
PA0155	PhoB	0.032275
PA3965	PhoB	0.042577
PA2556	PhoB	0.036577
PA3433	PhoB	0.033202
PA0367	PhoB	0.059873
PA3699	PhoB	0.065818
PA2299	PhoB	0.041835
PA3420	PhoB	0.04117
PA0873	PhoB	0.043654
PA4094	PhoB	0.061998
PA0167	PhoB	0.087983
PA2547	PhoB	0.113745
PA5032	PhoB	0.135641
PA5342	PhoB	0.12341
FleQ	PhoB	0.174624
PchR	PhoB	0.227867
PA4185	PhoB	0.144745
PA0707	PhoB	0.148881
PA4885	PhoB	0.123885
PA2704	PhoB	0.075879
PA4341	PhoB	0.116721
PA1285	PhoB	0.07069
PA2246	PhoB	0.031663
PA5382	PhoB	0.062504
PA0893	PhoB	0.044479
PA5218	PhoB	0.037319
PA0279	PhoB	0.023001
PA1347	PhoB	0.04782
PA1836	PhoB	0.051054
PA1283	PhoB	0.0488
PA0876	PhoB	0.041218
PA1136	PhoB	0.039709
PA0942	PhoB	0.048649
PA2551	PhoB	0.04919
PA3845	PhoB	0.047059
PA0217	PhoB	0.053338
PA2449	PhoB	0.055387
PA1157	PhoB	0.06244
PA0233	PhoB	0.056871
PA2032	PhoB	0.065237
PA3973	PhoB	0.151598
SphR	PhoB	0.187004
PA5283	PhoB	0.115528
PA4132	PhoB	0.129833
PA2196	PhoB	0.145073
PA3921	PhoB	0.135017
PA3174	PhoB	0.06654
PA2115	PhoB	0.069467
PA0243	PhoB	0.063503
PA5389	PhoB	0.057336
PA0831	PhoB	0.064267
PA1403	PhoB	0.073599
PA2601	PhoB	0.114071
PA0527	PhoB	0.084916
PA1853	PhoB	0.085179
PA2577	PhoB	0.136909
PA3714	PhoB	0.128786
PA3711	PhoB	0.126963
PA4147	PhoB	0.141202
PA1484	PhoB	0.132145
PA1850	PhoB	0.128196
PA0815	PhoB	0.095583
PA1504	PhoB	0.101262
PA3027	PhoB	0.089808
PA1109	PhoB	0.110298
PA4070	PhoB	0.098319
PA1380	PhoB	0.11108
PA3220	PhoB	0.105298
PA5157	PhoB	0.109442
PA5431	PhoB	0.100458
PA0701	PhoB	0.09052
PA1184	PhoB	0.085543
PA1261	PhoB	0.087817
PA1859	PhoB	0.095034
PA3508	PhoB	0.098231
PA2692	PhoB	0.075034
PA4381	PhoB	0.071768
PA3260	PhoB	0.082548
PA2766	PhoB	0.085638
PA5255	PhoB	0.083801
PA4784	PhoB	0.067221
PA3215	PhoB	0.062436
PA4145	PhoB	0.062893
PA0306	PhoB	0.076464
PA0816	PhoB	0.069247
PA2917	PhoB	0.07857
PA3094	PhoB	0.070607
PA3565	PhoB	0.074443
PA0475	PhoB	0.070771
PA0207	PhoB	0.081013
PA0403	PhoB	0.084959
PA2270	PhoB	0.076939
PA5428	PhoB	0.094802
PA2523	PhoB	0.104808
PA5116	PhoB	0.090958
PA4157	PhoB	0.084218
PA1759	PhoB	0.099349
PA2488	PhoB	0.098461
PA2047	PA3927	0.088317
PA2054	PA3927	0.112461
PA4196	PA3927	0.052831
PA4296	PA3927	0.065352
PA2056	PA3927	0.068957
PA2276	PA3927	0.05383
PA4916	PA3927	0.034246
PA1229	PA3927	0.03503
PA2096	PA3927	0.034932
PA4080	PA3927	0.057047
PA2957	PA3927	0.050087
PA0034	PA3927	0.025347
PA0877	PA3927	0.037396
PA2848	PA3927	0.053415
PA3604	PA3927	0.018286
PA3587	PA3927	0.016903
PA4914	PA3927	0.035593
PA2281	PA3927	0.075697
PA1653	PA3927	0.045405
PA3830	PA3927	0.057388
PA2417	PA3927	0.001579
PA2718	PA3927	0.002091
PA0601	PA3927	0.001497
PA0756	PA3927	0.000724
PA0797	PA3927	0.000808
PA0272	PA3927	0.000643
PA2010	PA3927	0.000828
PA5166	PA3927	0.001274
PA0218	PA3927	0.001325
PA1998	PA3927	0.001352
PA0448	PA3927	0.030352
PA1015	PA3927	0.016726
PA0611	PA3927	0.052237
PA0780	PA3927	0.031899
PA1312	PA3927	0.01889
PA2076	PA3927	0.013263
PA3269	PA3927	0.008952
PA4165	PA3927	0.021228
PA1309	PA3927	0.025979
PA1619	PA3927	0.032214
PA1138	PA3927	0.021851
PA2930	PA3927	0.024242
PA3948	PA3927	0.008232
PA2899	PA3927	0.004148
PA3045	PA3927	0.003513
RpoN	PA3927	0.008026
PA1182	PA3927	0.00452
PA3122	PA3927	0.006445
MvfR	PA3927	0.000681
GacA	PA3927	0.000812
PA3776	PA3927	0.004454
PA0533	PA3927	0.023771
PA2447	PA3927	0.018957
PA0056	PA3927	0.002141
PA3571	PA3927	0.002088
PA2834	PA3927	0.006562
PA5438	PA3927	0.031478
PA5029	PA3927	0.003351
PA1978	PA3927	0.010823
PA2123	PA3927	0.004132
RsaL	PA3927	0.005063
VqsM	PA3927	0.003082
PA3321	PA3927	0.010614
PA2696	PA3927	0.013153
PA5356	PA3927	0.007192
PA5525	PA3927	0.00046
PA5179	PA3927	0.005042
PA4074	PA3927	0.001262
ExsA	PA3927	0.000307
PA1961	PA3927	0.001663
PA0163	PA3927	0.007822
AlgR	PA3927	0.007394
VfR	PA3927	0.003044
PA4493	PA3927	0.085133
PA0155	PA3927	0.06923
PA3965	PA3927	0.072661
PA2556	PA3927	0.082364
PA3433	PA3927	0.080438
PA0367	PA3927	0.102379
PA3699	PA3927	0.110563
PA2299	PA3927	0.083788
PA3420	PA3927	0.088086
PA0873	PA3927	0.0682
PA4094	PA3927	0.086474
PA0167	PA3927	0.090752
PA2547	PA3927	0.127793
PA5032	PA3927	0.119407
PA5342	PA3927	0.089111
FleQ	PA3927	0.096624
PchR	PA3927	0.099411
PA4185	PA3927	0.109439
PA0707	PA3927	0.120526
PA4885	PA3927	0.100219
PA2704	PA3927	0.106196
PA4341	PA3927	0.145676
PA1285	PA3927	0.13009
PA2246	PA3927	0.081507
PA5382	PA3927	0.134061
PA0893	PA3927	0.086177
PA5218	PA3927	0.114642
PA0279	PA3927	0.072666
PA1347	PA3927	0.085853
PA1836	PA3927	0.076974
PA1283	PA3927	0.097811
PA0876	PA3927	0.091661
PA1136	PA3927	0.093356
PA0942	PA3927	0.099212
PA2551	PA3927	0.110332
PA3845	PA3927	0.107379
PA0217	PA3927	0.11128
PA2449	PA3927	0.110226
PA1157	PA3927	0.107074
PA0233	PA3927	0.11594
PA2032	PA3927	0.124198
PA3973	PA3927	0.156144
SphR	PA3927	0.133872
PA5283	PA3927	0.160218
PA4132	PA3927	0.13929
PA2196	PA3927	0.157819
PA3921	PA3927	0.163195
PA3174	PA3927	0.112181
PA2115	PA3927	0.113179
PA0243	PA3927	0.096734
PA5389	PA3927	0.100608
PA0831	PA3927	0.100202
PA1403	PA3927	0.123096
PA2601	PA3927	0.147536
PA0527	PA3927	0.129313
PA1853	PA3927	0.130063
PA2577	PA3927	0.153544
PA3714	PA3927	0.148649
PA3711	PA3927	0.15911
PA4147	PA3927	0.159201
PA1484	PA3927	0.154086
PA1850	PA3927	0.152699
PA0815	PA3927	0.139823
PA1504	PA3927	0.150642
PA3027	PA3927	0.140061
PA1109	PA3927	0.148983
PA4070	PA3927	0.142171
PA1380	PA3927	0.150527
PA3220	PA3927	0.153836
PA5157	PA3927	0.163814
PA5431	PA3927	0.155672
PA0701	PA3927	0.14644
PA1184	PA3927	0.136172
PA1261	PA3927	0.13665
PA1859	PA3927	0.147792
PA3508	PA3927	0.148312
PA2692	PA3927	0.134252
PA4381	PA3927	0.139897
PA3260	PA3927	0.141258
PA2766	PA3927	0.140413
PA5255	PA3927	0.137563
PA4784	PA3927	0.128017
PA3215	PA3927	0.123251
PA4145	PA3927	0.126498
PA0306	PA3927	0.132463
PA0816	PA3927	0.123399
PA2917	PA3927	0.136351
PA3094	PA3927	0.131162
PA3565	PA3927	0.133628
PA0475	PA3927	0.141007
PA0207	PA3927	0.13573
PA0403	PA3927	0.139658
PA2270	PA3927	0.124982
PA5428	PA3927	0.136118
PA2523	PA3927	0.138106
PA5116	PA3927	0.136815
PA4157	PA3927	0.159105
PA1759	PA3927	0.140647
PA2488	PA3927	0.158672
PA2054	PA2047	0.217299
PA4196	PA2047	0.058187
PA4296	PA2047	0.056152
PA2056	PA2047	0.076309
PA2276	PA2047	0.070026
PA4916	PA2047	0.097401
PA1229	PA2047	0.079281
PA2096	PA2047	0.095257
PA4080	PA2047	0.082985
PA2957	PA2047	0.086988
PA0034	PA2047	0.061884
PA0877	PA2047	0.058893
PA2848	PA2047	0.037615
PA3604	PA2047	0.035066
PA3587	PA2047	0.023504
PA4914	PA2047	0.031308
PA2281	PA2047	0.040807
PA1653	PA2047	0.073238
PA3830	PA2047	0.08793
PA2417	PA2047	0.000219
PA2718	PA2047	0.000143
PA0601	PA2047	0.000827
PA0756	PA2047	0.000151
PA0797	PA2047	0.000125
PA2010	PA2047	0.000202
PA5166	PA2047	0.000839
PA0218	PA2047	0.000706
PA1998	PA2047	0.000849
PA0448	PA2047	0.052347
PA1015	PA2047	0.063504
PA0611	PA2047	0.113269
PA0780	PA2047	0.098694
PA1312	PA2047	0.05726
PA2076	PA2047	0.048294
PA3269	PA2047	0.026112
PA4165	PA2047	0.072545
PA1309	PA2047	0.071294
PA1619	PA2047	0.081213
PA1138	PA2047	0.035328
PA2930	PA2047	0.027921
PA3948	PA2047	0.020239
PA2899	PA2047	0.027981
PA3045	PA2047	0.01565
RpoN	PA2047	0.003389
PA1182	PA2047	0.004864
PA3122	PA2047	0.003529
SoxR	PA2047	0.002181
PA3776	PA2047	0.005688
PA0533	PA2047	0.043508
PA2447	PA2047	0.023945
PA0056	PA2047	0.001767
PA3571	PA2047	0.012106
PA2834	PA2047	0.002456
PA5438	PA2047	0.014564
PA5029	PA2047	0.004571
PA1978	PA2047	0.01867
PA2123	PA2047	0.012494
RsaL	PA2047	0.00043
VqsM	PA2047	0.000137
PA3321	PA2047	0.008273
PA2696	PA2047	0.005423
PA5356	PA2047	0.009861
PA3599	PA2047	0.003028
PA3932	PA2047	0.00578
PA5525	PA2047	0.009451
PA4806	PA2047	0.003463
PA5179	PA2047	0.000235
PA4174	PA2047	0.000929
PA5374	PA2047	0.005776
ExsA	PA2047	0.005286
PA1961	PA2047	0.005453
PA0163	PA2047	0.01919
AlgR	PA2047	0.001859
VfR	PA2047	0.006123
PA4493	PA2047	0.077824
PA0155	PA2047	0.058453
PA3965	PA2047	0.061882
PA2556	PA2047	0.072609
PA3433	PA2047	0.066805
PA0367	PA2047	0.088219
PA3699	PA2047	0.087029
PA2299	PA2047	0.05979
PA3420	PA2047	0.071758
PA0873	PA2047	0.046538
PA4094	PA2047	0.047137
PA0167	PA2047	0.068444
PA2547	PA2047	0.115132
PA5032	PA2047	0.090154
PA5342	PA2047	0.098424
FleQ	PA2047	0.095053
PchR	PA2047	0.116044
PA4185	PA2047	0.151655
PA0707	PA2047	0.090577
PA4885	PA2047	0.081863
PA2704	PA2047	0.090992
PA4341	PA2047	0.080599
PA1285	PA2047	0.138528
PA2246	PA2047	0.105531
PA5382	PA2047	0.119837
PA0893	PA2047	0.086446
PA5218	PA2047	0.098015
PA0279	PA2047	0.124285
PA1347	PA2047	0.10254
PA1836	PA2047	0.075595
PA1283	PA2047	0.091861
PA0876	PA2047	0.083483
PA1136	PA2047	0.08147
PA0942	PA2047	0.092264
PA2551	PA2047	0.089359
PA3845	PA2047	0.089717
PA0217	PA2047	0.091288
PA2449	PA2047	0.096196
PA1157	PA2047	0.079108
PA0233	PA2047	0.117041
PA2032	PA2047	0.132122
PA3973	PA2047	0.104701
SphR	PA2047	0.108097
PA5283	PA2047	0.104317
PA4132	PA2047	0.145163
PA2196	PA2047	0.14237
PA3921	PA2047	0.14553
PA3174	PA2047	0.096729
PA2115	PA2047	0.093075
PA0243	PA2047	0.088174
PA5389	PA2047	0.085666
PA0831	PA2047	0.073848
PA1403	PA2047	0.098329
PA2601	PA2047	0.141515
PA0527	PA2047	0.101199
PA1853	PA2047	0.099881
PA2577	PA2047	0.126716
PA3714	PA2047	0.132514
PA3711	PA2047	0.134406
PA4147	PA2047	0.114665
PA1484	PA2047	0.107058
PA1850	PA2047	0.10779
PA0815	PA2047	0.139779
PA1504	PA2047	0.115361
PA3027	PA2047	0.09865
PA1109	PA2047	0.125139
PA4070	PA2047	0.119168
PA1380	PA2047	0.12235
PA3220	PA2047	0.129128
PA5157	PA2047	0.112672
PA5431	PA2047	0.101416
PA0701	PA2047	0.113097
PA1184	PA2047	0.126072
PA1261	PA2047	0.122741
PA1859	PA2047	0.114978
PA3508	PA2047	0.133463
PA2692	PA2047	0.112711
PA4381	PA2047	0.09688
PA3260	PA2047	0.11155
PA2766	PA2047	0.117218
PA5255	PA2047	0.116891
PA4784	PA2047	0.111004
PA3215	PA2047	0.093295
PA4145	PA2047	0.09817
PA0306	PA2047	0.125081
PA0816	PA2047	0.115581
PA2917	PA2047	0.104491
PA3094	PA2047	0.111319
PA3565	PA2047	0.123711
PA0475	PA2047	0.166839
PA0207	PA2047	0.12403
PA0403	PA2047	0.129496
PA2270	PA2047	0.107212
PA5428	PA2047	0.108022
PA2523	PA2047	0.125022
PA5116	PA2047	0.116022
PA4157	PA2047	0.096073
PA1759	PA2047	0.101363
PA2488	PA2047	0.110957
PA4196	PA2054	0.049896
PA4296	PA2054	0.049362
PA2056	PA2054	0.041762
PA2276	PA2054	0.028825
PA4916	PA2054	0.065708
PA1229	PA2054	0.047894
PA2096	PA2054	0.057331
PA4080	PA2054	0.078353
PA2957	PA2054	0.036009
PA0034	PA2054	0.033808
PA0877	PA2054	0.042131
PA2848	PA2054	0.037414
PA3604	PA2054	0.013117
PA3587	PA2054	0.011178
PA4914	PA2054	0.022967
PA2281	PA2054	0.037486
PA1653	PA2054	0.047514
PA3830	PA2054	0.067173
PA2417	PA2054	0.000332
PA2718	PA2054	0.00035
PA0601	PA2054	0.000899
PA0756	PA2054	0.000444
PA0797	PA2054	0.00019
PA0272	PA2054	0.000474
PA2010	PA2054	0.000699
PA5166	PA2054	0.00079
PA0218	PA2054	0.001516
PA1998	PA2054	0.001072
PA0448	PA2054	0.054006
PA1015	PA2054	0.066896
PA0611	PA2054	0.137258
PA0780	PA2054	0.108289
PA1312	PA2054	0.082401
PA2076	PA2054	0.065873
PA3269	PA2054	0.030461
PA4165	PA2054	0.07028
PA1309	PA2054	0.081307
PA1619	PA2054	0.090543
PA1138	PA2054	0.035999
PA2930	PA2054	0.024511
PA3948	PA2054	0.015742
PA2899	PA2054	0.014892
PA3045	PA2054	0.014393
RpoN	PA2054	0.001077
PA1182	PA2054	0.006256
PA3122	PA2054	0.001974
SoxR	PA2054	0.002548
PA3776	PA2054	0.005862
PA0533	PA2054	0.041426
PA2447	PA2054	0.022694
PA0056	PA2054	0.001104
PA3571	PA2054	0.019173
PA2834	PA2054	0.002806
PA5438	PA2054	0.022886
PA5029	PA2054	0.007506
PA1978	PA2054	0.001653
PA3321	PA2054	0.008186
PA2696	PA2054	0.00259
PA5356	PA2054	0.008469
PA3599	PA2054	0.007679
PA3932	PA2054	0.008087
PA5525	PA2054	0.012589
PA5179	PA2054	0.002332
PA4174	PA2054	0.000529
ExsA	PA2054	0.012408
PA1961	PA2054	0.008968
PA0163	PA2054	0.013569
AlgR	PA2054	0.002822
VfR	PA2054	0.00203
PA4493	PA2054	0.058699
PA0155	PA2054	0.052114
PA3965	PA2054	0.057248
PA2556	PA2054	0.059405
PA3433	PA2054	0.055744
PA0367	PA2054	0.080571
PA3699	PA2054	0.076829
PA2299	PA2054	0.063494
PA3420	PA2054	0.065119
PA0873	PA2054	0.055718
PA4094	PA2054	0.056953
PA0167	PA2054	0.082957
PA2547	PA2054	0.139772
PA5032	PA2054	0.101384
PA5342	PA2054	0.097989
FleQ	PA2054	0.136792
PchR	PA2054	0.121492
PA4185	PA2054	0.182823
PA0707	PA2054	0.134014
PA4885	PA2054	0.110292
PA2704	PA2054	0.101239
PA4341	PA2054	0.09503
PA1285	PA2054	0.191654
PA2246	PA2054	0.121296
PA5382	PA2054	0.171051
PA0893	PA2054	0.079023
PA5218	PA2054	0.124485
PA0279	PA2054	0.084575
PA1347	PA2054	0.086348
PA1836	PA2054	0.065686
PA1283	PA2054	0.082684
PA0876	PA2054	0.065973
PA1136	PA2054	0.06431
PA0942	PA2054	0.076266
PA2551	PA2054	0.075337
PA3845	PA2054	0.075499
PA0217	PA2054	0.081233
PA2449	PA2054	0.083738
PA1157	PA2054	0.080845
PA0233	PA2054	0.094296
PA2032	PA2054	0.110126
PA3973	PA2054	0.14133
SphR	PA2054	0.133513
PA5283	PA2054	0.125651
PA4132	PA2054	0.173128
PA2196	PA2054	0.183673
PA3921	PA2054	0.195253
PA3174	PA2054	0.087666
PA2115	PA2054	0.075547
PA0243	PA2054	0.07537
PA5389	PA2054	0.072532
PA0831	PA2054	0.079684
PA1403	PA2054	0.108345
PA2601	PA2054	0.163227
PA0527	PA2054	0.108644
PA1853	PA2054	0.109578
PA2577	PA2054	0.164381
PA3714	PA2054	0.159229
PA3711	PA2054	0.165264
PA4147	PA2054	0.147887
PA1484	PA2054	0.137852
PA1850	PA2054	0.133753
PA0815	PA2054	0.138647
PA1504	PA2054	0.128186
PA3027	PA2054	0.107705
PA1109	PA2054	0.144048
PA4070	PA2054	0.134444
PA1380	PA2054	0.140056
PA3220	PA2054	0.147635
PA5157	PA2054	0.138523
PA5431	PA2054	0.135347
PA0701	PA2054	0.123814
PA1184	PA2054	0.128535
PA1261	PA2054	0.12675
PA1859	PA2054	0.127348
PA3508	PA2054	0.145619
PA2692	PA2054	0.112755
PA4381	PA2054	0.104302
PA3260	PA2054	0.116252
PA2766	PA2054	0.122518
PA5255	PA2054	0.122744
PA4784	PA2054	0.105024
PA3215	PA2054	0.094619
PA4145	PA2054	0.092592
PA0306	PA2054	0.120723
PA0816	PA2054	0.107592
PA2917	PA2054	0.106872
PA3094	PA2054	0.104056
PA3565	PA2054	0.107148
PA0475	PA2054	0.149764
PA0207	PA2054	0.132435
PA0403	PA2054	0.135805
PA2270	PA2054	0.097572
PA5428	PA2054	0.112497
PA2523	PA2054	0.127188
PA5116	PA2054	0.123685
PA4157	PA2054	0.106749
PA1759	PA2054	0.112916
PA2488	PA2054	0.125245
PA4296	PA4196	0.083187
PA2056	PA4196	0.077418
PA2276	PA4196	0.068267
PA4916	PA4196	0.059196
PA1229	PA4196	0.059741
PA2096	PA4196	0.070807
PA4080	PA4196	0.055124
PA2957	PA4196	0.069559
PA0034	PA4196	0.052107
PA0877	PA4196	0.059478
PA2848	PA4196	0.035782
PA3604	PA4196	0.036426
PA3587	PA4196	0.015105
PA4914	PA4196	0.027104
PA2281	PA4196	0.061714
PA1653	PA4196	0.025905
PA3830	PA4196	0.037159
PA2417	PA4196	0.000234
PA2718	PA4196	0.000137
PA0601	PA4196	0.000512
PA0756	PA4196	0.000252
PA0797	PA4196	0.00047
PA0272	PA4196	8.32e-05
PA2010	PA4196	6.53e-05
PA5166	PA4196	6.35e-05
PA0218	PA4196	0.001669
PA1998	PA4196	0.000402
PA0448	PA4196	0.017352
PA1015	PA4196	0.012126
PA0611	PA4196	0.026888
PA0780	PA4196	0.030242
PA1312	PA4196	0.023348
PA2076	PA4196	0.016171
PA3269	PA4196	0.002252
PA4165	PA4196	0.029645
PA1309	PA4196	0.032997
PA1619	PA4196	0.05126
PA1138	PA4196	0.123276
PA2930	PA4196	0.135917
PA3948	PA4196	0.016715
PA2899	PA4196	0.019883
PA3045	PA4196	0.018677
RpoN	PA4196	0.005466
PA1182	PA4196	0.001741
PA3122	PA4196	0.001222
GacA	PA4196	0.000113
PA3776	PA4196	0.001777
PA0533	PA4196	0.010085
PA2447	PA4196	0.003272
PA0056	PA4196	0.000223
PA3571	PA4196	0.003504
PA2834	PA4196	0.001009
PA5438	PA4196	0.011684
PA5029	PA4196	0.012665
PA1978	PA4196	0.029274
PA2123	PA4196	0.007789
RsaL	PA4196	0.002166
VqsM	PA4196	0.00203
PA3321	PA4196	0.020606
PA5356	PA4196	0.022354
PA3599	PA4196	0.002762
PA3932	PA4196	0.000254
PA5374	PA4196	0.007266
MexT	PA4196	0.003795
ExsA	PA4196	0.004599
PA1961	PA4196	0.005943
PA0163	PA4196	0.007307
AlgR	PA4196	0.002557
VfR	PA4196	0.003826
PA4493	PA4196	0.079547
PA0155	PA4196	0.068539
PA3965	PA4196	0.072442
PA2556	PA4196	0.073315
PA3433	PA4196	0.069738
PA0367	PA4196	0.088386
PA3699	PA4196	0.099302
PA2299	PA4196	0.067482
PA3420	PA4196	0.068531
PA0873	PA4196	0.051017
PA4094	PA4196	0.060344
PA0167	PA4196	0.076953
PA2547	PA4196	0.069024
PA5032	PA4196	0.096919
PA5342	PA4196	0.119778
FleQ	PA4196	0.136614
PchR	PA4196	0.139311
PA4185	PA4196	0.117967
PA0707	PA4196	0.078304
PA4885	PA4196	0.094792
PA2704	PA4196	0.090102
PA4341	PA4196	0.114162
PA1285	PA4196	0.069772
PA2246	PA4196	0.0371
PA5382	PA4196	0.088566
PA0893	PA4196	0.064061
PA5218	PA4196	0.064573
PA0279	PA4196	0.110947
PA1347	PA4196	0.165425
PA1836	PA4196	0.21118
PA1283	PA4196	0.066656
PA0876	PA4196	0.090507
PA1136	PA4196	0.083855
PA0942	PA4196	0.092274
PA2551	PA4196	0.09726
PA3845	PA4196	0.094611
PA0217	PA4196	0.103357
PA2449	PA4196	0.101087
PA1157	PA4196	0.098697
PA0233	PA4196	0.102948
PA2032	PA4196	0.102109
PA3973	PA4196	0.13711
SphR	PA4196	0.168137
PA5283	PA4196	0.131553
PA4132	PA4196	0.136106
PA2196	PA4196	0.139874
PA3921	PA4196	0.110037
PA3174	PA4196	0.150357
PA2115	PA4196	0.148649
PA0243	PA4196	0.145472
PA5389	PA4196	0.143354
PA0831	PA4196	0.082919
PA1403	PA4196	0.076436
PA2601	PA4196	0.097857
PA0527	PA4196	0.107118
PA1853	PA4196	0.11016
PA2577	PA4196	0.138953
PA3714	PA4196	0.147287
PA3711	PA4196	0.151053
PA4147	PA4196	0.141622
PA1484	PA4196	0.150506
PA1850	PA4196	0.148076
PA0815	PA4196	0.1249
PA1504	PA4196	0.142983
PA3027	PA4196	0.134197
PA1109	PA4196	0.135577
PA4070	PA4196	0.123069
PA1380	PA4196	0.147924
PA3220	PA4196	0.133525
PA5157	PA4196	0.14589
PA5431	PA4196	0.128492
PA0701	PA4196	0.129285
PA1184	PA4196	0.122337
PA1261	PA4196	0.120411
PA1859	PA4196	0.138516
PA3508	PA4196	0.1349
PA2692	PA4196	0.124384
PA4381	PA4196	0.114568
PA3260	PA4196	0.13637
PA2766	PA4196	0.126636
PA5255	PA4196	0.120135
PA4784	PA4196	0.105731
PA3215	PA4196	0.108877
PA4145	PA4196	0.113549
PA0306	PA4196	0.129069
PA0816	PA4196	0.119144
PA2917	PA4196	0.127389
PA3094	PA4196	0.124489
PA3565	PA4196	0.12738
PA0475	PA4196	0.08175
PA0207	PA4196	0.103855
PA0403	PA4196	0.086795
PA2270	PA4196	0.143815
PA5428	PA4196	0.190461
PA2523	PA4196	0.133136
PA5116	PA4196	0.131682
PA4157	PA4196	0.124246
PA1759	PA4196	0.125768
PA2488	PA4196	0.122154
PA2056	PA4296	0.030932
PA2276	PA4296	0.016864
PA4916	PA4296	0.021499
PA1229	PA4296	0.014142
PA2096	PA4296	0.018048
PA4080	PA4296	0.038707
PA2957	PA4296	0.023148
PA0034	PA4296	0.023862
PA0877	PA4296	0.025542
PA2848	PA4296	0.031883
PA3604	PA4296	0.008262
PA3587	PA4296	0.004108
PA4914	PA4296	0.014776
PA2281	PA4296	0.065853
PA1653	PA4296	0.022034
PA3830	PA4296	0.017471
PA2417	PA4296	0.000527
PA2718	PA4296	0.000667
PA0601	PA4296	0.000488
PA0756	PA4296	0.000281
PA0797	PA4296	0.00051
PA0272	PA4296	0.000105
PA2010	PA4296	0.000286
PA5166	PA4296	0.000551
PA0218	PA4296	0.00164
PA1998	PA4296	0.000606
PA0448	PA4296	0.01656
PA1015	PA4296	0.016606
PA0611	PA4296	0.018554
PA0780	PA4296	0.021426
PA1312	PA4296	0.005588
PA2076	PA4296	0.007701
PA3269	PA4296	0.007125
PA4165	PA4296	0.018159
PA1309	PA4296	0.038472
PA1619	PA4296	0.04525
PA1138	PA4296	0.055553
PA2930	PA4296	0.035216
PA3948	PA4296	0.000211
PA3045	PA4296	0.003402
RpoN	PA4296	0.004564
PA1182	PA4296	0.000922
PA3122	PA4296	0.002505
MvfR	PA4296	0.003411
SoxR	PA4296	0.002017
PA3776	PA4296	0.002244
PA0533	PA4296	0.012982
PA2447	PA4296	0.007807
PA0056	PA4296	0.002391
PA3571	PA4296	0.006182
PA2834	PA4296	0.002415
PA5438	PA4296	0.008978
PA5029	PA4296	0.002863
PA1978	PA4296	0.003427
PA2123	PA4296	0.00102
RsaL	PA4296	0.006803
VqsM	PA4296	0.005703
PA3321	PA4296	0.016167
PA2696	PA4296	0.002247
PA5356	PA4296	0.018778
PA3599	PA4296	0.00423
PA3932	PA4296	0.000423
PA5525	PA4296	0.003053
PA5179	PA4296	0.000286
PA0163	PA4296	0.004938
AlgR	PA4296	0.002688
PA4493	PA4296	0.041151
PA0155	PA4296	0.043067
PA3965	PA4296	0.051334
PA2556	PA4296	0.051464
PA3433	PA4296	0.048787
PA0367	PA4296	0.074187
PA3699	PA4296	0.078617
PA2299	PA4296	0.05811
PA3420	PA4296	0.054953
PA0873	PA4296	0.049553
PA4094	PA4296	0.069021
PA0167	PA4296	0.077408
PA2547	PA4296	0.094867
PA5032	PA4296	0.132389
PA5342	PA4296	0.127605
FleQ	PA4296	0.137087
PchR	PA4296	0.113912
PA4185	PA4296	0.130799
PA0707	PA4296	0.111421
PA4885	PA4296	0.110184
PA2704	PA4296	0.069641
PA4341	PA4296	0.131793
PA1285	PA4296	0.052655
PA2246	PA4296	0.028221
PA5382	PA4296	0.052504
PA0893	PA4296	0.05437
PA5218	PA4296	0.04396
PA0279	PA4296	0.046303
PA1347	PA4296	0.071839
PA1836	PA4296	0.091639
PA1283	PA4296	0.060073
PA0876	PA4296	0.060215
PA1136	PA4296	0.059552
PA0942	PA4296	0.068925
PA2551	PA4296	0.066601
PA3845	PA4296	0.070204
PA0217	PA4296	0.079023
PA2449	PA4296	0.075742
PA1157	PA4296	0.080308
PA0233	PA4296	0.075211
PA2032	PA4296	0.070425
PA3973	PA4296	0.15972
SphR	PA4296	0.138319
PA5283	PA4296	0.144211
PA4132	PA4296	0.123862
PA2196	PA4296	0.124484
PA3921	PA4296	0.113839
PA3174	PA4296	0.091019
PA2115	PA4296	0.099194
PA0243	PA4296	0.091222
PA5389	PA4296	0.089487
PA0831	PA4296	0.078732
PA1403	PA4296	0.071095
PA2601	PA4296	0.100877
PA0527	PA4296	0.099741
PA1853	PA4296	0.097794
PA2577	PA4296	0.120101
PA3714	PA4296	0.132834
PA3711	PA4296	0.128666
PA4147	PA4296	0.140861
PA1484	PA4296	0.129097
PA1850	PA4296	0.140022
PA0815	PA4296	0.104194
PA1504	PA4296	0.118431
PA3027	PA4296	0.112385
PA1109	PA4296	0.122949
PA4070	PA4296	0.110805
PA1380	PA4296	0.124619
PA3220	PA4296	0.112957
PA5157	PA4296	0.146471
PA5431	PA4296	0.123038
PA0701	PA4296	0.114921
PA1184	PA4296	0.113137
PA1261	PA4296	0.106832
PA1859	PA4296	0.122959
PA3508	PA4296	0.114844
PA2692	PA4296	0.099368
PA4381	PA4296	0.100858
PA3260	PA4296	0.111205
PA2766	PA4296	0.111724
PA5255	PA4296	0.106232
PA4784	PA4296	0.084829
PA3215	PA4296	0.090553
PA4145	PA4296	0.090954
PA0306	PA4296	0.096311
PA0816	PA4296	0.091273
PA2917	PA4296	0.093474
PA3094	PA4296	0.091106
PA3565	PA4296	0.094651
PA0475	PA4296	0.071494
PA0207	PA4296	0.089889
PA0403	PA4296	0.091323
PA2270	PA4296	0.103619
PA5428	PA4296	0.121309
PA2523	PA4296	0.104449
PA5116	PA4296	0.107056
PA4157	PA4296	0.112897
PA1759	PA4296	0.116876
PA2488	PA4296	0.120437
PA2276	PA2056	0.331223
PA4916	PA2056	0.12559
PA1229	PA2056	0.13331
PA2096	PA2056	0.144632
PA4080	PA2056	0.124201
PA2957	PA2056	0.23289
PA0034	PA2056	0.153893
PA0877	PA2056	0.148696
PA2848	PA2056	0.073587
PA3604	PA2056	0.075205
PA3587	PA2056	0.083689
PA4914	PA2056	0.10127
PA2281	PA2056	0.055874
PA1653	PA2056	0.102722
PA3830	PA2056	0.077036
PA2417	PA2056	0.000105
PA2718	PA2056	2.6e-05
PA0601	PA2056	0.000252
PA0756	PA2056	0.00012
PA0797	PA2056	0.000277
PA0272	PA2056	0.000139
PA2010	PA2056	8.37e-05
PA5166	PA2056	0.000106
PA0218	PA2056	0.000315
PA1998	PA2056	0.000254
PA0448	PA2056	0.019522
PA1015	PA2056	0.021305
PA0611	PA2056	0.034555
PA0780	PA2056	0.018896
PA1312	PA2056	0.014785
PA2076	PA2056	0.007375
PA3269	PA2056	0.012524
PA4165	PA2056	0.037506
PA1309	PA2056	0.011943
PA1619	PA2056	0.052541
PA1138	PA2056	0.016802
PA2930	PA2056	0.05018
PA3948	PA2056	0.001823
PA3045	PA2056	0.001892
RpoN	PA2056	0.01357
PA1182	PA2056	0.000281
PA3122	PA2056	0.004411
MvfR	PA2056	0.00202
GacA	PA2056	0.000469
PA0533	PA2056	0.013353
PA2447	PA2056	0.010299
PA0056	PA2056	0.000413
PA3571	PA2056	0.001848
PA2834	PA2056	1.43e-05
PA5438	PA2056	0.009064
PA5029	PA2056	0.010793
PA1978	PA2056	0.054625
PA2123	PA2056	0.010991
RsaL	PA2056	0.000682
VqsM	PA2056	0.000525
PA3321	PA2056	0.003745
PA2696	PA2056	0.003414
PA5356	PA2056	0.007022
PA3599	PA2056	0.001101
PA3932	PA2056	0.001724
PA4806	PA2056	0.001084
PA5179	PA2056	7.73e-05
PA4074	PA2056	0.001835
PA4174	PA2056	0.002453
PA5374	PA2056	0.002079
PA2686	PA2056	0.000948
ExsA	PA2056	0.001881
PA1961	PA2056	0.002173
PA0163	PA2056	0.002182
AlgR	PA2056	0.008868
VfR	PA2056	0.003424
PA4493	PA2056	0.290902
PA0155	PA2056	0.162998
PA3965	PA2056	0.156323
PA2556	PA2056	0.183016
PA3433	PA2056	0.17391
PA0367	PA2056	0.14524
PA3699	PA2056	0.163615
PA2299	PA2056	0.109486
PA3420	PA2056	0.108242
PA0873	PA2056	0.032763
PA4094	PA2056	0.013465
PA0167	PA2056	0.02769
PA2547	PA2056	0.038221
PA5032	PA2056	0.035537
PA5342	PA2056	0.067162
FleQ	PA2056	0.026339
PchR	PA2056	0.03465
PA4185	PA2056	0.057746
PA0707	PA2056	0.057474
PA4885	PA2056	0.052505
PA2704	PA2056	0.09643
PA4341	PA2056	0.071356
PA1285	PA2056	0.072102
PA2246	PA2056	0.046919
PA5382	PA2056	0.048646
PA0893	PA2056	0.083023
PA5218	PA2056	0.101321
PA0279	PA2056	0.213945
PA1347	PA2056	0.132146
PA1836	PA2056	0.167391
PA1283	PA2056	0.104841
PA0876	PA2056	0.176548
PA1136	PA2056	0.174796
PA0942	PA2056	0.167728
PA2551	PA2056	0.203151
PA3845	PA2056	0.197713
PA0217	PA2056	0.181394
PA2449	PA2056	0.179969
PA1157	PA2056	0.134379
PA0233	PA2056	0.208557
PA2032	PA2056	0.220086
PA3973	PA2056	0.0389
SphR	PA2056	0.065481
PA5283	PA2056	0.076375
PA4132	PA2056	0.08512
PA2196	PA2056	0.071546
PA3921	PA2056	0.060366
PA3174	PA2056	0.141467
PA2115	PA2056	0.185059
PA0243	PA2056	0.15596
PA5389	PA2056	0.147329
PA0831	PA2056	0.072483
PA1403	PA2056	0.101736
PA2601	PA2056	0.086191
PA0527	PA2056	0.113107
PA1853	PA2056	0.117276
PA2577	PA2056	0.08298
PA3714	PA2056	0.091896
PA3711	PA2056	0.0981
PA4147	PA2056	0.071243
PA1484	PA2056	0.086135
PA1850	PA2056	0.081742
PA0815	PA2056	0.134912
PA1504	PA2056	0.129759
PA3027	PA2056	0.144273
PA1109	PA2056	0.111472
PA4070	PA2056	0.092463
PA1380	PA2056	0.096538
PA3220	PA2056	0.103113
PA5157	PA2056	0.102004
PA5431	PA2056	0.093273
PA0701	PA2056	0.127963
PA1184	PA2056	0.129653
PA1261	PA2056	0.118335
PA1859	PA2056	0.122643
[truncated: 14,177 more rows]
